# Supplementary material for: Bio-renewable enantioselective aldol reaction in natural deep eutectic solvents
Source: Royal Society of Chemistry journal article supplement (doi:10.1039/c5gc02526e), 2015-11-05
Supplement: c5gc02526e1.pdf [file c5gc02526e1.pdf]

Supporting Information for

**Bio-renewable Enantioselective Aldol Reaction in Natural Deep Eutectic Solvents.**

*Regina Martínez, Lucía Berbegal, Gabriela Guillena,\* and Diego J. Ramón\**

*Departamento de Química Orgánica e Instituto de Síntesis Orgánica, Universidad de Alicante, Apdo.  
99, Carretera de San Vicente s/n, E-03080-Alicante, Spain*

[Gabriela.guillena@ua.es](mailto:Gabriela.guillena@ua.es), [djramon@ua.es](mailto:djramon@ua.es)

**Table of Contents**

|                                          |     |
|------------------------------------------|-----|
| General information and procedures ..... | S2  |
| Spectra data for aldol products.....     | S3  |
| NMR spectra for aldol products.....      | S10 |
| HPLC for aldol products.....             | S31 |
| References.....                          | S73 |

**General Information:** All reactions were carried out under argon. All reagents are commercially available and used without further purification. <sup>1</sup>H NMR (300 MHz, 400 MHz) and <sup>13</sup>C NMR (75 MHz) spectra were obtained at 25 °C using CDCl<sub>3</sub> as solvent and chemical shifts are reported as δ values relative to TMS as internal standard. HPLC analyses were performed on equipped with a chiral column and automatic injector, using mixtures of n-hexane/isopropyl alcohol (IPA) as mobile phase, at 25 °C. Analytical TLC was performed on silica gel plates and the spots were visualized under UV light (λ=254 nm). For flash chromatography we employed silica gel 60 (0.040-0.063 mm). For recycling experiments, an Edwards T-station equipped with a diaphragm pump 75 was used for water evaporation.

**General procedure for the preparation of DES:** The corresponding solid components of the desired DES in the correct proportion were placed in a 50 mL round-bottom flask. The resulting mixture was heated to 80 °C (from 1 to 3 h) under argon atmosphere with stirring until a clear colourless liquid was obtained.

**General procedure for the aldol reaction in deep eutectic solvent:** To around 1 mL of the corresponding solvent in a vessel under argon atmosphere, L-proline (0.035 g, 30 mol%) and the corresponding aldehyde (1 mmol) were added. Then the source of nucleophile was charged (5 mmol for the case of acetone and propanal, 1 mmol for cyclohexanone, 2 for the other ketones). The reaction mixture was stirred under argon atmosphere for 24 h to 5 days (see Table 1 and 2, Scheme 3 and text) at room temperature. Then, 2 mL of water were added and the mixture was extracted with ethyl acetate (3 × 1 mL). The resulting organic phase was dried over anhydrous magnesium sulphate, and the solvent was evaporated under reduced pressure. The resulting crude material was purified by percolation through a small pad of silica gel with 1:1 ethyl acetate/hexane mixtures. In the case of using propanal, after extraction, the resulting organic phase was dried over anhydrous magnesium sulphate, and the solvent was evaporated under reduced pressure. The resulting crude was treated with sodium borohydride (5 mmol, 190 mg) in methanol (3 mL). The reaction mixture was stirred during 2 h at 0 °C. After reaction, phosphate buffer (2 mL) was added, and the mixture was extracted with ethyl acetate (3 × 1 mL). The resulting organic phase was dried over anhydrous magnesium sulphate, and the solvent was evaporated under reduced pressure. The resulting crude material was purified by percolation through a small pad of silica gel with 1:1 ethyl acetate/hexane mixtures.

**Recover and reuse of the catalyst and DES:** To the corresponding solvent [aprox 3 mL: D-glucose (2.7 g) and D/L-malic acid (2.1 g)] were placed in a vessel under argon atmosphere. L-proline (0.175 g) and the corresponding aldehyde (5 mmol) were added. Then the source of nucleophile was charged (25 mmol). The reaction mixture was stirred under argon atmosphere for 24 h. Then, 10 mL of water was

added and the resulting organic upper layer was collected through a pipette for the gram scale procedure. The resulting organic phase was dried over anhydrous magnesium sulphate, and the solvent was evaporated under reduced pressure. The resulting crude material was purified recrystallization from ethyl acetate/hexane mixtures. The aqueous layer was evaporated under reduced pressure. Water traces were eliminated for the residue using a high-vacuum membrane pump system over 24 hours. Then, the flask containing the DES and L-proline was charged with a new batch of aldehyde and acetone.

### Spectra data of aldol products

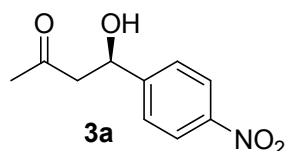

#### 4-Hydroxy-4-(4-nitrophenyl)butan-2-one:[1]

$^1\text{H}$  NMR (300 MHz,  $\text{CDCl}_3$ , 25 °C, TMS):  $\delta$ =2.22 (s, 3H), 2.86 (d,  $J(\text{H,H})$ =2.9 Hz, 2H), 3.59 (d,  $J(\text{H,H})$ = 3.3 Hz, 1H), 5.27 (dd,  $J(\text{H,H})$ = 2.9, 3.3 Hz, 1H), 7.55 (d,  $J(\text{H,H})$ = 8.8 Hz, 2H), 8.21 ppm (d,  $J(\text{H,H})$ = 8.8 Hz, 2H).  $^{13}\text{C}$  NMR (75 MHz,  $\text{CDCl}_3$ , 25 °C, TMS):  $\delta$ =30.5, 51.4, 68.7, 123.6, 126.3, 147.3, 149.8, 208.2 ppm.

The enantiomeric excess was determined by HPLC with a Chiralcel AS column at 254 nm (*n*-hexane/*i*-PrOH: 85/15, 1.0 mL/min),  $t_{\text{R}}$  = 16.8 (major),  $t_{\text{R}}$  = 26.8 (minor).

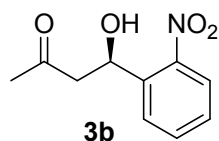

#### 4-Hydroxy-4-(2-nitrophenyl)butan-2-one:[2]

$^1\text{H}$  NMR (400 MHz,  $\text{CDCl}_3$ , 25 °C, TMS):  $\delta$ =2.17 (s, 3H), 2.92-2.73 (m, 2H), 3.60 (br s, 1H), 3.82 (s, 3H), 5.41 (d, 1H,  $J(\text{H,H})$ =8 Hz), 6.86 (d, 1H,  $J(\text{H,H})$ =8 Hz), 6.97 (t, 1H,  $J(\text{H,H})$ =8 Hz), 7.25 (t, 1H,  $J(\text{H,H})$ =8 Hz), 7.44 ppm (d, 1H,  $J(\text{H,H})$ = 8 Hz).  $^{13}\text{C}$  NMR (100 MHz,  $\text{CDCl}_3$ , 25 °C, TMS):  $\delta$ = 30.5, 50.3, 55.2, 65.3, 110.2, 120.7, 126.2, 128.3, 130.9, 155.7 ppm.

The enantiomeric excess was determined by HPLC with a Chiralcel ADH column at 254 nm (*n*-hexane/*i*-PrOH: 98/2, 1.0 mL/min),  $t_{\text{R}}$  = 41.7 (major),  $t_{\text{R}}$  = 45 (minor).

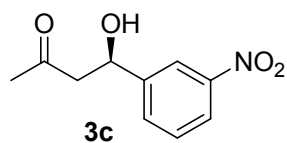

#### 4-Hydroxy-4-(3-nitrophenyl)butan-2-one:[2]

$^1\text{H}$  NMR (300 MHz,  $\text{CDCl}_3$ , 25 °C, TMS):  $\delta$ =2.21 (s, 3H), 2.69-2.96 (m, 2H), 3.39 (s, 1H), 5.12 (dd, 1H,  $J(\text{H,H})$ =7.8, 4.5 Hz), 7.24 (d, 2H,  $J(\text{H,H})$ = 8.3 Hz), 7.48 ppm (d, 2H,  $J(\text{H,H})$ =8.4 Hz).  $^{13}\text{C}$  NMR (75 MHz,  $\text{CDCl}_3$ , 25 °C, TMS): 30.7, 51.5, 68.8, 120.7, 122.6, 129.5, 131.8, 144.7, 148.3, 208.8 ppm.

The enantiomeric excess was determined by HPLC with a Chiralcel ADH column at 254 nm (*n*-hexane/*i*-PrOH: 95/5, 1.0 mL/min),  $t_{\text{R}}$  = 21.4 (major),  $t_{\text{R}}$  = 22.7 (minor).

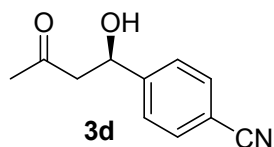

#### 4-(4-Cyanophenyl)-4-hydroxybutan-2-one:[2]

$^1\text{H}$  NMR (300 MHz,  $\text{CDCl}_3$ , 25 °C, TMS):  $\delta$ =2.21 (s, 3H), 2.83 (m, 2H), 5.05-5.24 (m, 1H), 7.47 (d, 2H,  $J(\text{H,H})$ = 8.7 Hz), 7.63 ppm (d, 2H,  $J(\text{H,H})$ =8.7 Hz).  $^{13}\text{C}$  NMR (75 MHz,  $\text{CDCl}_3$ , 25 °C, TMS): 29.4, 51.6, 68.9, 111.2, 118.8, 126.4, 132.4, 148.1, 208.7 ppm.

The enantiomeric excess was determined by HPLC with a Chiralcel ODH column at 230 nm (*n*-hexane/*i*-PrOH: 95/5, 1.0 mL/min),  $t_{\text{R}}$  = 31.2 (major),  $t_{\text{R}}$  = 36.3 (minor).

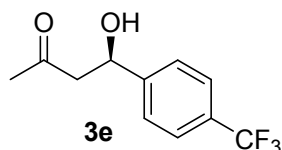

#### 4-Hydroxy-4-(4-(trifluoromethyl)phenyl)butan-2-one:[2]

$^1\text{H}$  NMR (300 MHz,  $\text{CDCl}_3$ , 25 °C, TMS):  $\delta$ =2.22 (s, 3H), 2.86 (d,  $J(\text{H,H})$ =2.9 Hz, 2H), 3.59 (d,  $J(\text{H,H})$ = 3.3 Hz, 1H), 5.27 (dd,  $J(\text{H,H})$ = 2.9, 3.3 Hz, 1H), 7.55 (d,  $J(\text{H,H})$ = 8.8 Hz, 2H), 8.21 ppm (d,  $J(\text{H,H})$ = 8.8 Hz, 2H).  $^{13}\text{C}$  NMR (75 MHz,  $\text{CDCl}_3$ , 25 °C, TMS):  $\delta$ =30.5, 51.4, 68.7, 123.6, 126.3, 147.3, 149.8, 208.2 ppm.

The enantiomeric excess was determined by HPLC with a Chiralcel AS column at 230 nm (*n*-hexane/*i*-PrOH: 92/8, 1.0 mL/min),  $t_{\text{R}}$  = 8.6 (major),  $t_{\text{R}}$  = 10.8 (minor).

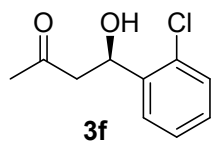

#### 4-(2-Chlorophenyl)-4-hydroxybutan-2-one:[1]

$^1\text{H}$  NMR (300 MHz,  $\text{CDCl}_3$ , 25 °C, TMS):  $\delta$ =2.17 (s, 3H), 2.61-2.96 (m, 2H), 3.80 (br s, 1H), 5.46-5.55 (m, 1H), 7.14-7.28 ppm (m, 4H).  $^{13}\text{C}$  NMR (75 MHz,  $\text{CDCl}_3$ , 25 °C, TMS): 30.5, 50.1, 66.5, 127.1, 127.2, 128.5, 129.5, 129.3, 209.0 ppm.

The enantiomeric excess was determined by HPLC with a Chiralcel AS column at 254 nm (*n*-hexane/*i*-PrOH: 98/2, 1.0 mL/min),  $t_{\text{R}} = 20.8$  (minor),  $t_{\text{R}} = 24.4$  (major).

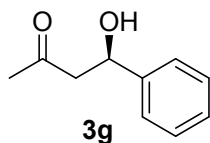

#### 4-Hydroxy-4-phenylbutan-2-one:[1]

$^1\text{H}$  NMR (300 MHz,  $\text{CDCl}_3$ , 25 °C, TMS):  $\delta$ =2.21 (s, 3H), 2.83 (dd, 1H,  $J(\text{H,H})=3.3, 17.7$  Hz), 2.90 (dd, 1H,  $J(\text{H,H})=9.0, 17.7$  Hz), 5.16 (dd, 1H,  $J(\text{H,H})=3.3, 9.0$  Hz), 7.29 ppm (m, 5H).  $^{13}\text{C}$  NMR (75 MHz,  $\text{CDCl}_3$ , 25 °C, TMS): 30.8, 50.2, 69.8, 125.6, 128.6, 127.7, 128.5, 142.6, 209.3 ppm.

The enantiomeric excess was determined by HPLC with a Chiralcel AS column at 210 nm (*n*-hexane/*i*-PrOH: 90/10, 1.0 mL/min),  $t_{\text{R}} = 11.5$  (major),  $t_{\text{R}} = 14.1$  (minor).

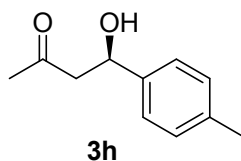

#### 4-Hydroxy-4-(4-tolyl)butan-2-one:[3]

$^1\text{H}$  NMR (300 MHz,  $\text{CDCl}_3$ , 25 °C, TMS):  $\delta$ =2.20 (s, 3H), 2.35 (s, 3H), 2.82 (d,  $J(\text{H,H})=3.0$  Hz, 2H), 3.33 (br s, 1H), 5.12 (d,  $J(\text{H,H})=3.0$  Hz, 1H), 7.17 (d,  $J(\text{H,H})=8.9$  Hz, 2H), 7.26 ppm (d,  $J(\text{H,H})=8.9$  Hz, 2H).  $^{13}\text{C}$  NMR (75 MHz,  $\text{CDCl}_3$ , 25 °C, TMS):  $\delta$ =21.1, 30.8, 52.0, 69.7, 125.6, 128.2, 129.7, 137.4, 209.2 ppm.

The enantiomeric excess was determined by HPLC with a Chiralcel IA column at 280 nm (*n*-hexane/*i*-PrOH: 95/5, 1.0 mL/min),  $t_{\text{R}} = 10.5$  (minor),  $t_{\text{R}} = 12.6$  (major).

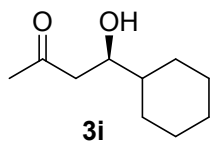

#### 4-Hydroxy-4-(cyclohexyl)butan-2-one:[3]

$^1\text{H}$  NMR (300 MHz,  $\text{CDCl}_3$ , 25  $^\circ\text{C}$ , TMS):  $\delta$ =0.95-1.25 (m, 6h), 1.61-1.76 (m, 5H), 2.18 (s, 3H), 2.53 (m, 2H), 2.89 (br s, 1H), 3.82 (m, 1H) ppm.  $^{13}\text{C}$  NMR (75 MHz,  $\text{CDCl}_3$ , 25  $^\circ\text{C}$ , TMS):  $\delta$ =25.8, 26.2, 26.5, 28.1, 29.0, 30.7, 42.9, 47.7, 71.9, 210.7 ppm.

The enantiomeric excess was determined by HPLC with a Chiralcel AS column at 210 nm (*n*-hexane/*i*-PrOH: 90/10, 1.0 mL/min),  $t_{\text{R}} = 9.5$  (major),  $t_{\text{R}} = 11.3$  (minor).

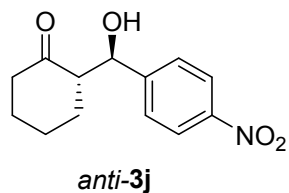

### 2-[Hydroxy(4-nitrophenyl)methyl]cyclohexanone:[3]

$^1\text{H}$  NMR (300 MHz,  $\text{CDCl}_3$ , 25  $^\circ\text{C}$ , TMS):  $\delta$ =1.28-1.49 (m, 1H), 1.52-1.73 (m, 3H), 1.79-1.83 (m, 1H), 2.06-2.14 (m, 1H), 2.21-2.31 (m, 1H), 2.33-2.50 (m, 1H), 2.54-2.63 (m, 1H), 3.12 (br s, 1H *syn*), 4.02 (br s, 1H *anti*), 4.88 (d,  $J(\text{H,H})=8.4$  Hz, 1H *anti*), 5.46 (s, 1H *syn*), 7.49 (d,  $J(\text{H,H})=8.7$  Hz, 2H), 8.19 ppm (d,  $J(\text{H,H})=8.7$  Hz, 2H).  $^{13}\text{C}$  NMR (75 MHz,  $\text{CDCl}_3$ , 25  $^\circ\text{C}$ , TMS):  $\delta$ =*anti* 24.6, 27.5, 30.6, 42.6, 57.1, 73.9, 123.5, 127.8, 147.4, 148.3, 214.6.

The enantiomeric excess was determined by HPLC with a Chiralcel ADH column at 254 nm (*n*-hexane/*i*-PrOH: 90/10, 1.0 mL/min), *anti*:  $t_{\text{R}} = 19.1$  (minor),  $t_{\text{R}} = 25.1$  (major), *syn*:  $t_{\text{R}} = 15.0$  (minor),  $t_{\text{R}} = 17.1$  (major).

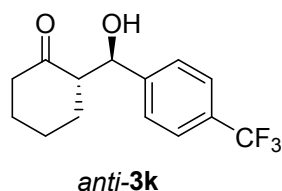

### 2-[Hydroxy(4-(trifluoromethyl)phenyl)methyl]cyclohexanone:[4]

$^1\text{H}$  NMR (300 MHz,  $\text{CDCl}_3$ , 25  $^\circ\text{C}$ , TMS):  $\delta$ =1.49-1.83 (m, 5H), 2.05-2.10 (m, 1H), 2.30-2.48 (m, 2H), 2.65-2.71 (m, 1H), 4.05 (d,  $J(\text{H,H})=4.0$  Hz, 1H), 5.35 (dd,  $J(\text{H,H})=4.0, 8.2$  Hz, 1H), 7.49 (d,  $J(\text{H,H})=8.7$  Hz, 2H), 8.19 ppm (d,  $J(\text{H,H})=8.7$  Hz, 2H).  $^{13}\text{C}$  NMR (75 MHz,  $\text{CDCl}_3$ , 25  $^\circ\text{C}$ , TMS):  $\delta$ =*anti* 24.8, 27.8, 30.3, 42.6, 57.5, 70.3, 127.1, 128.1, 128.6, 129.1, 132.8, 139.0, 215.1 ppm.

The enantiomeric excess was determined by HPLC with a Chiralcel AD column at 210 nm (*n*-hexane/*i*-PrOH: 90/10, 1.0 mL/min), *anti*:  $t_{\text{R}} = 20.5$  (minor),  $t_{\text{R}} = 26.3$  (major), *syn*:  $t_{\text{R}} = 13.9$  (minor),  $t_{\text{R}} = 16.2$  (minor).

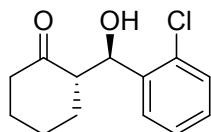

*anti*-3l

**2-[(2-Chlorophenyl)hydroxymethyl]cyclohexanone:[4]**

<sup>1</sup>H NMR (300 MHz, CDCl<sub>3</sub>, 25 °C, TMS): δ=1.49-1.83 (m, 5H), 2.05-2.10 (m, 1H), 2.30-2.48 (m, 2), 2.65-2.71 (m, 1H), 4.05 (d, *J*(H,H)=3.9 Hz, 1H), 5.35 (dd, *J*(H,H)=3.9, 8.1 Hz, 1H), 7.18-7.22 (m, 1H), 7.27-7.34 (m, 2H), 7.54-7.56 ppm (m, 1H). <sup>13</sup>C NMR (75 MHz, CDCl<sub>3</sub>, 25 °C, TMS): δ=*anti* 25.0, 27.8, 30.6, 42.7, 57.6, 72.9, 123.4, 127.9, 128.5, 129.1, 132.5, 140.7, 215.2 ppm.

The enantiomeric excess was determined by HPLC with a Chiralcel ODH column at 280 nm (*n*-hexane/*i*-PrOH: 95/5, 1.0 mL/min), *anti*: *t*<sub>R</sub> = 8.5 (major), *t*<sub>R</sub> = 10.8 (minor), *syn*: *t*<sub>R</sub> = 6.4 (minor), *t*<sub>R</sub> = 7.9 (major).

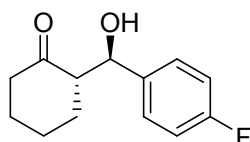

*anti*-3m

**2-[Hydroxy-(4-(fluorophenyl)methyl)-cyclohexanone:[5]**

<sup>1</sup>H NMR (300 MHz, CDCl<sub>3</sub>, 25 °C, TMS): δ=□1.22-2.08 (m, 6H), 2.31-2.65 (m, 3H), 4.03 (br s, 1H), 4.77 (d, *J*(H,H)=8.4 Hz, 1H), 7.03 (d, *J*(H,H)=8.7 Hz, 2H), 7.33 ppm (d, *J*(H,H)=8.7 Hz, 2H). <sup>13</sup>C NMR (75 MHz, CDCl<sub>3</sub>, 25 °C, TMS): δ=*anti* 24.6, 27.7, 30.7, 42.6, 57.4, 74.1, 115.2, 128.5, 136.5, 162.6, 215.4 ppm.

The enantiomeric excess was determined by HPLC with a Chiralcel ADH column at 210 nm (*n*-hexane/*i*-PrOH: 90/10, 0.3 mL/min), *anti*: *t*<sub>R</sub> = 42.6 (minor), *t*<sub>R</sub> = 47.3 (major), *syn*: *t*<sub>R</sub> = 28.8 (minor), *t*<sub>R</sub> = 32.9 (major).

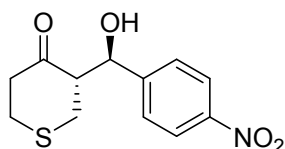

*anti*-3n

**3-hydroxy(4-nitrophenyl)methyl)tetrahydro-4H-thiopyran-4-one:[6]**

<sup>1</sup>H NMR (300 MHz, CDCl<sub>3</sub>, 25 °C, TMS): δ=□2.48-2.55 (m, 1H), 2.65 (t, *J*(H,H)=12.2 Hz, 1H), 2.71-2.84 (m, 2H), 2.96-3.05 (m, 3H), 3.67 (br s, 1H), 5.05 (d, *J*(H,H)=7.9 Hz, 1H, *anti*), 5.52 (br s, 1H, *syn*),

7.55 (d,  $J(\text{H,H})=8.8$  Hz, 2H), 8.24 ppm (d,  $J(\text{H,H})=8.8$  Hz, 2H).  $^{13}\text{C}$  NMR (75 MHz,  $\text{CDCl}_3$ , 25 °C, TMS):  $\delta=anti$  30.7, 32.8, 44.7, 59.4, 73.1, 123.8, 127.7, 147.6, 147.7, 211.2 ppm.

The enantiomeric excess was determined by HPLC with a Chiralcel AD column at 280 nm (*n*-hexane/*i*-PrOH: 90/10, 1.0 mL/min), *anti*:  $t_R = 38.6$  (minor),  $t_R = 69.2$  (major). *syn*:  $t_R = 29.6$  (major),  $t_R = 59.4$  (minor).

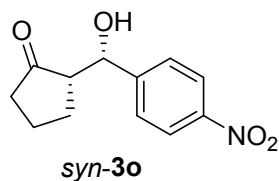

### 2-[Hydroxy(4-nitrophenyl)methyl]cyclopentanone:[3]

$^1\text{H}$  NMR (300 MHz,  $\text{CDCl}_3$ , 25 °C, TMS):  $\delta=$  1.72-1.75 (m, 2H), 1.96-2.09 (m, 1H), 2.30-2.74 (m, 2H), 2.74 (d,  $J(\text{H,H})=4.8$  Hz, 1H, *syn*), 4.77 (br s, 1H, *anti*), 4.84 (d,  $J(\text{H,H})=9.1$  Hz, 1H, *syn*), 5.42 (s, 1H), 7.52 (d,  $J(\text{H,H})=8.4$  Hz, 2H), 8.21 ppm (d,  $J(\text{H,H})=8.7$  Hz, 2H).  $^{13}\text{C}$  NMR (75 MHz,  $\text{CDCl}_3$ , 25 °C, TMS):  $\delta=anti$  20.2, 22.2, 38.8, 56.0, 70.3, 123.6, 126.3, 147.0, 150.2, 219.6; *syn* 20.2, 26.7, 38.5, 55.0, 74.3, 123.5, 127.3, 147.2, 148.5, 219.7 ppm.

The enantiomeric excess was determined by HPLC with a Chiralcel AD column at 280 nm (*n*-hexane/*i*-PrOH: 96/4, 1.0 mL/min), *syn*:  $t_R = 31.4$  (major),  $t_R = 46.0$  (minor). *anti*:  $t_R = 55.9$  (minor),  $t_R = 58.9$  (major).

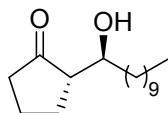

### 2-(-1-hydroxyundecyl)cyclopentan-1-one:[7]

$^1\text{H}$  NMR (300 MHz,  $\text{CDCl}_3$ , 25 °C, TMS):  $\delta=$  0.83 (t,  $J(\text{H,H})=6.6$  Hz, 3H), 1.23 (br s, 2H), 1.36-2.29 (m, 22H), 4.03 ppm (dt,  $J(\text{H,H})=3, 6.6$  Hz, 1H).  $^{13}\text{C}$  NMR (75 MHz,  $\text{CDCl}_3$ , 25 °C, TMS):  $\delta=$  14.1, 20.6, 22.8, 26.0, 29.3, 29.4, 29.45, 29.5, 29.6, 31.8, 34.8, 39.1, 54.4, 96.5, 221.7 ppm.

The enantiomeric excess was determined by HPLC with a Chiralcel IA column at 254 nm (*n*-hexane/*i*-PrOH: 99/1, 1.0 mL/min), *syn*:  $t_R = 8.6$  (minor),  $t_R = 10.5$  (major). *anti*:  $t_R = 14.8$  (major),  $t_R = 20.6$  (minor).

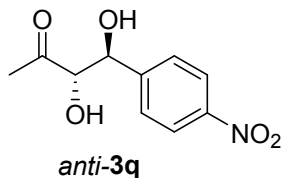



### 3,4-Dihydroxy-4-(4-nitrophenyl)butan-2-one:[8]

$^1\text{H}$  NMR (300 MHz,  $\text{CDCl}_3$ , 25 °C, TMS):  $\delta$  = 2.02 (s, 3H), 3.03 (d,  $J(\text{H,H})=4.3$  Hz, 1H), 3.71 (d,  $J(\text{H,H})=4.9$  Hz, 1H), 4.60-4.91 (m, 1H), 5.08-5.11 (m, 1H), 7.62 (d,  $J(\text{H,H})=8.4$  Hz, 2H), 8.24 ppm (d,  $J(\text{H,H})=8.9$  Hz, 2H).  $^{13}\text{C}$  NMR (75 MHz,  $\text{CDCl}_3$ , 25 °C, TMS):  $\delta$  = 27.7, 74.3, 80.5, 123.7, 127.0, 146.3, 147.3, 207.2 ppm.

The enantiomeric excess was determined by HPLC with a Chiralcel ADH column at 254 nm (*n*-hexane/*i*-PrOH: 80/20, 0.8 mL/min), *anti*:  $t_{\text{R}} = 10.5$  (minor),  $t_{\text{R}} = 11.7$  (major), *syn*:  $t_{\text{R}} = 13.4$  (major),  $t_{\text{R}} = 17.1$  (minor).

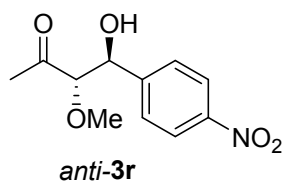

### 4-hydroxy-3-methoxy-4-(4-nitrophenyl)butan-2-one:[8]

$^1\text{H}$  NMR (300 MHz,  $\text{CDCl}_3$ , 25 °C, TMS):  $\delta$  = 2.16 (s, 3H), 3.20 (s, 1H), 3.32 (s, 3H), 3.70 (d,  $J(\text{H,H})=6.2$  Hz, 1H), 5.02 (d,  $J(\text{H,H})=6.2$  Hz, 1H), 7.56 (d,  $J(\text{H,H})=8.8$  Hz, 2H), 8.22 ppm (d,  $J(\text{H,H})=8.8$  Hz, 2H).  $^{13}\text{C}$  NMR (75 MHz,  $\text{CDCl}_3$ , 25 °C, TMS):  $\delta$  = 27.5, 59.6, 73.3, 89.6, 123.4, 127.7, 146.7, 147.7, 209.9 ppm.

The enantiomeric excess was determined by HPLC with a Chiralpak ODH column at 280 nm (*n*-hexane/*i*-PrOH: 90/10, 0.8 mL/min),  $t_{\text{R}} = 12.9$  (major),  $t_{\text{R}} = 15.7$  (minor).

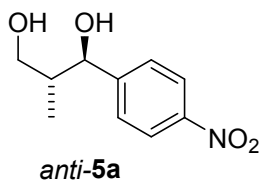

### 2-Methyl-1-(4-nitrophenyl)propane-1,3-diol:[9]

$^1\text{H}$  NMR (300 MHz,  $\text{CDCl}_3$ , 25 °C, TMS):  $\delta$  = 0.78 (d,  $J(\text{H,H})=7.0$  Hz, 3H), 2.01-2.06 (m, 1H), 2.74 (br s, 1H), 3.72-3.85 (m, 3H), 4.72 (d,  $J(\text{H,H})=7.8$  Hz, 1H *anti*), 7.54 (d,  $J(\text{H,H})=8.7$  Hz, 2H), 8.23 ppm (d,  $J(\text{H,H})=8.7$  Hz, 2H).  $^{13}\text{C}$  NMR (75 MHz,  $\text{CDCl}_3$ , 25 °C, TMS):  $\delta$  = 13.6, 41.5, 67.4, 79.3, 123.6, 127.5, 147.4, 150.5 ppm.

The enantiomeric excess was determined by HPLC with a Chiralpak AD column at 210 nm (*n*-hexane/*i*-PrOH: 97/3, 1.0 mL/min), *anti*:  $t_{\text{R}} = 89.6$  (major),  $t_{\text{R}} = 94.5$  (minor); *syn*:  $t_{\text{R}} = 79.3$  (major),  $t_{\text{R}} = 85.3$  (minor).

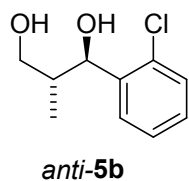

### 2-Methyl-1-(2'-chlorophenyl)propane-1,3-diol:[10]

$^1\text{H}$  NMR (300 MHz,  $\text{CDCl}_3$ , 25 °C, TMS):  $\delta$ =0.87 (t,  $J(\text{H,H})$ =7.2 Hz, 3H), 2.10-2.15 (m, 1H), 2.59-2.62 (m, 1H), 3.09 (d,  $J(\text{H,H})$ =3.9 Hz, 1H), 3.72-3.78 (m, 2H), 5.13 (dd,  $J(\text{H,H})$ =3.8 Hz, 7.2 Hz, 1H), 7.17-7.24 (m, 1H), 7.30-7.35 (m, 2H), 7.58-7.61 ppm (m, 1H).  $^{13}\text{C}$  NMR (75 MHz,  $\text{CDCl}_3$ , 25 °C, TMS):  $\delta$ =□13.6, 40.6, 67.4, 76.1, 127.1, 128.0, 128.6, 129.4, 132.4, 140.8 ppm.

The enantiomeric excess was determined by for the benzoylated product by HPLC with a Chiralpak AD column at 230 nm (*n*-hexane/*i*-PrOH: 97/3, 1.0 mL/min), *anti*:  $t_{\text{R}}$  = 39.1 (major),  $t_{\text{R}}$  = 60.5 (minor); *syn*:  $t_{\text{R}}$  = 23.8 (major),  $t_{\text{R}}$  = 32.7 (minor).

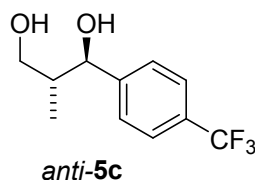

### 2-Methyl-1-(4-trifluoromethylphenyl)propane-1,3-diol:[10]

$^1\text{H}$  NMR (300 MHz,  $\text{CDCl}_3$ , 25 °C, TMS):  $\delta$ =0.72 (d,  $J(\text{H,H})$ =7.0 Hz, 3H), 2.01-2.03 (m, 1H), 2.89 (br s, 1H), 3.66-3.79 (m, 3H), 4.61 (d,  $J(\text{H,H})$ =7.9 Hz, 1H *anti*), 5.04 (br s, 1H, *syn*) 7.45 (d,  $J(\text{H,H})$ =8.1 Hz, 2H), 7.61 ppm (d,  $J(\text{H,H})$ =8.1 Hz, 2H).  $^{13}\text{C}$  NMR (75 MHz,  $\text{CDCl}_3$ , 25 °C, TMS):  $\delta$ =□13.6, 41.4, 67.6, 79.9, 125.2, 126.9, 130.0, 147.2.

The enantiomeric excess was determined by HPLC with a Chiralpak AD column at 230 nm (*n*-hexane/*i*-PrOH: 97/3, 1.0 mL/min), *anti*:  $t_{\text{R}}$  = 28.5 (major),  $t_{\text{R}}$  = 30.3 (minor); *syn*:  $t_{\text{R}}$  = 18.3 (major),  $t_{\text{R}}$  = 19.9 (minor).

# NMR spectra for aldol products

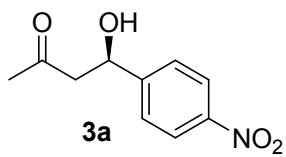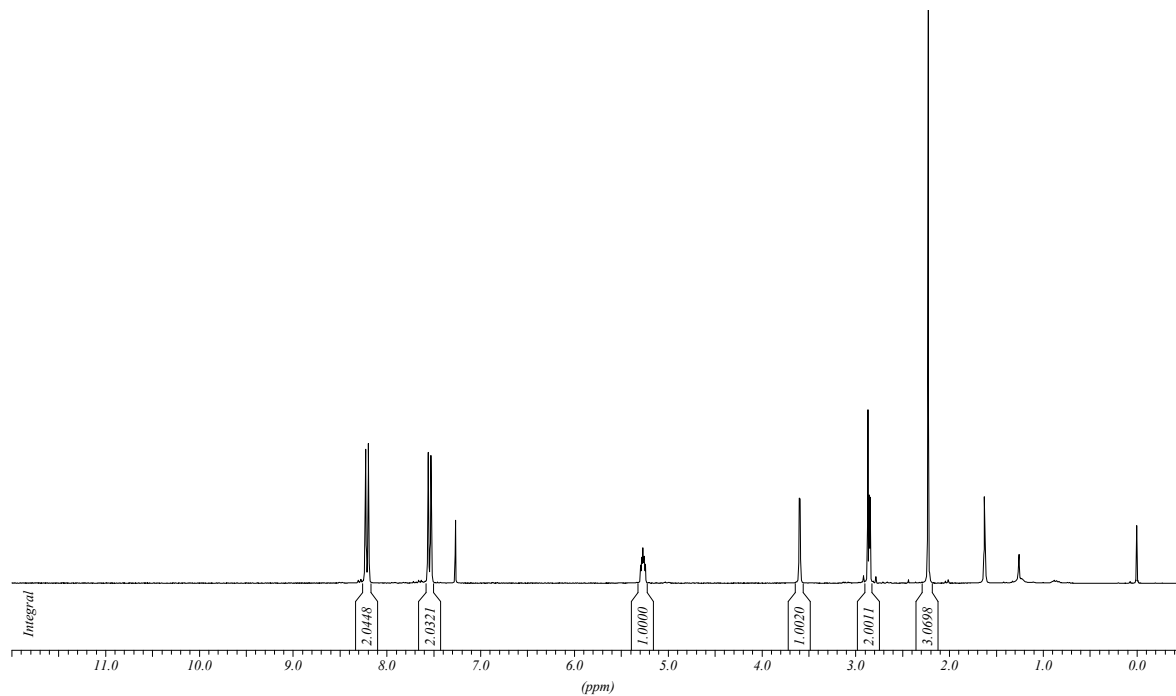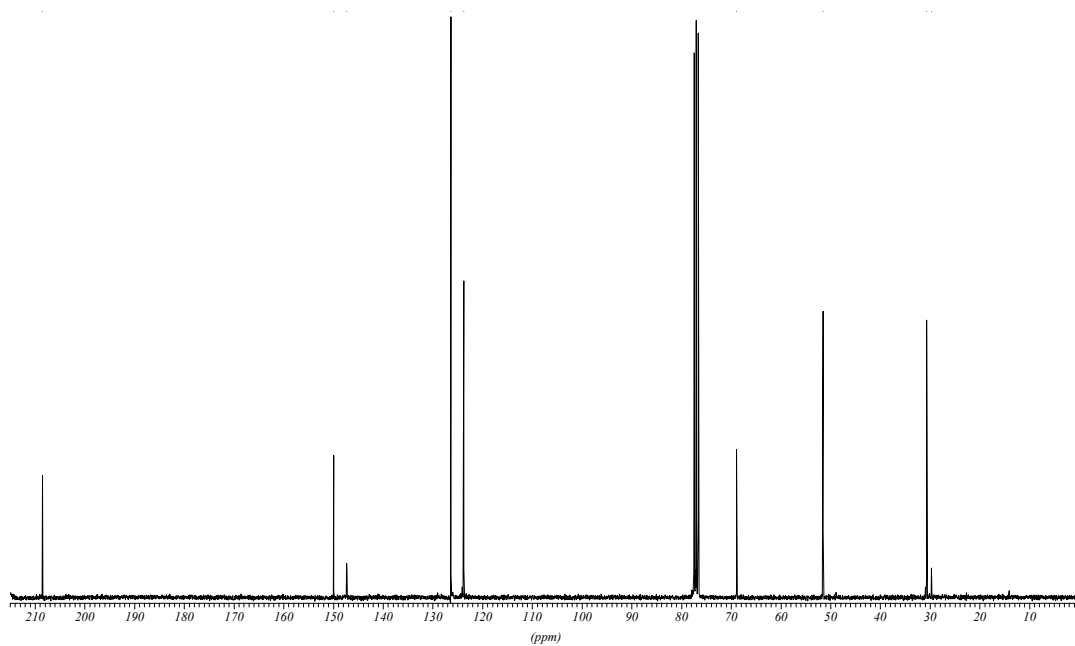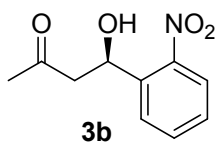

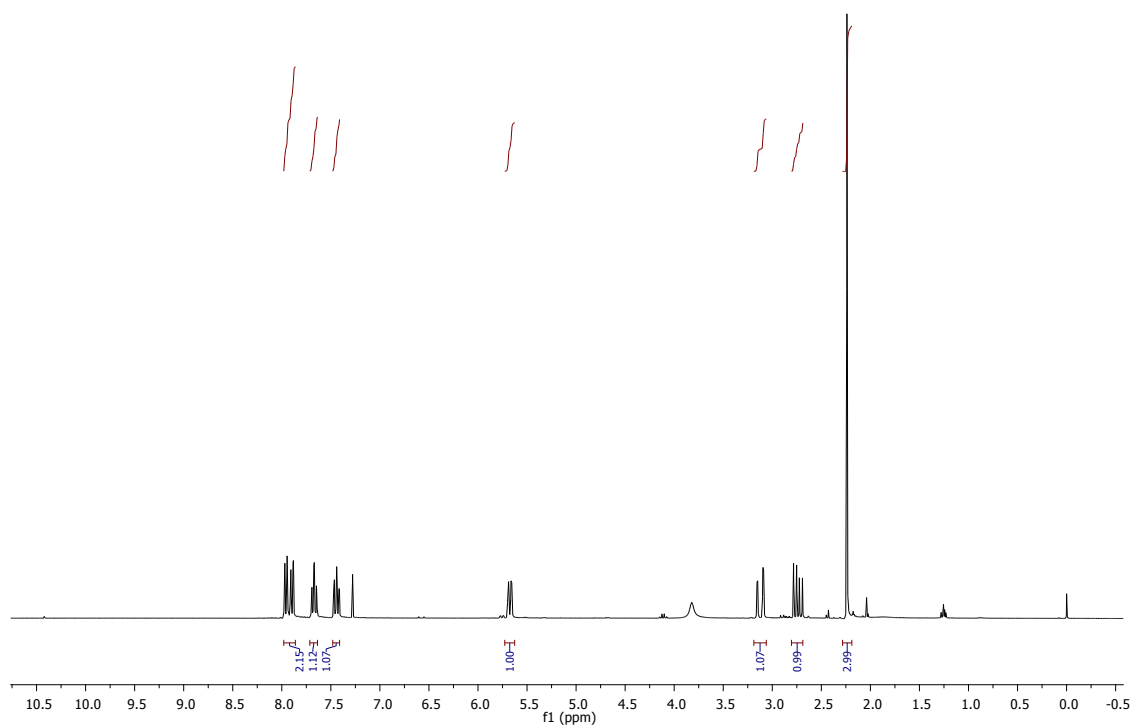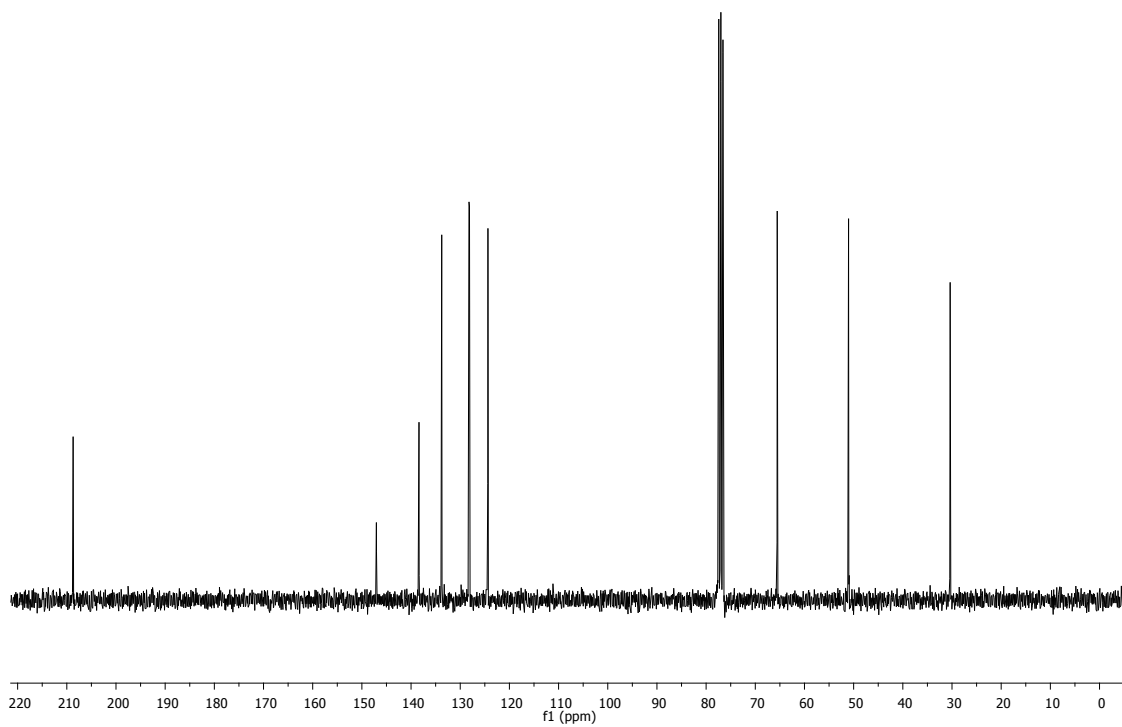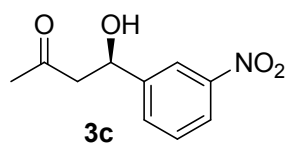

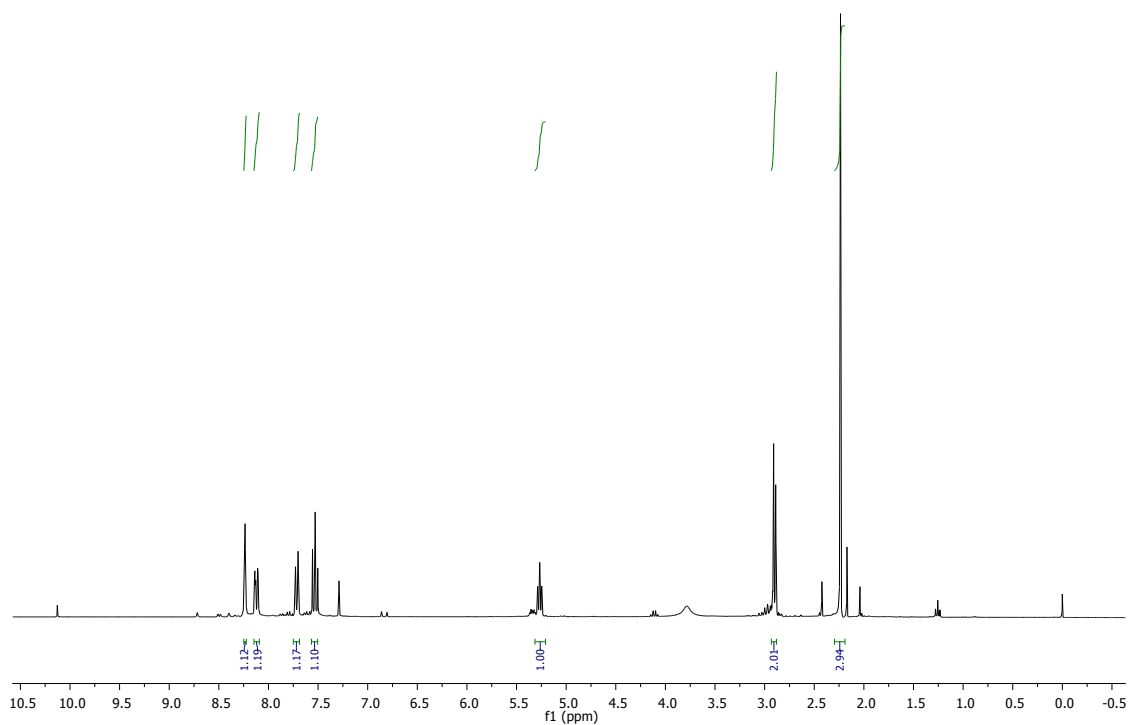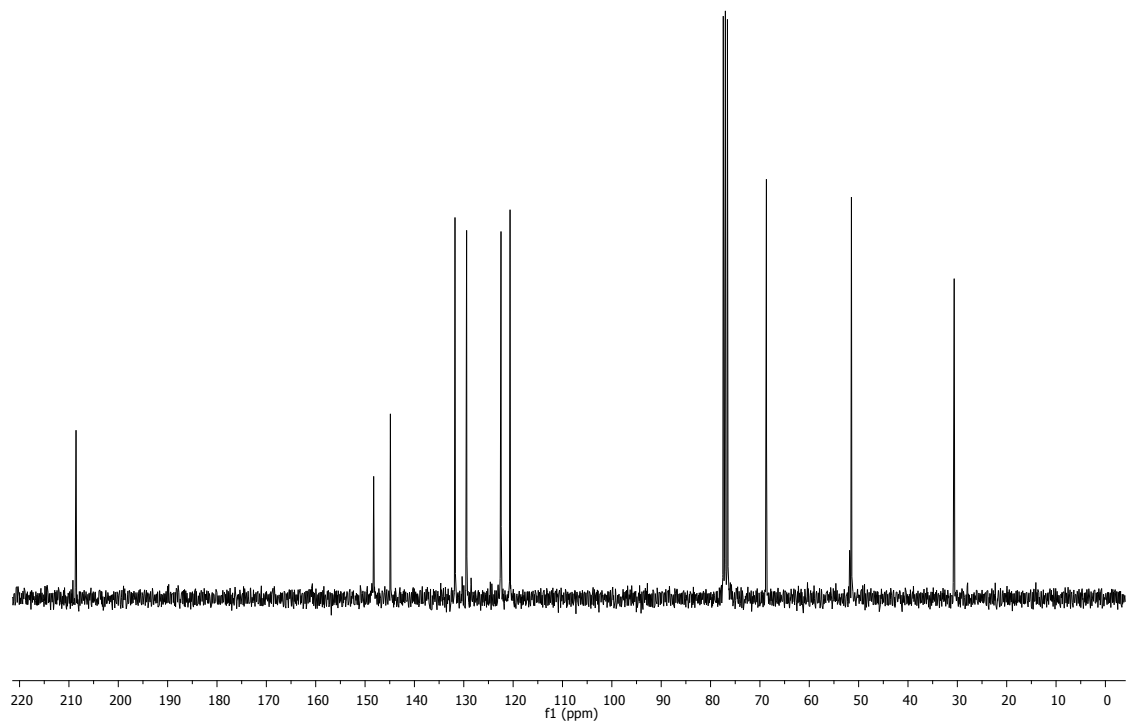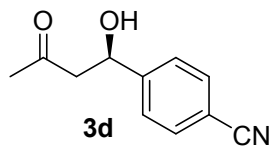

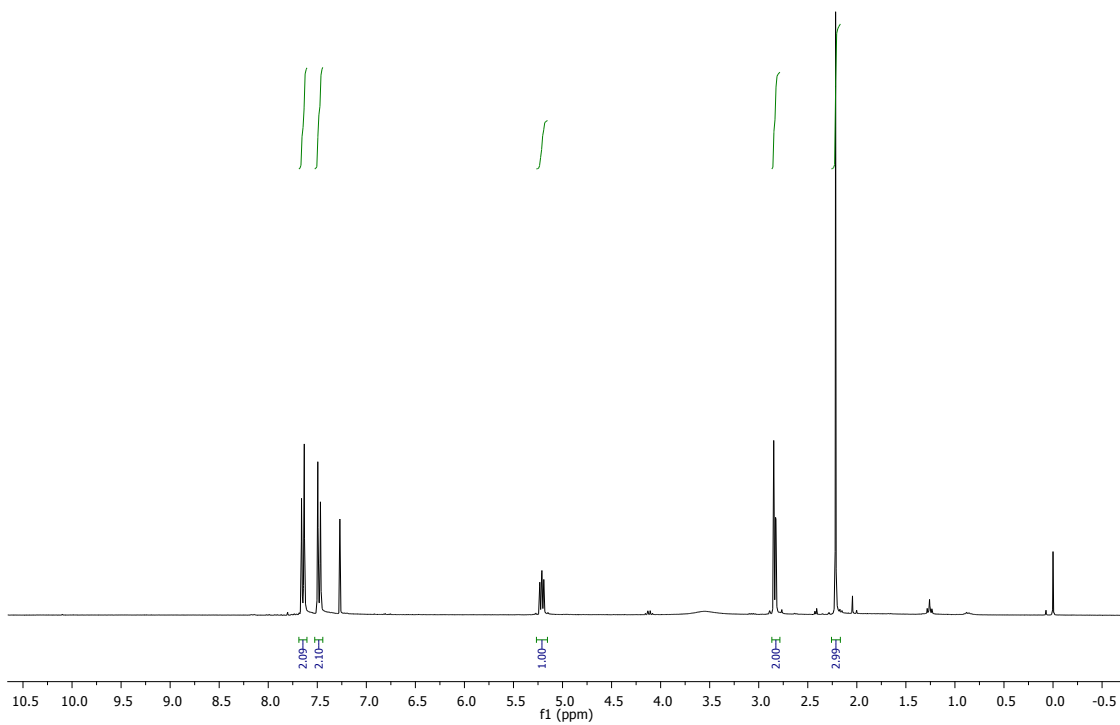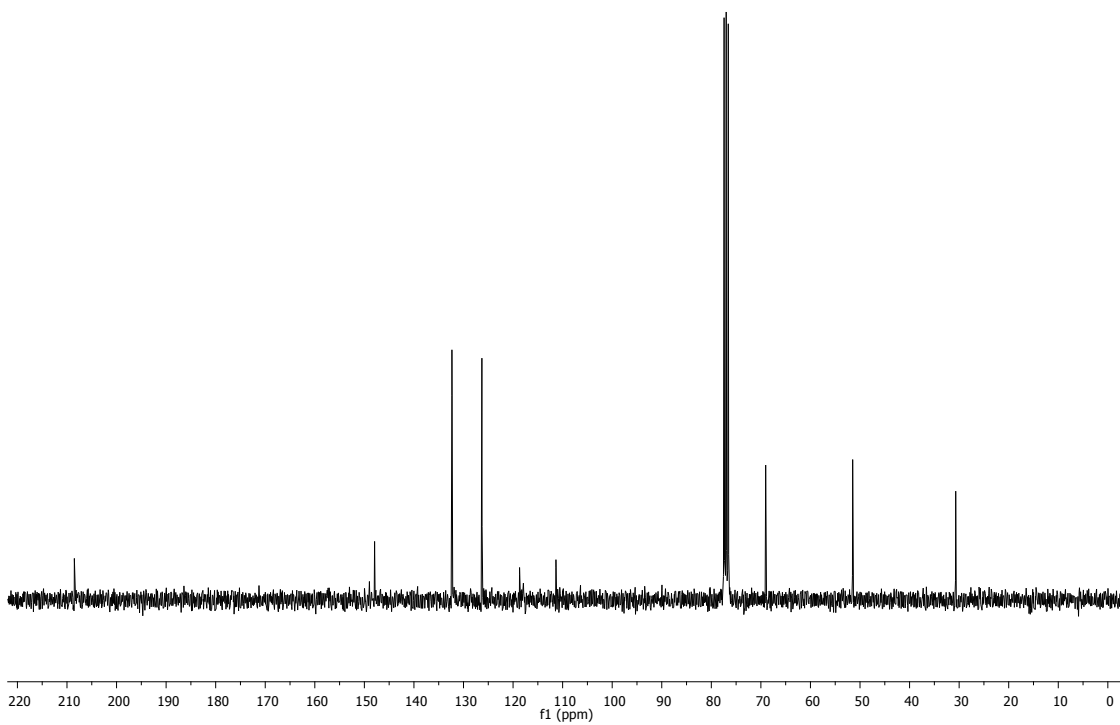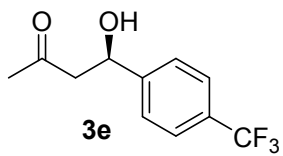

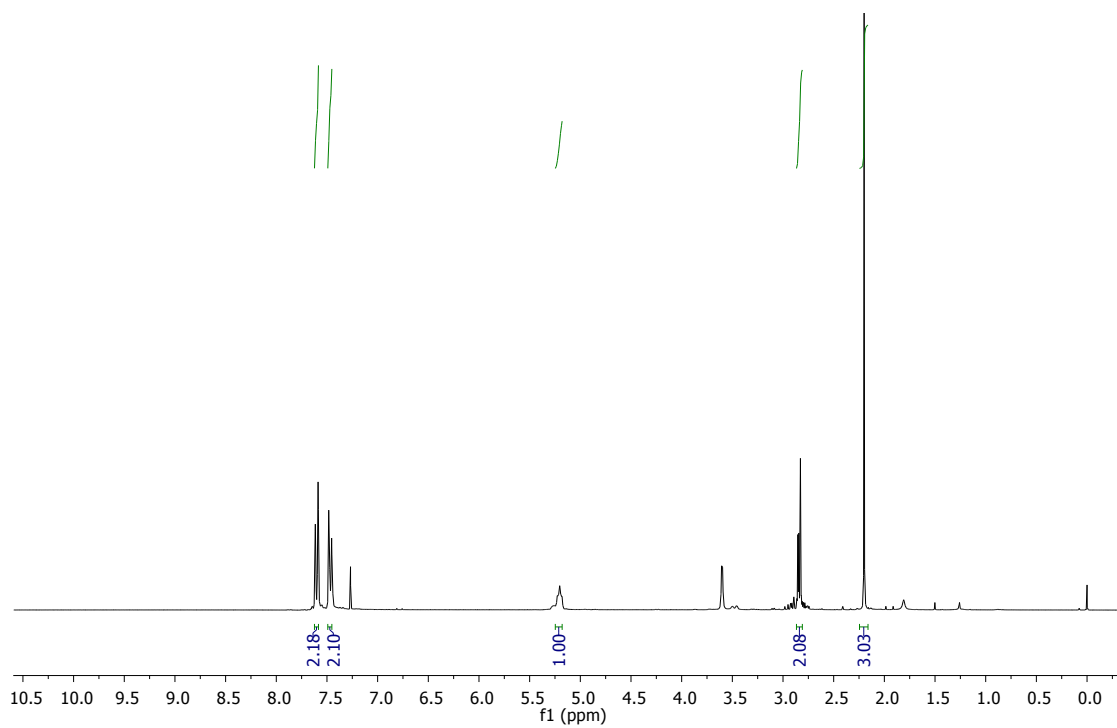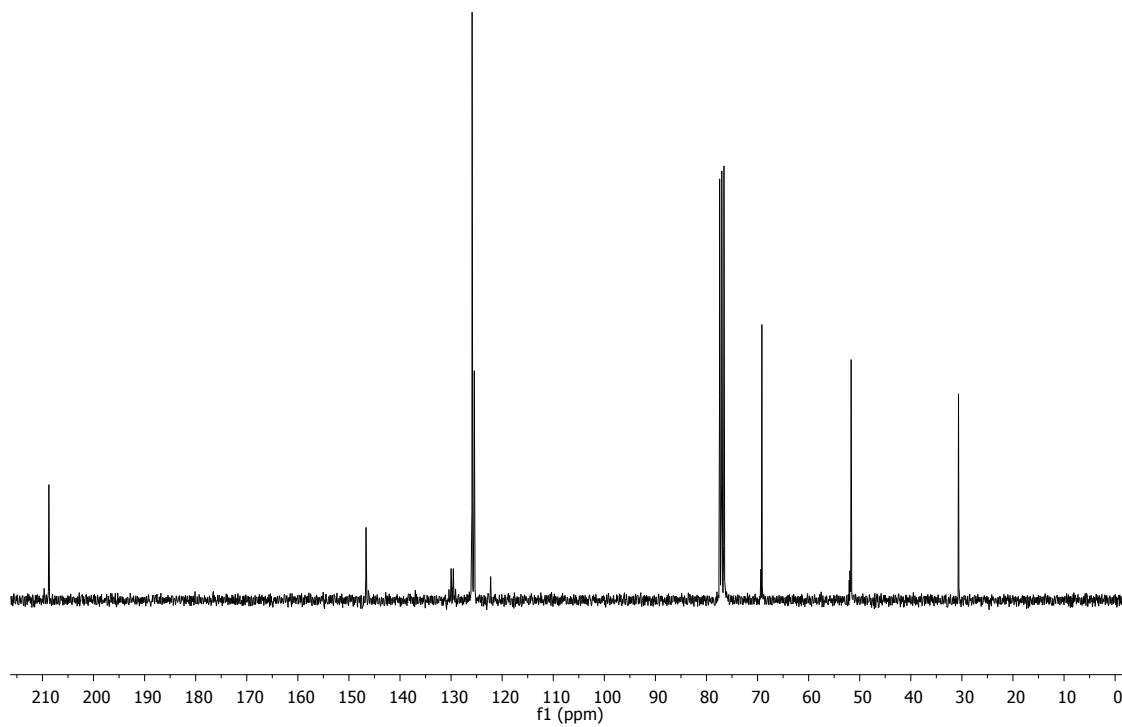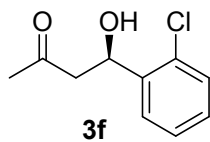

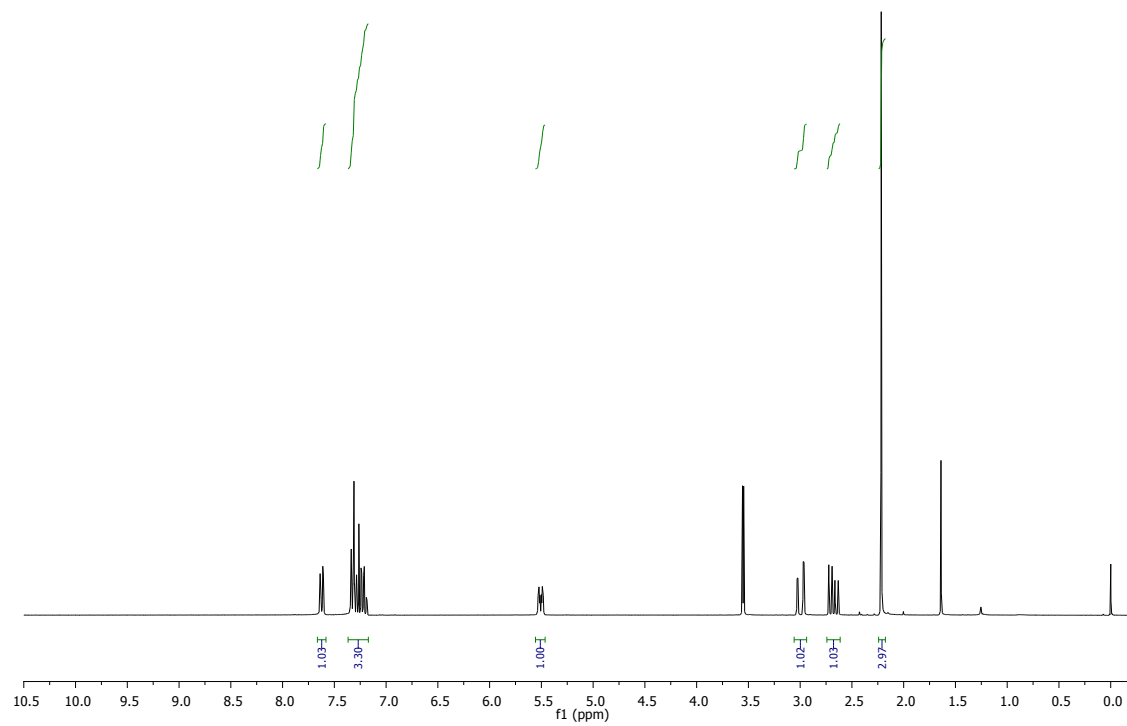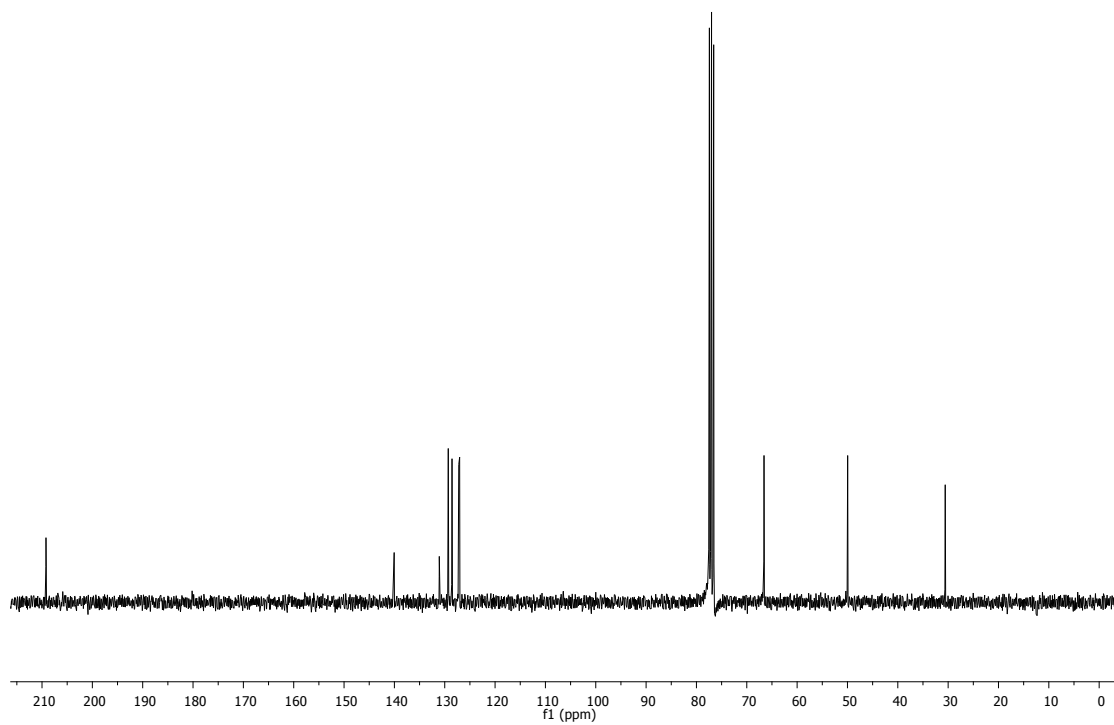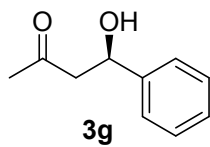



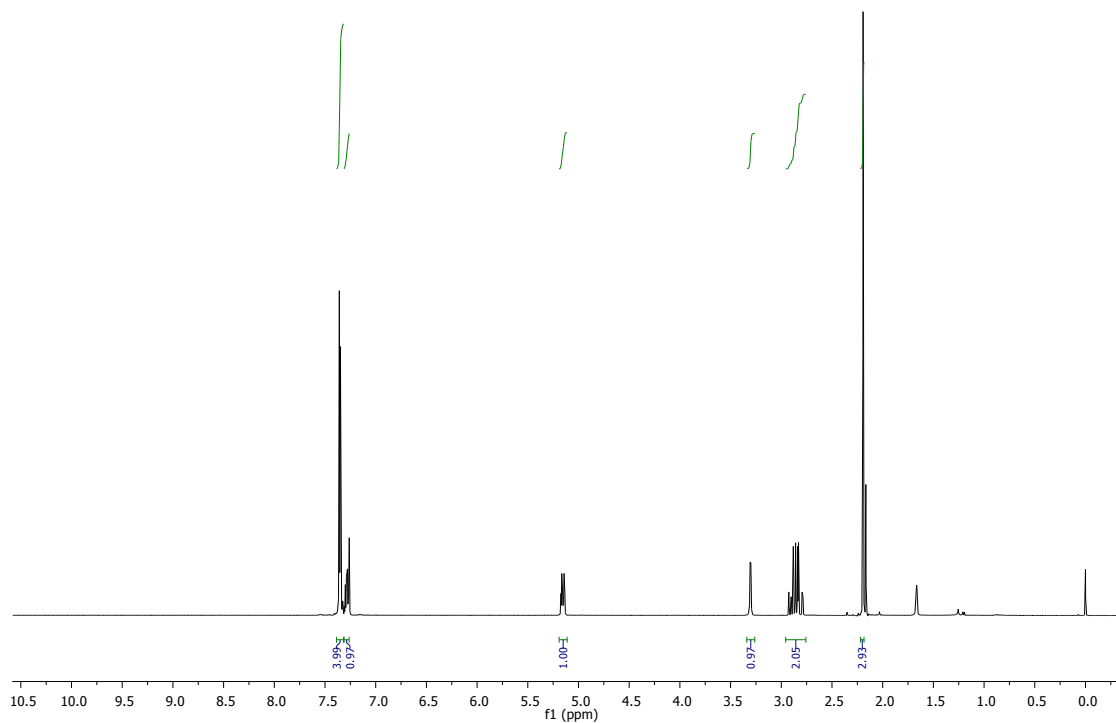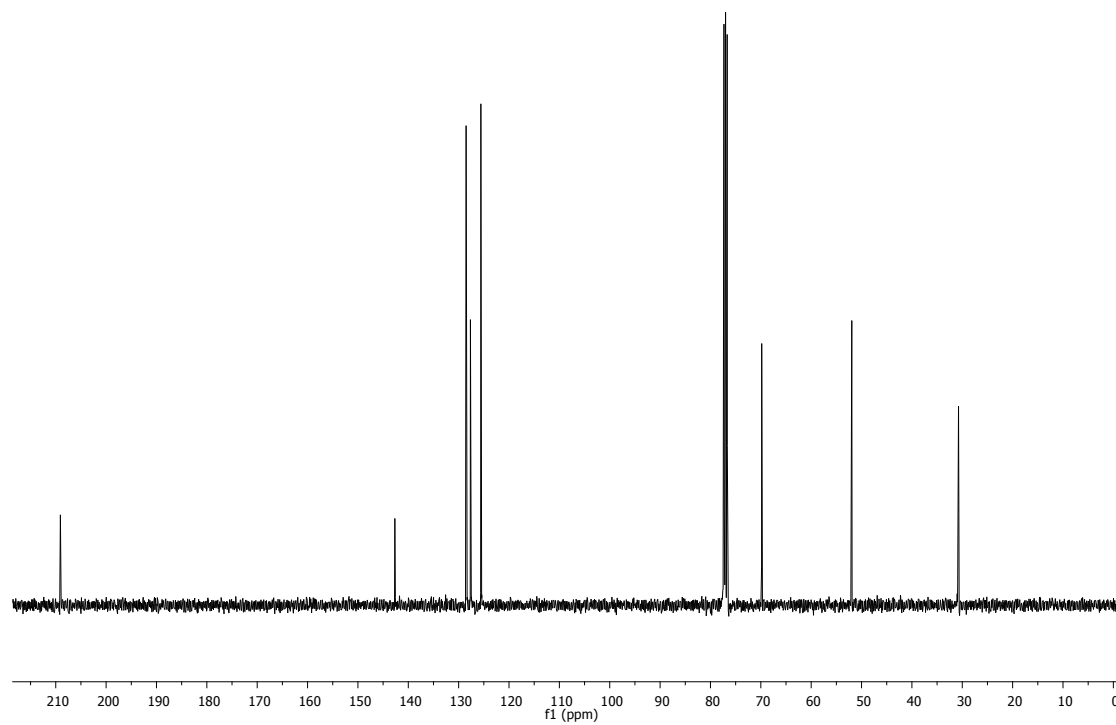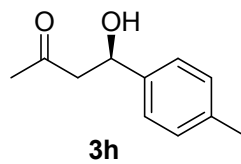

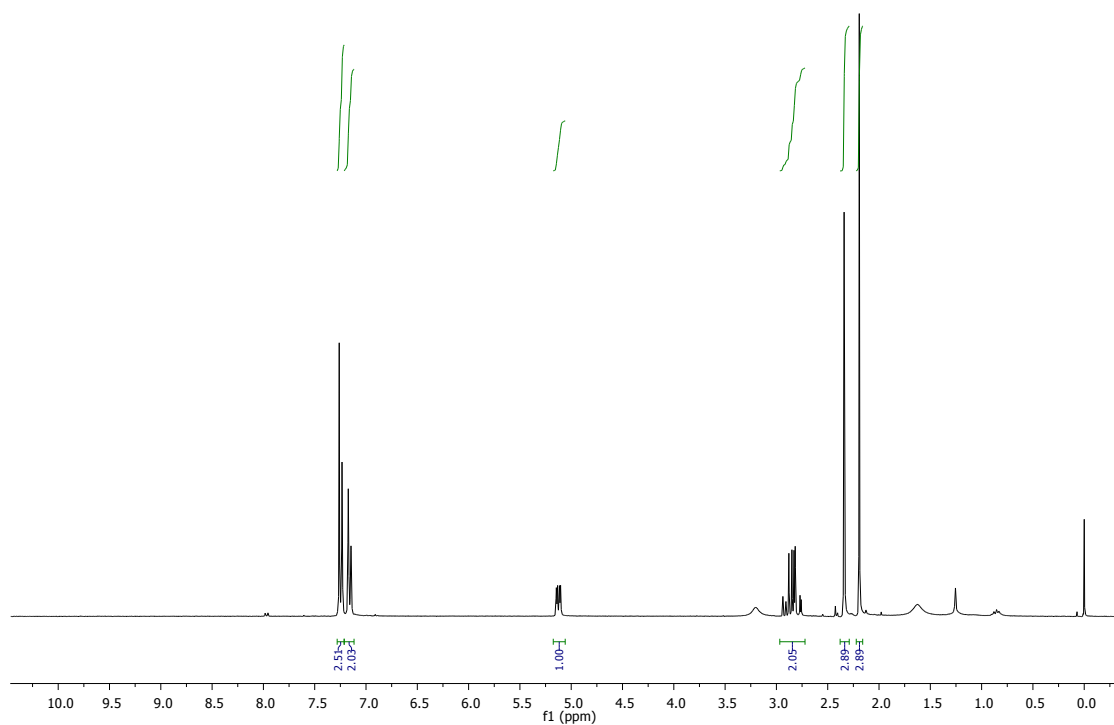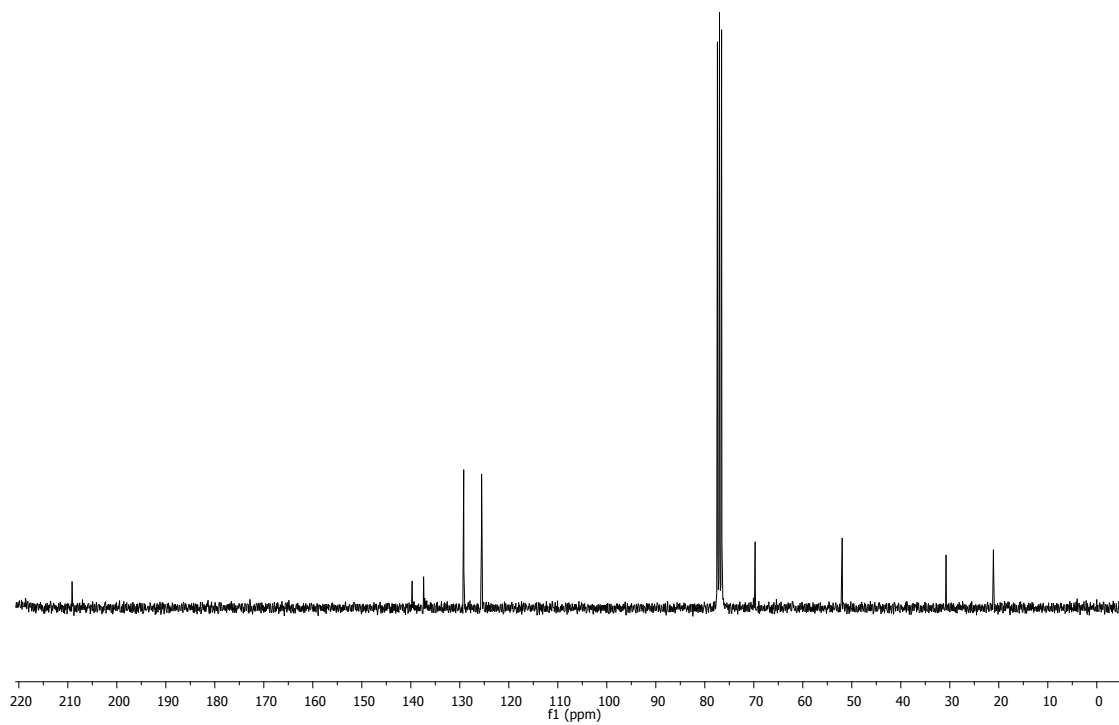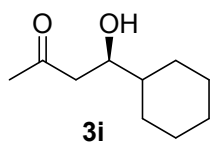

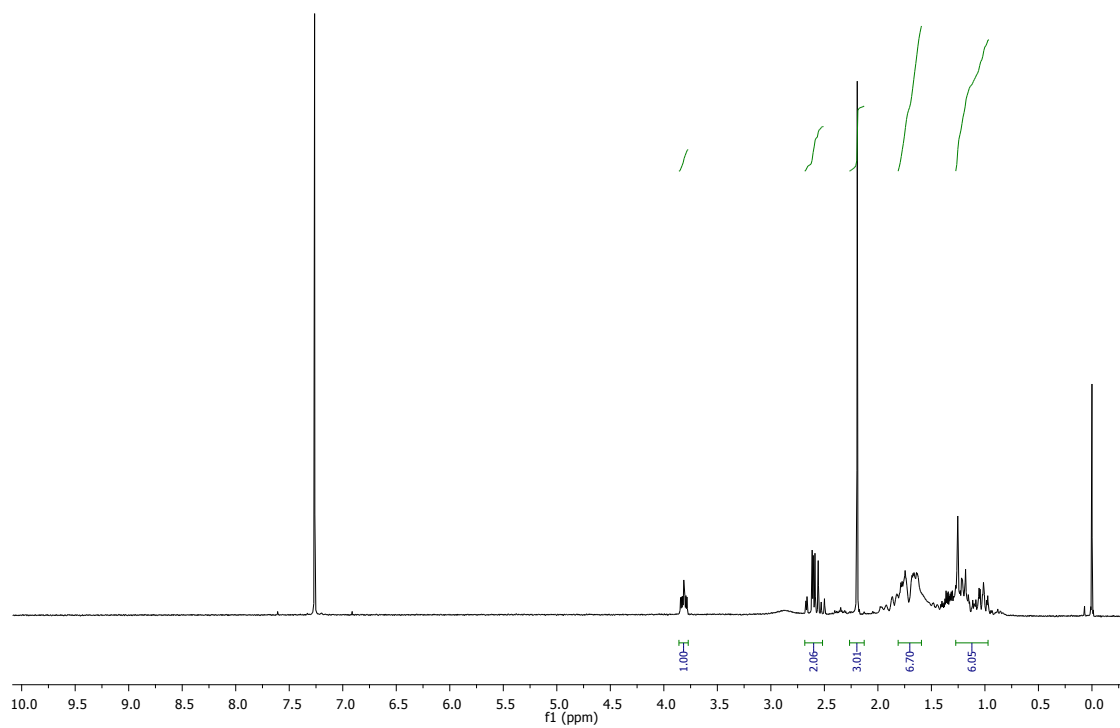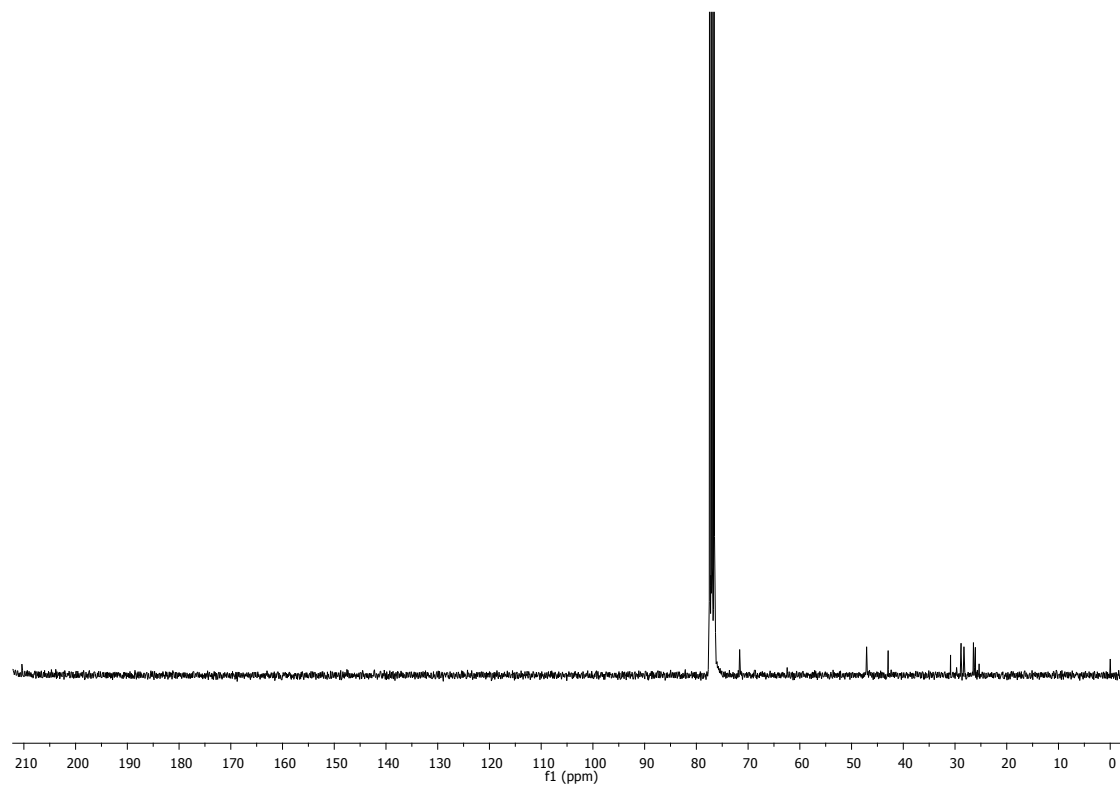

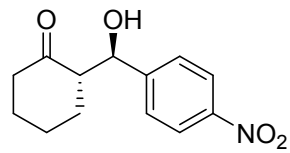

*anti-3j*

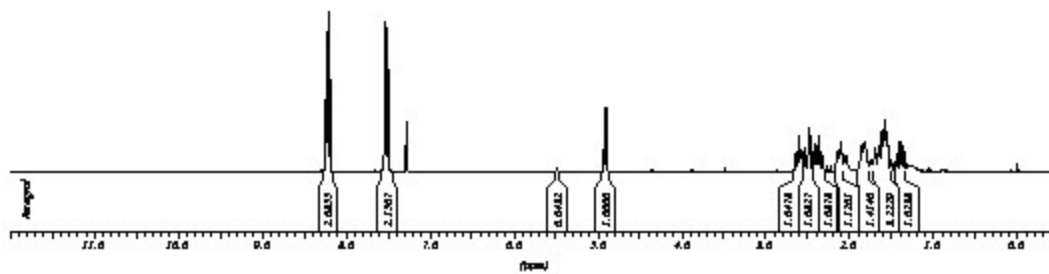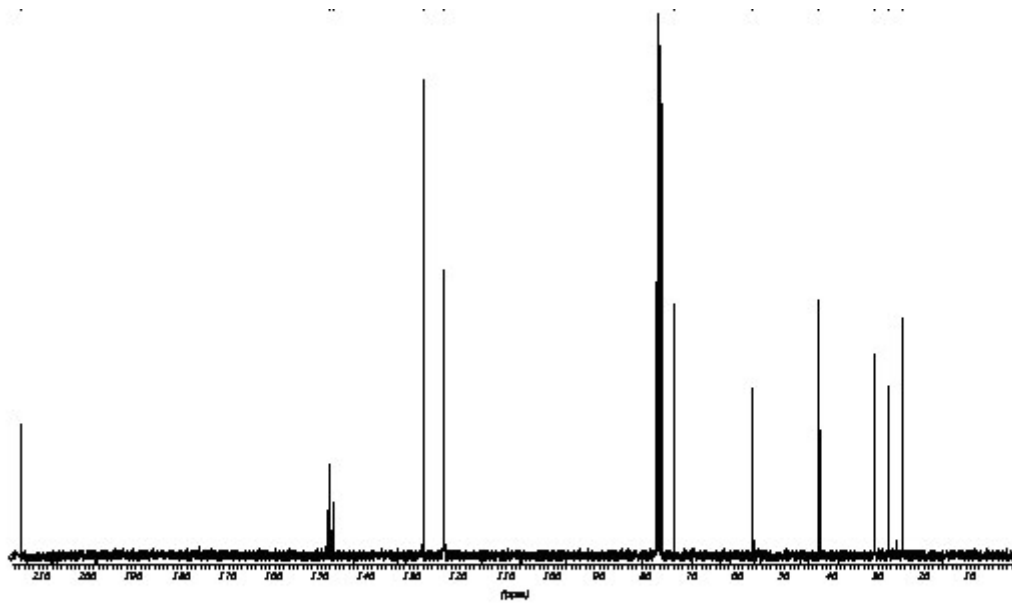

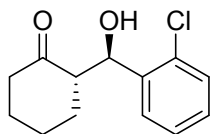

*anti*-3I

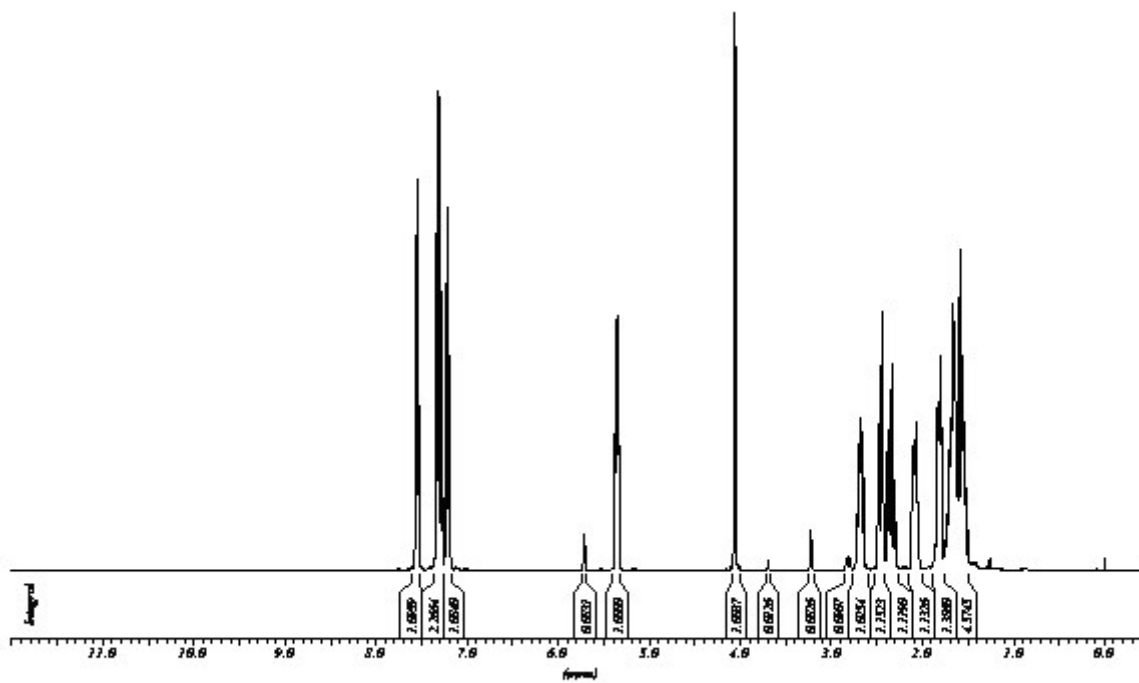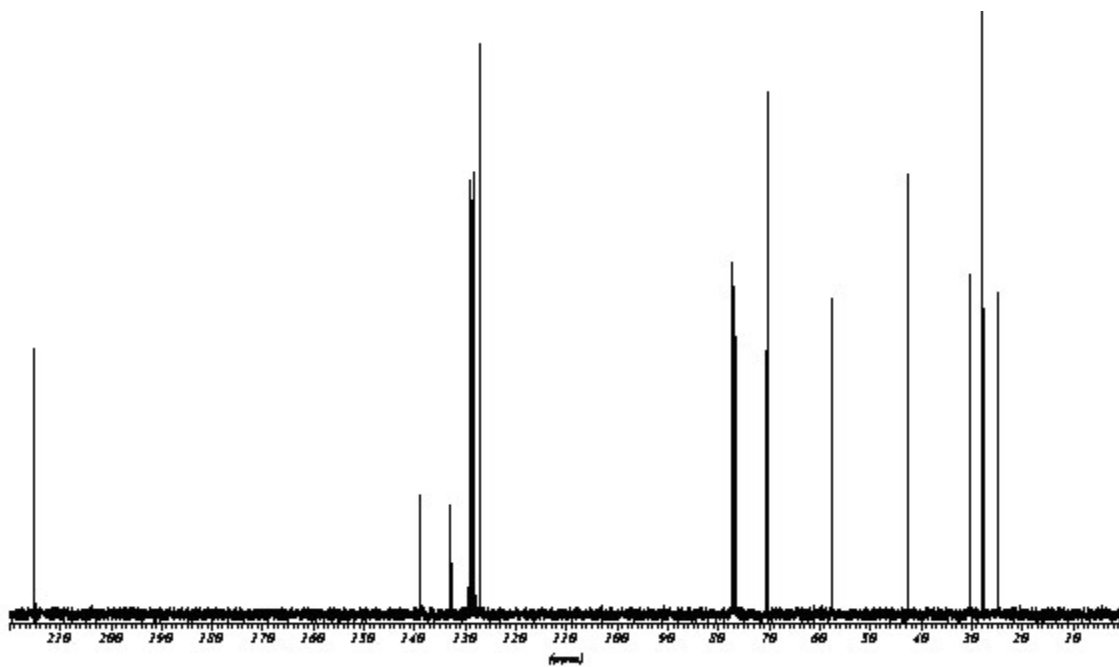

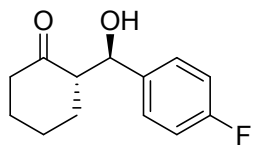

*anti*-3m

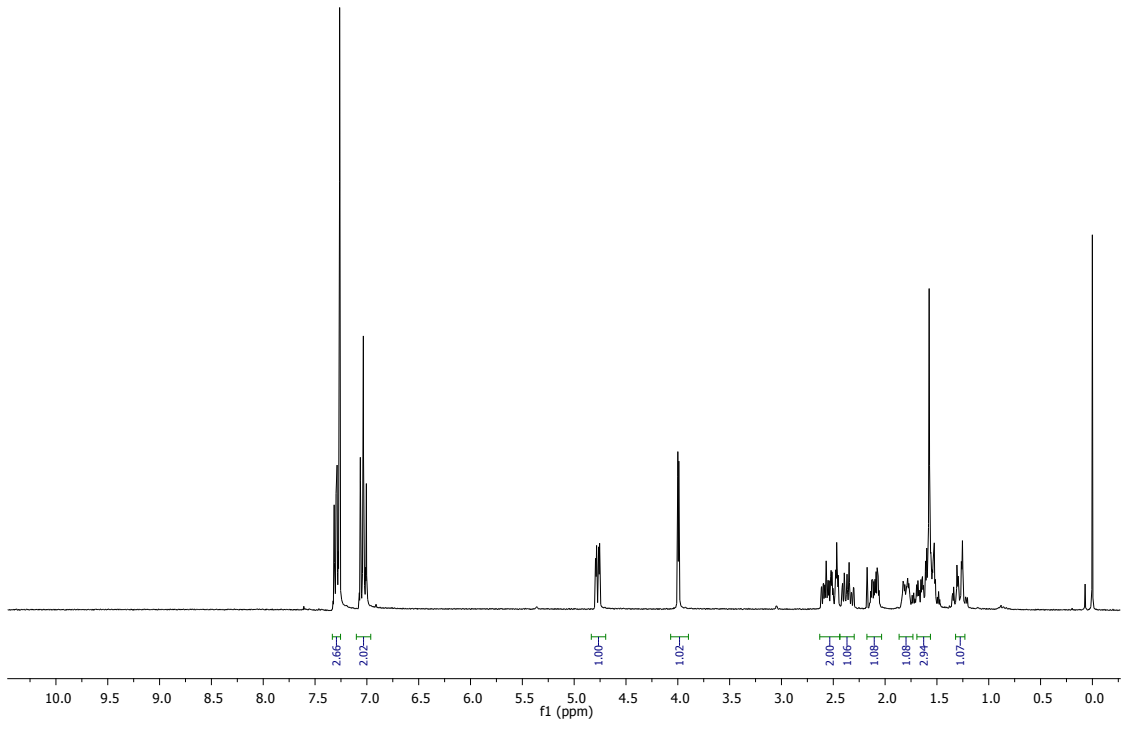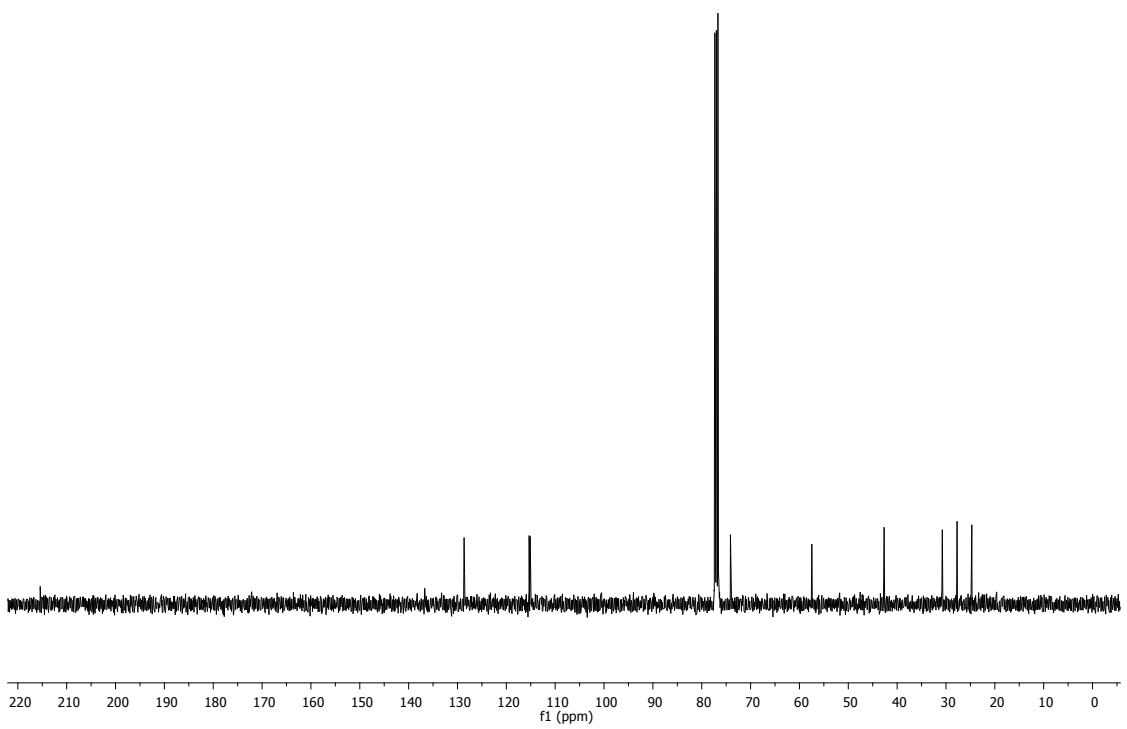

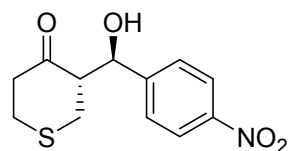

*anti*-3n

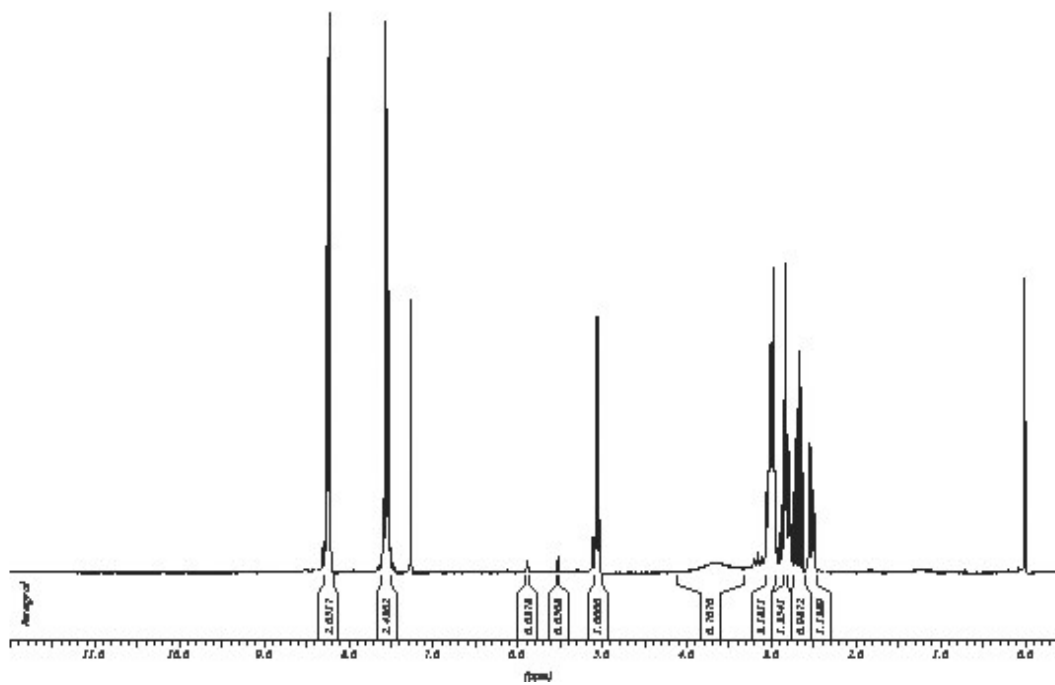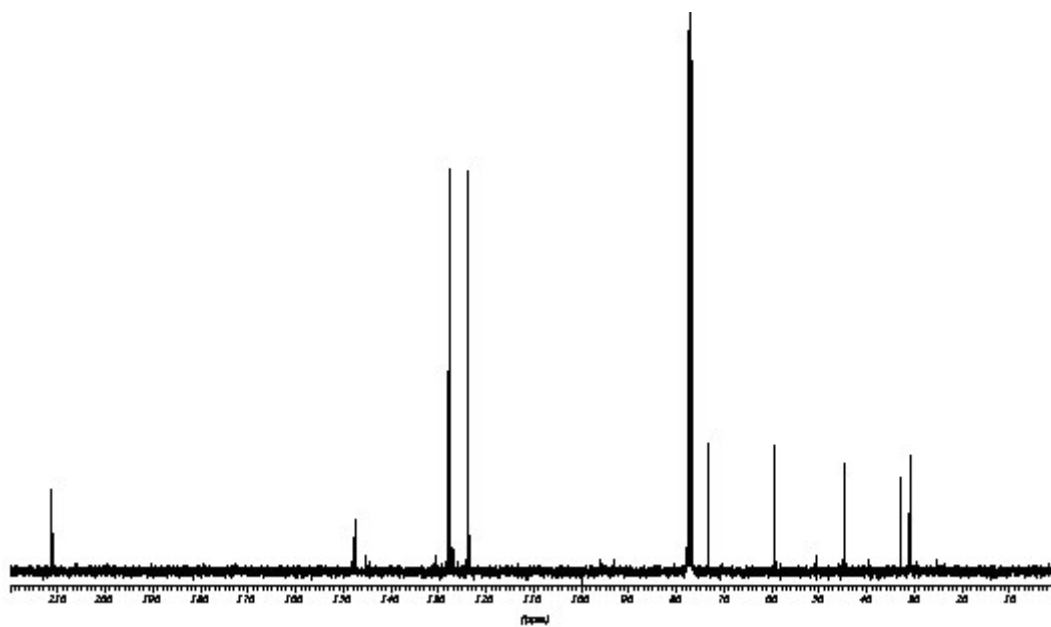

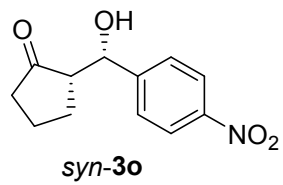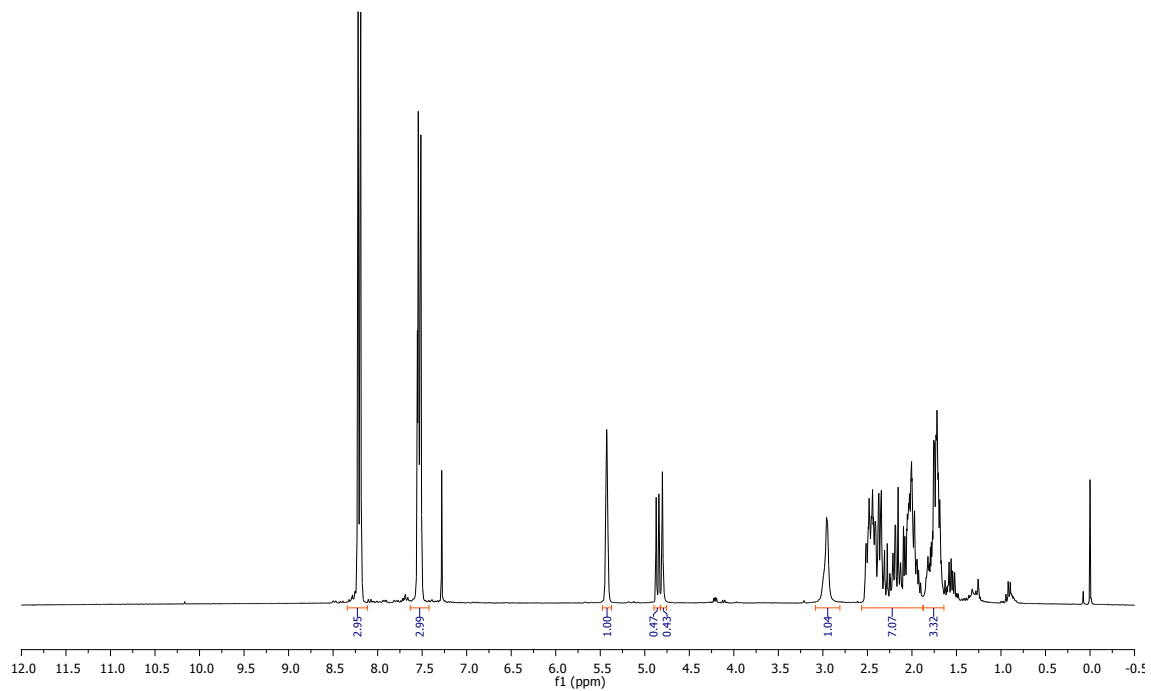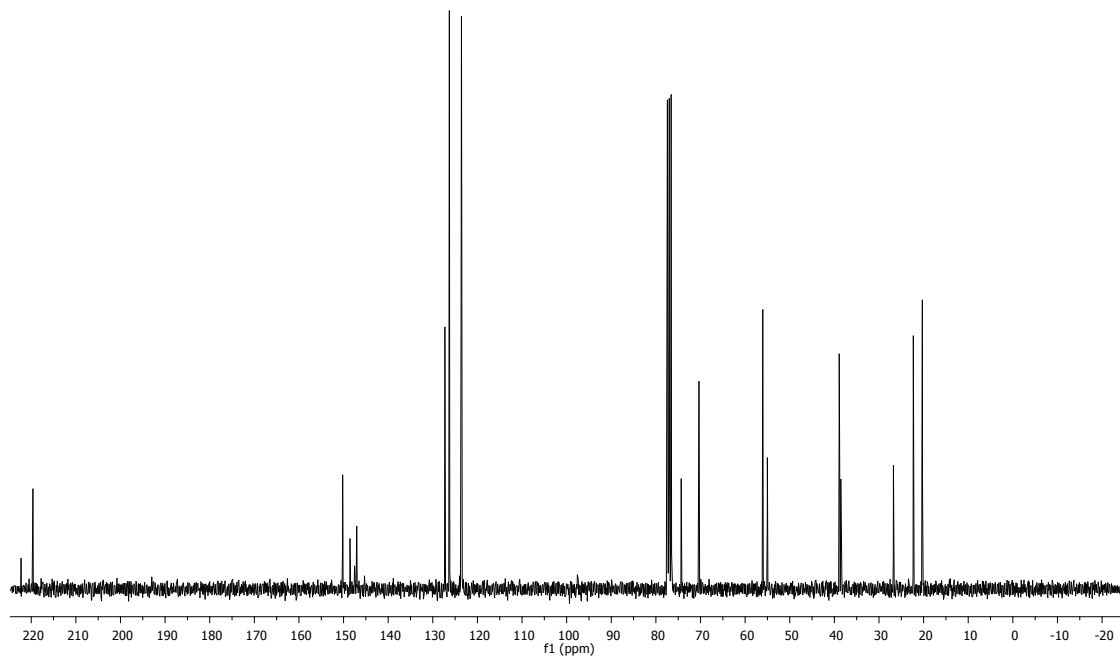



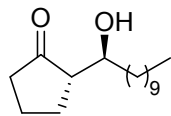

**anti-3p**

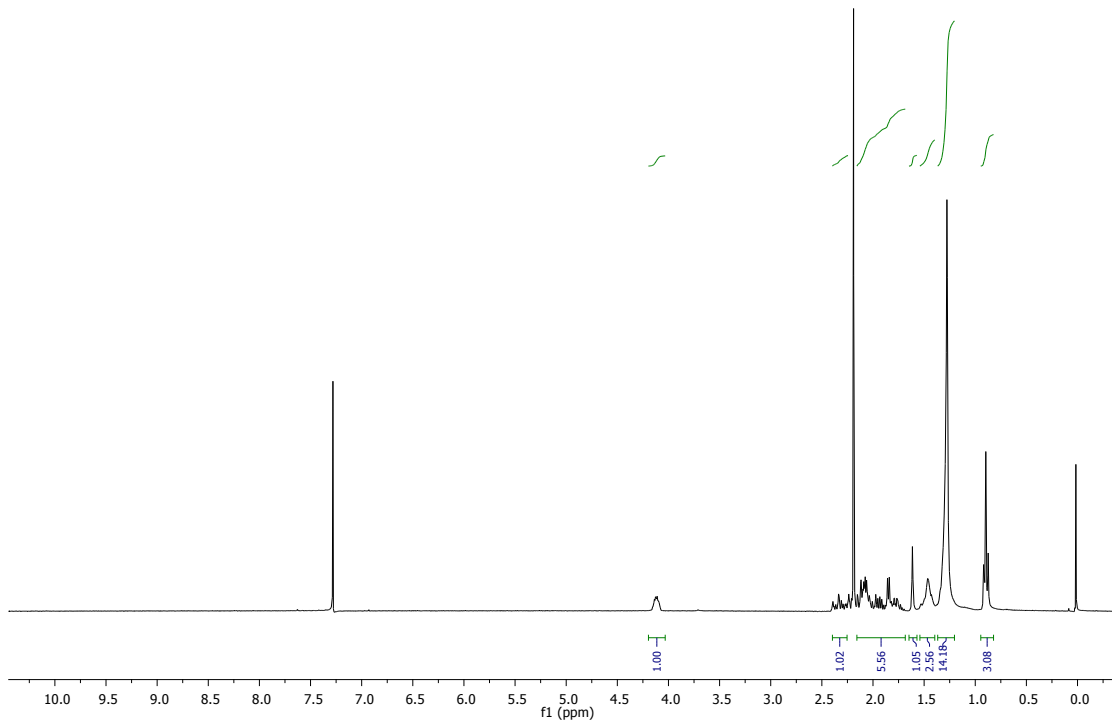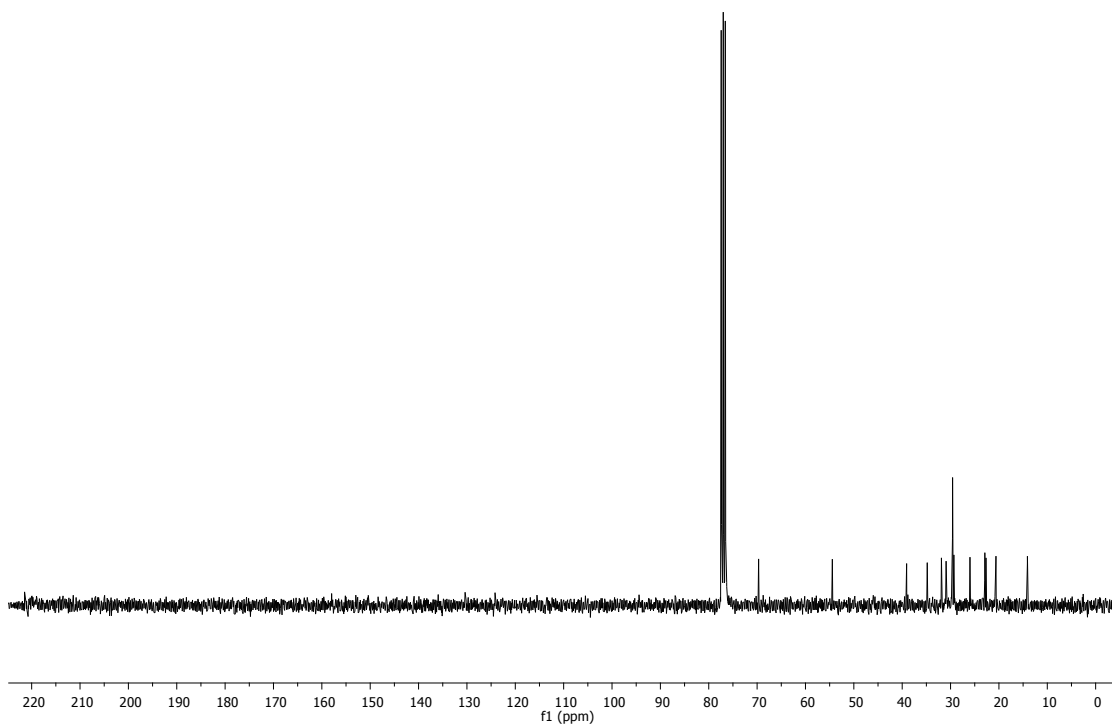

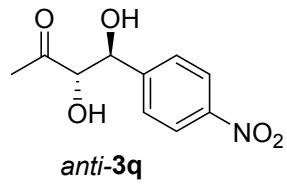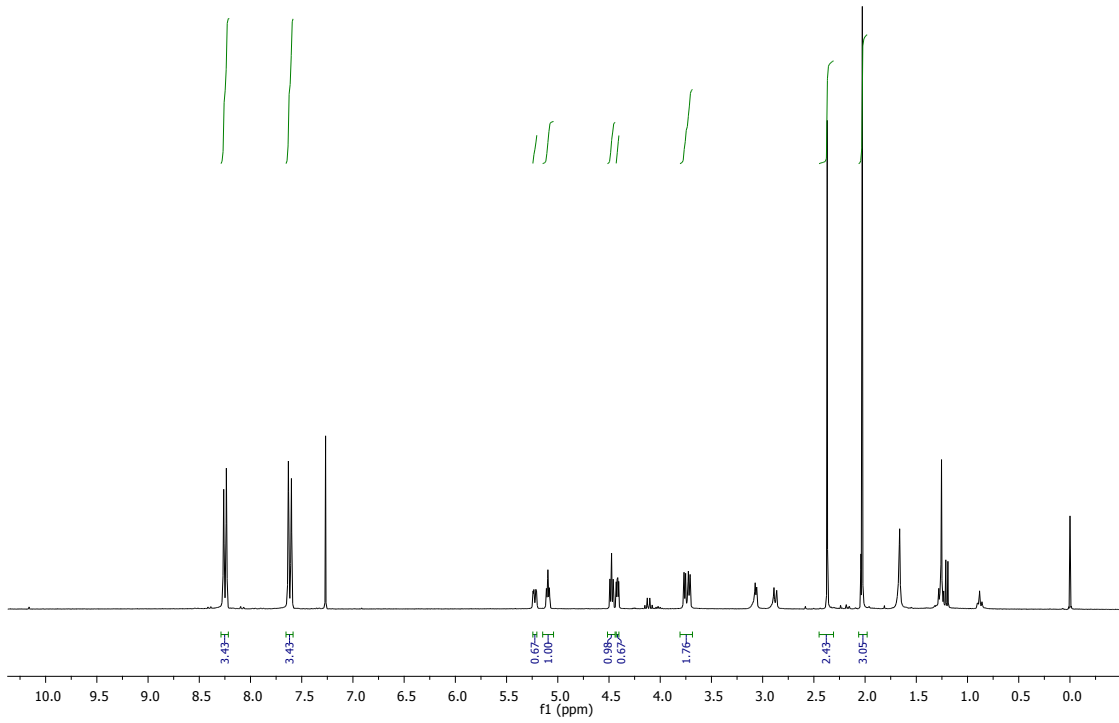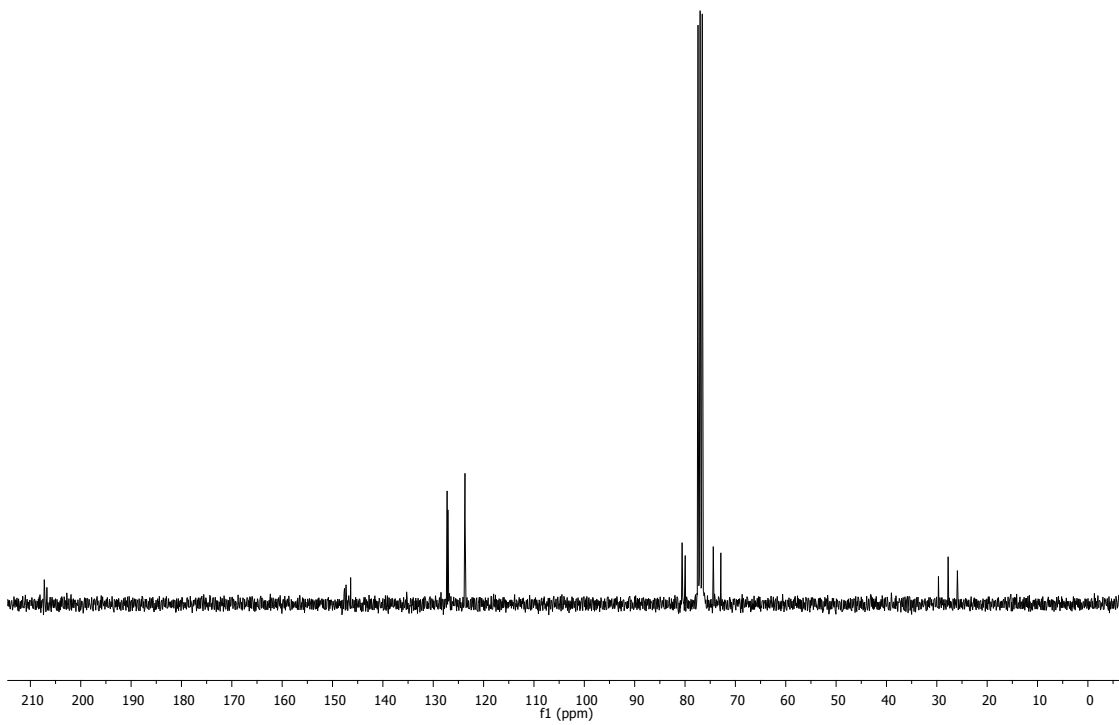

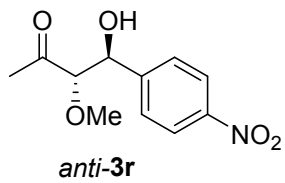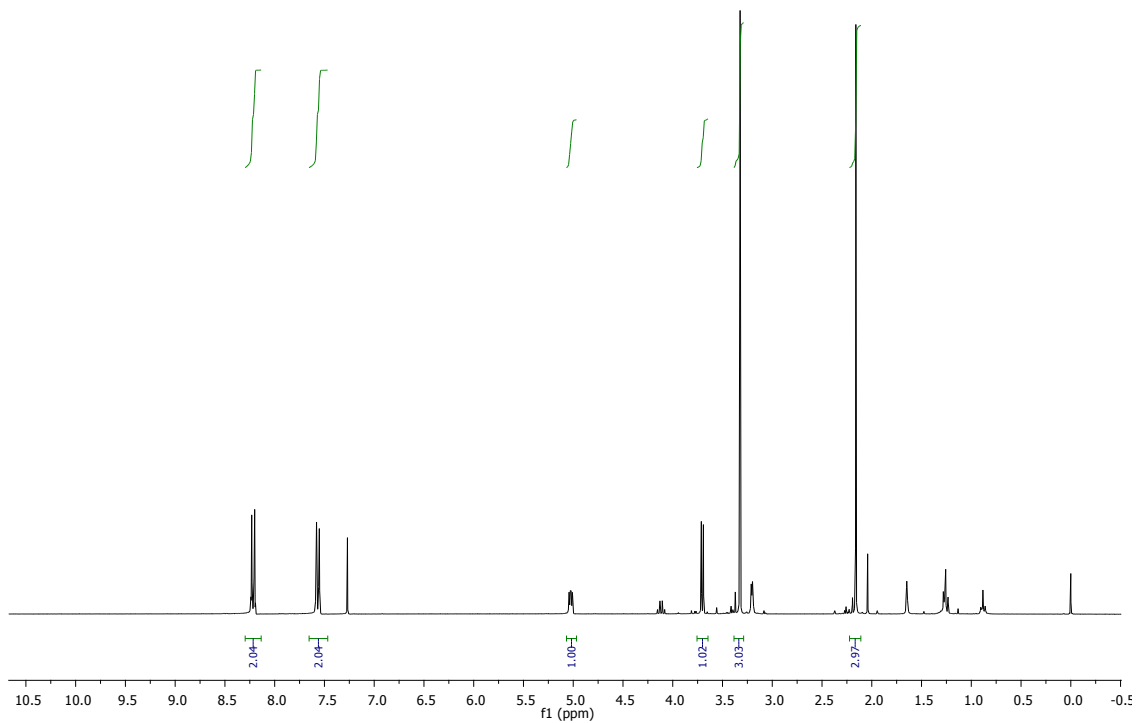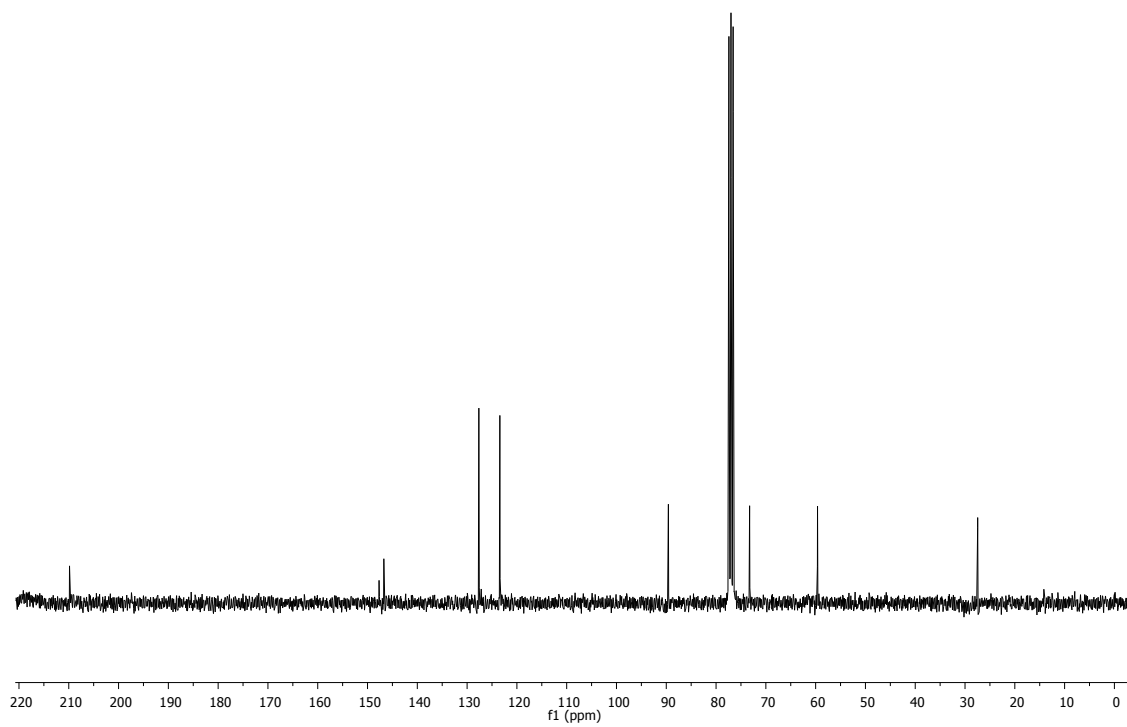

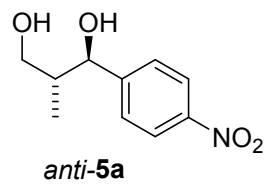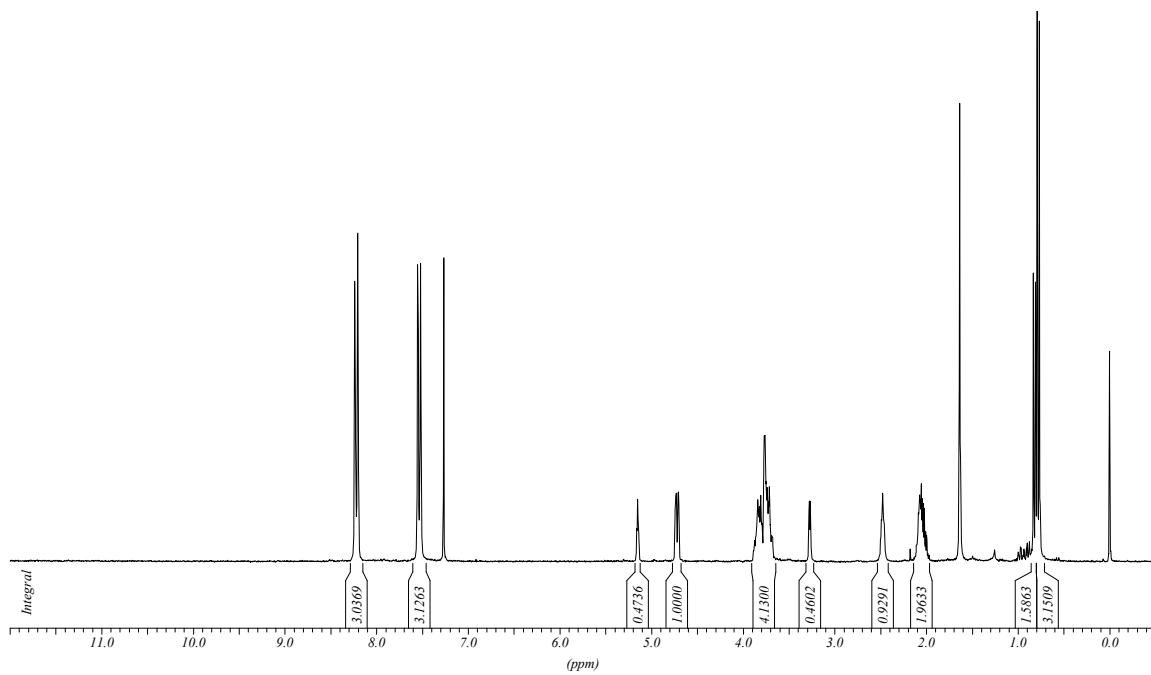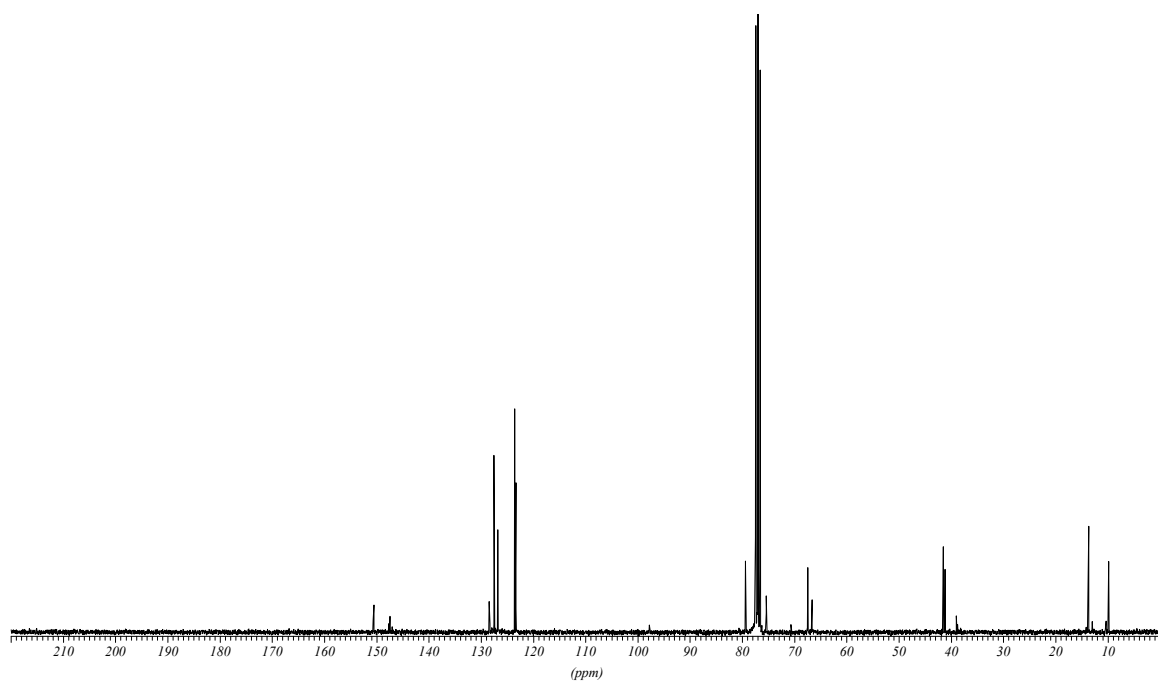

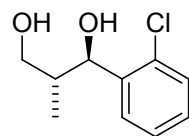

*anti-5b*

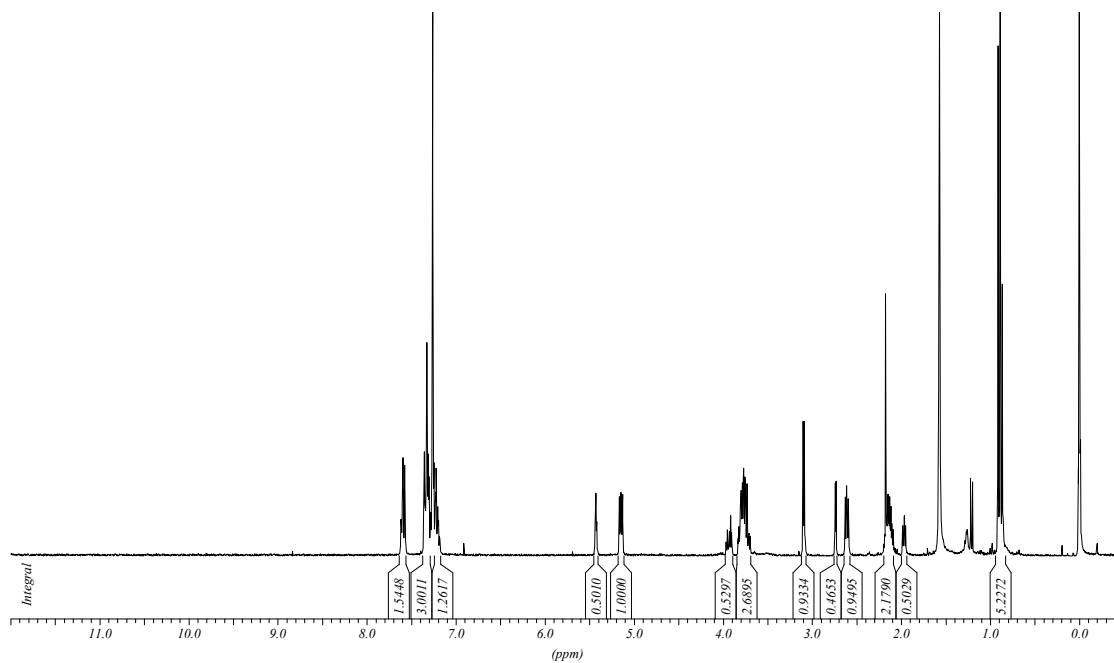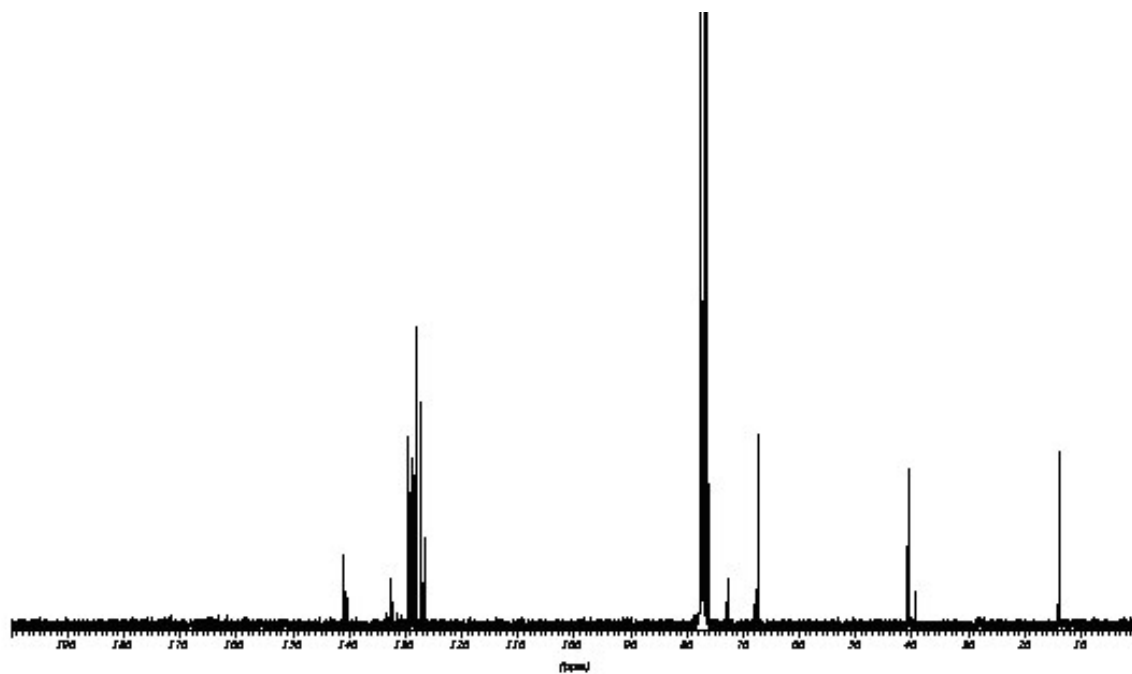

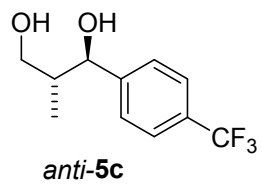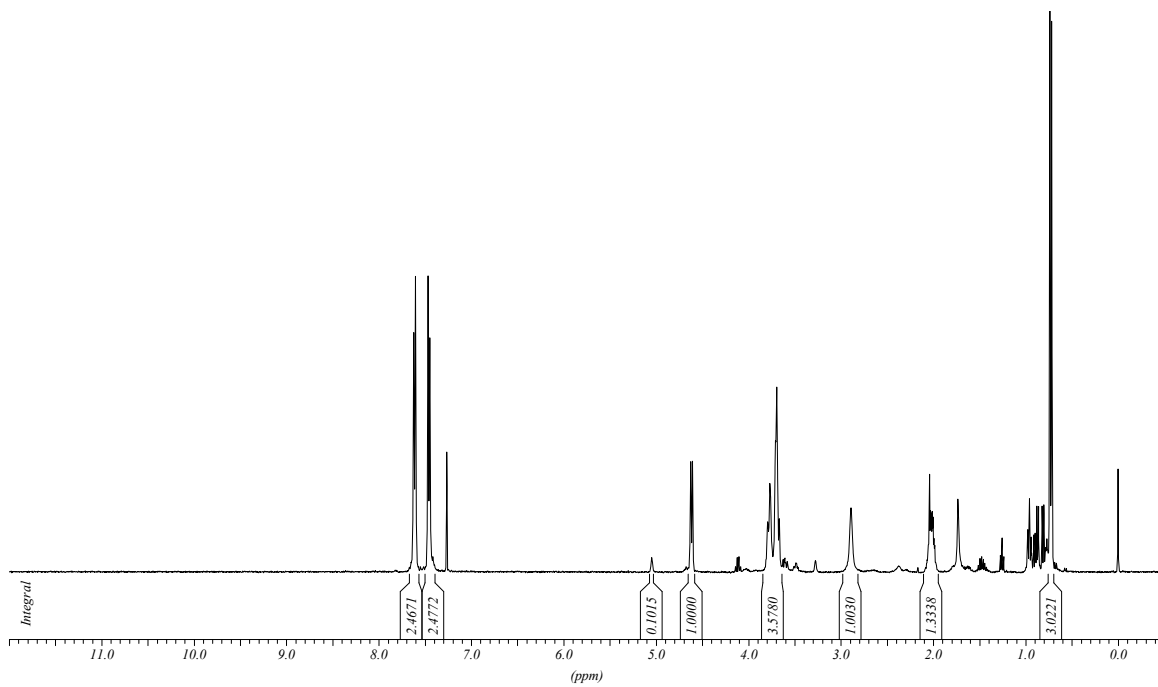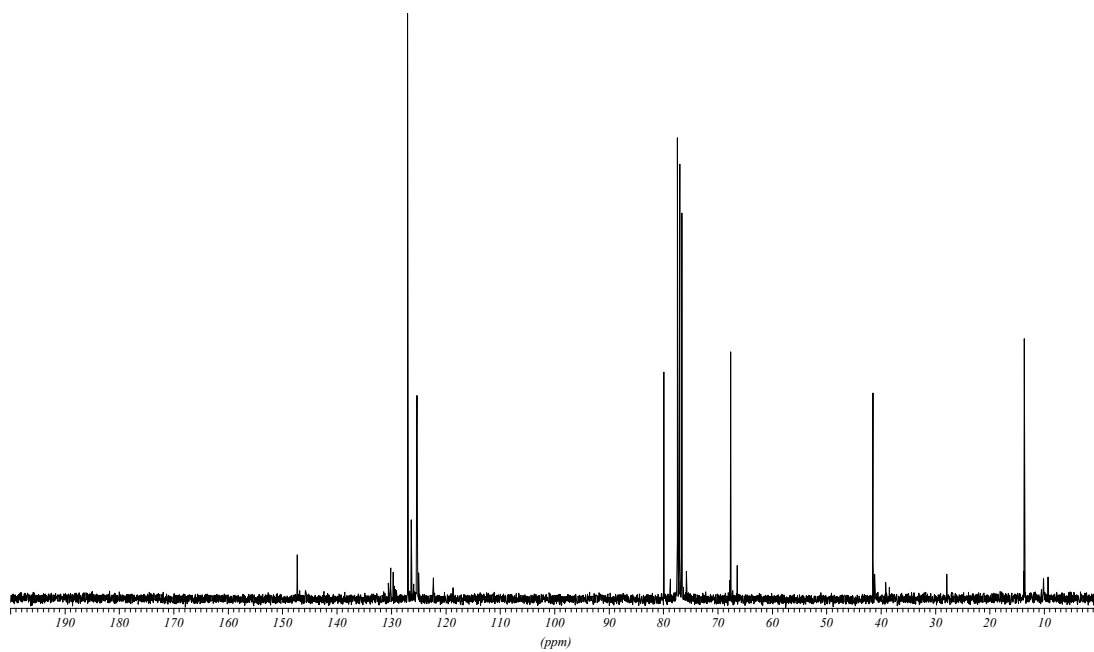

# HPLC for aldol products

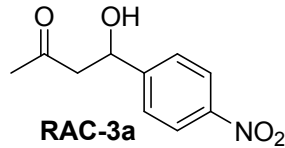

AS, 85:15, 1ML

```

=====
Injection Date   : 29/04/2015 20:34:44           Seq. Line :    1
Sample Name     : RG1612                       Location  : Vial 11
Acq. Operator   : RG                           Inj       :    1
Acq. Instrument : HPLC-GPC                     Inj Volume: 8 µl
Acq. Method     : C:\HPCHEM\1\METHODS\RG.M
Last changed    : 29/04/2015 20:33:47 by RG
Analysis Method : C:\HPCHEM\1\METHODS\RG.M
Last changed    : 23/07/2015 18:37:52 by PZ
=====
  
```

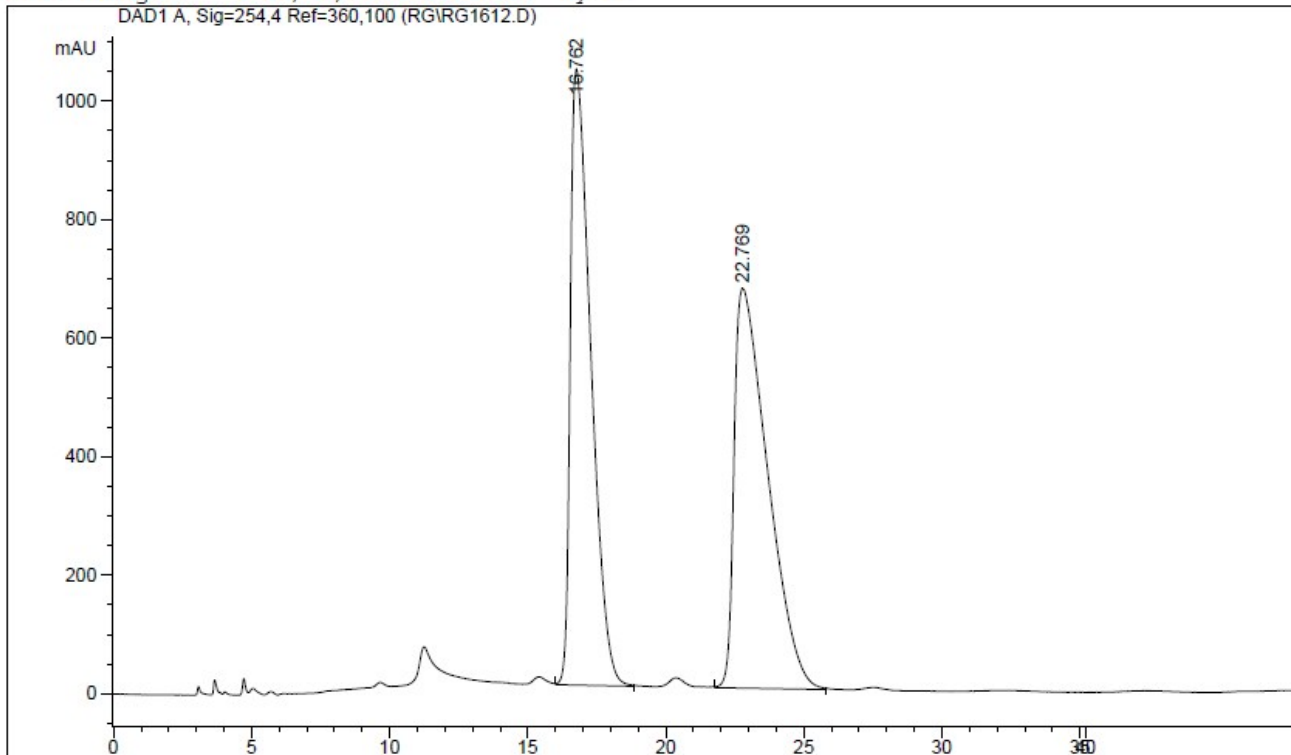

=====  
 Area Percent Report  
 =====

```

Sorted By      :      Signal
Multiplier     :      1.0000
Dilution       :      1.0000
Use Multiplier & Dilution Factor with ISTDs
  
```

Signal 1: DAD1 A, Sig=254,4 Ref=360,100

| Peak # | RetTime [min] | Type | Width [min] | Area [mAU*s] | Height [mAU] | Area %  |
|--------|---------------|------|-------------|--------------|--------------|---------|
| 1      | 16.762        | VV   | 0.6946      | 5.35379e4    | 1040.03723   | 48.4599 |
| 2      | 22.769        | BB   | 0.9978      | 5.69409e4    | 675.26349    | 51.5401 |

Totals : 1 1047005 1715 20072

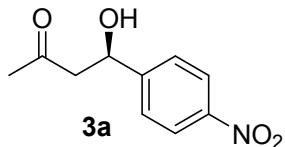

AS, 85:15 (Hx:iPrOH), 1.0 mL/min, HPLC2

```

=====
Injection Date   : 30/03/2015 10:35:13          Seq. Line :    1
Sample Name     : RG1578C1                     Location  : Vial 11
Acq. Operator   : RG                           Inj       :    1
Acq. Instrument : HPLC 2                       Inj Volume: 7 µl
Acq. Method     : C:\HPCHEM\2\METHODS\C3_1_60.M
Last changed    : 30/03/2015 10:34:56 by RG
                  (modified after loading)
Analysis Method : C:\HPCHEM\2\METHODS\C4.M
Last changed    : 30/07/2015 14:54:31 by RG
  
```

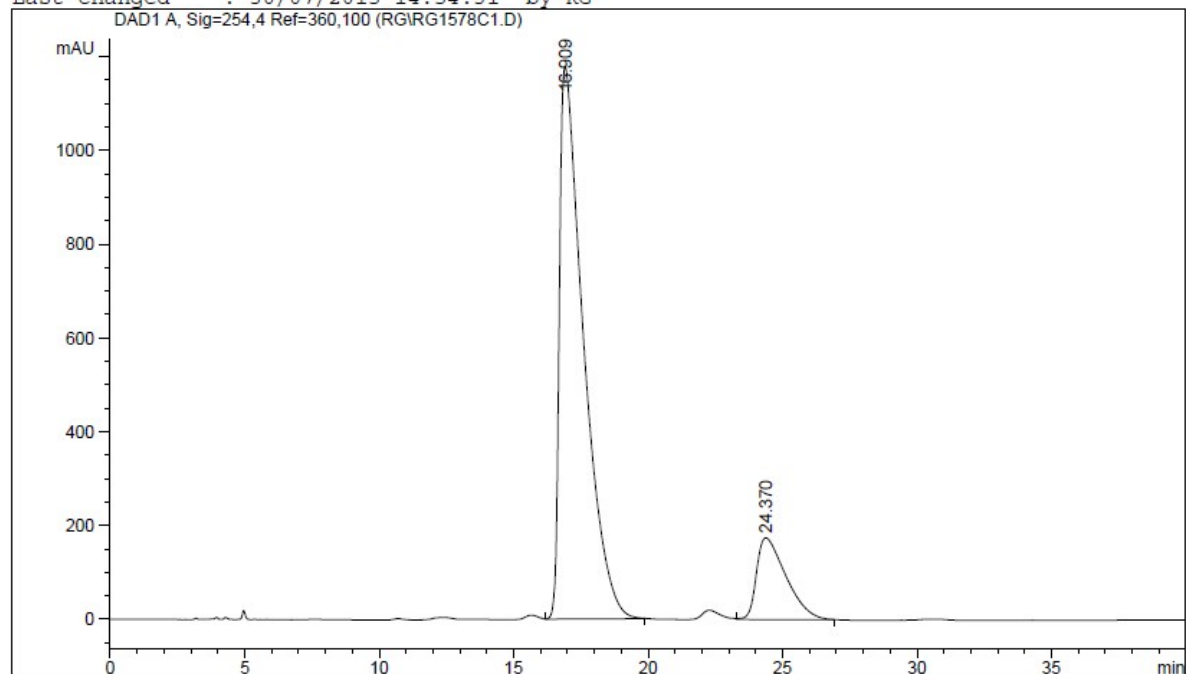

```

=====
                          Area Percent Report
=====
  
```

```

Sorted By      :      Signal
Multiplier     :      1.0000
Dilution      :      1.0000
Use Multiplier & Dilution Factor with ISTDs
  
```

Signal 1: DAD1 A, Sig=254,4 Ref=360,100

| Peak #   | RetTime [min] | Type | Width [min] | Area [mAU*s] | Height [mAU] | Area %  |
|----------|---------------|------|-------------|--------------|--------------|---------|
| 1        | 16.909        | VB   | 0.8582      | 7.29671e4    | 1178.66638   | 84.5605 |
| 2        | 24.370        | VB   | 1.0943      | 1.33227e4    | 174.59250    | 15.4395 |
| Totals : |               |      |             | 8.62899e4    | 1353.25888   |         |



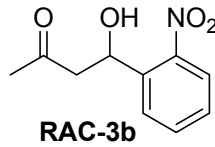

ADH (98:02) 1 ML/MIN

```

=====
Injection Date   : 29/01/2015 17:31:03
Sample Name      : RG1509RAC                      Location   : Vial 21
Acq. Operator    : RG
Acq. Instrument  : HPLC-GPC                      Inj Volume : 5 µl
Acq. Method      : C:\HPCHEM\1\METHODS\AO.M
Last changed     : 29/01/2015 18:10:46 by RG
                  (modified after loading)
Analysis Method  : C:\HPCHEM\1\METHODS\RG.M
Last changed     : 23/07/2015 18:37:52 by PZ
=====
  
```

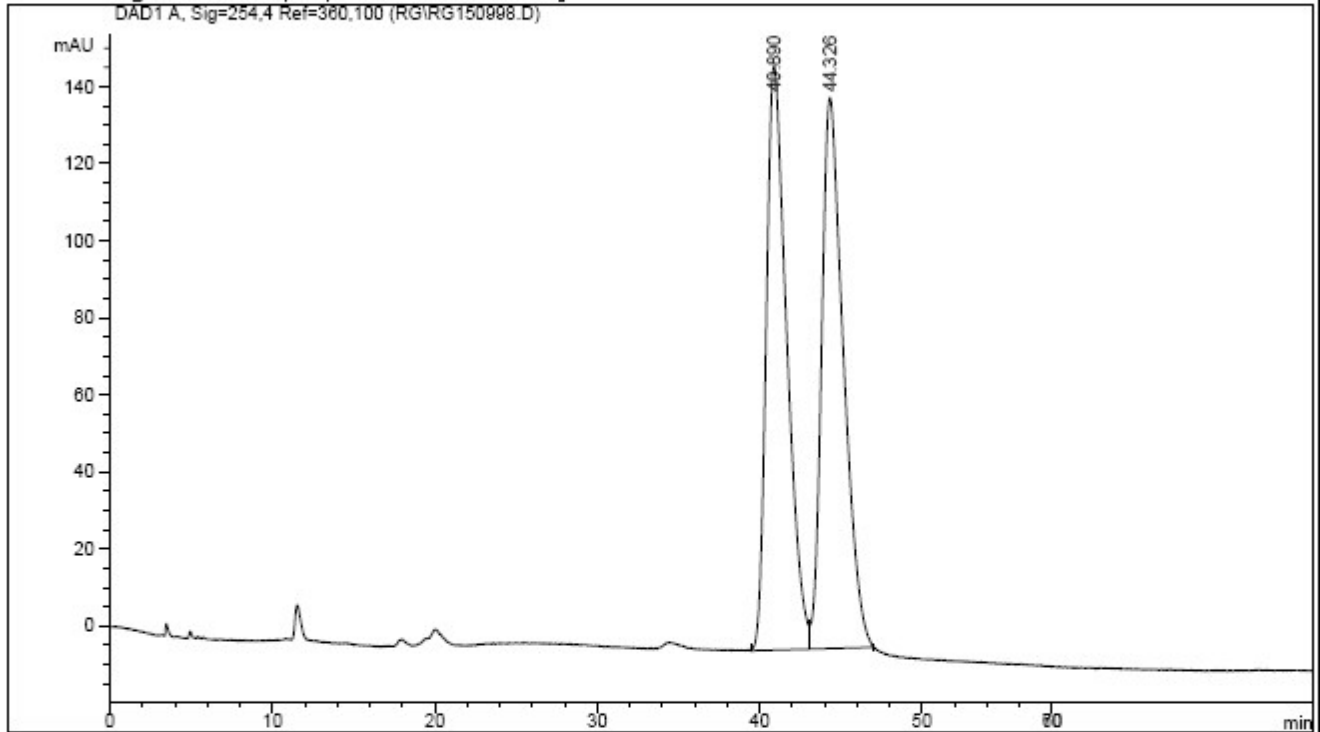

=====  
**Area Percent Report**  
 =====

```

Sorted By       :      Signal
Multiplier      :      1.0000
Dilution        :      1.0000
Use Multiplier & Dilution Factor with ISTDs
  
```

Signal 1: DAD1 A, Sig=254,4 Ref=360,100

| Peak # | RetTime [min] | Type | Width [min] | Area [mAU*s] | Height [mAU] | Area %  |
|--------|---------------|------|-------------|--------------|--------------|---------|
| 1      | 40.890        | VV   | 1.0455      | 1.33166e4    | 151.79311    | 49.9934 |
| 2      | 44.326        | VB   | 1.1344      | 1.33201e4    | 143.03912    | 50.0066 |

Totals :                                    2.66367e4    294.83223

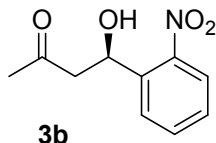

ADH (98:02) 1 ML/MIN

```

=====
Injection Date   : 29/01/2015 18:48:36
Sample Name     : RG1508
Acq. Operator   : RG
Acq. Instrument : HPLC-GPC
Acq. Method     : C:\HPCHEM\1\METHODS\AO.M
Last changed    : 29/01/2015 18:10:46 by RG
                  (modified after loading)
Analysis Method : C:\HPCHEM\1\METHODS\RG.M
Last changed    : 23/07/2015 18:37:52 by PZ
=====

```

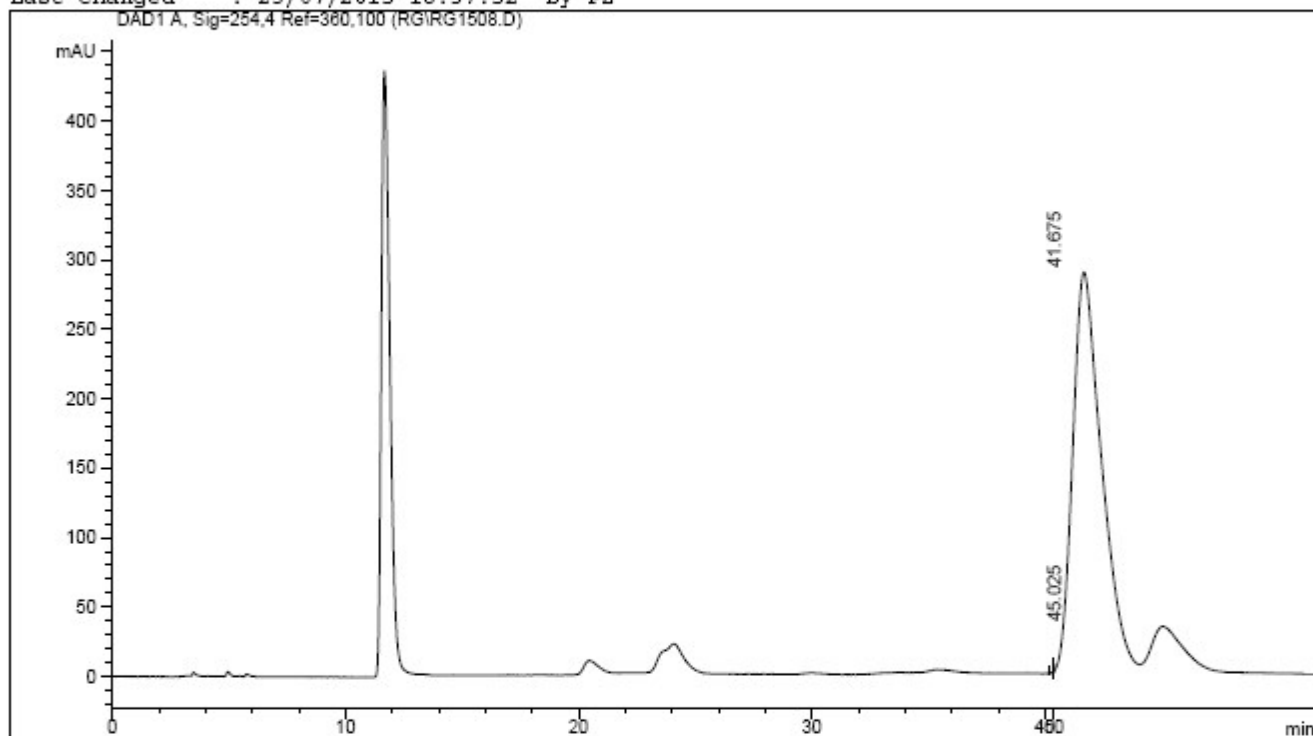

=====  
Area Percent Report  
=====

```

Sorted By      :      Signal
Multiplier     :      1.0000
Dilution       :      1.0000
Use Multiplier & Dilution Factor with ISTDs

```

Signal 1: DAD1 A, Sig=254,4 Ref=360,100

| Peak # | RetTime [min] | Type | Width [min] | Area [mAU*s] | Height [mAU] | Area %  |
|--------|---------------|------|-------------|--------------|--------------|---------|
| 1      | 41.675        | BB   | 1.1226      | 2.49185e4    | 288.80475    | 88.8940 |
| 2      | 45.025        | BB   | 1.1067      | 3113.22119   | 33.17999     | 11.1060 |

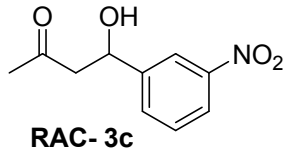

ADH, 95:5 (Hexano:IPA), 1 mL/min, GPC

```

=====
Injection Date   : 02/02/2015 13:51:09           Seq. Line   :    1
Sample Name     : RG1511R2                       Location    : Vial 1
Acq. Operator   : RG                             Inj         :    1
Acq. Instrument : HPLC-GPC                       Inj Volume  : 8 µl
Different Inj Volume from Sequence !   Actual Inj Volume : 5 µl
Acq. Method     : C:\HPCHEM\1\METHODS\AO.M
Last changed    : 02/02/2015 13:50:07 by RG
Analysis Method : C:\HPCHEM\1\METHODS\RG.M
Last changed    : 23/07/2015 18:37:52 by PZ
=====

```

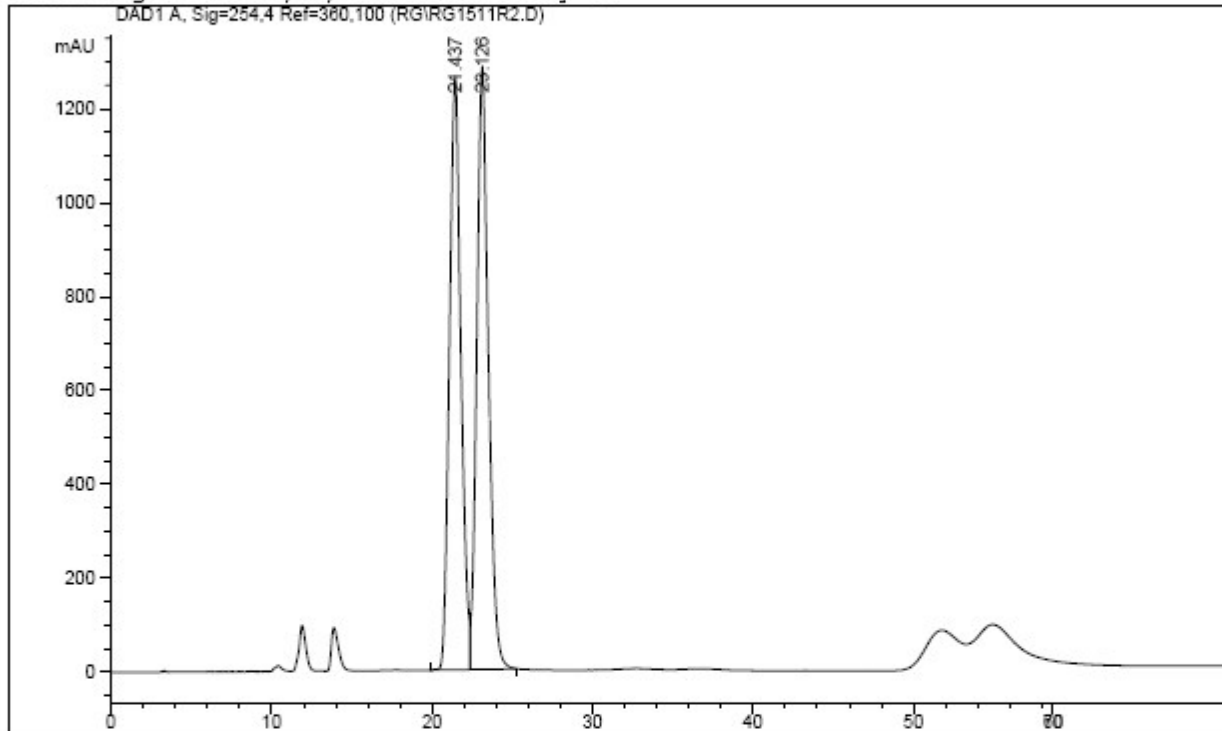

=====  
**Area Percent Report**  
=====

```

Sorted By       :      Signal
Multiplier      :      1.0000
Dilution        :      1.0000
Use Multiplier & Dilution Factor with ISTDs

```

Signal 1: DAD1 A, Sig=254,4 Ref=360,100

| Peak # | RetTime [min] | Type | Width [min] | Area [mAU*s] | Height [mAU] | Area %  |
|--------|---------------|------|-------------|--------------|--------------|---------|
| 1      | 21.437        | PV   | 0.7369      | 6.24765e4    | 1263.40625   | 49.2414 |
| 2      | 23.126        | VB   | 0.6448      | 6.44013e4    | 1284.89001   | 50.7586 |

Totals :                                    1.26878e5    2548.29626

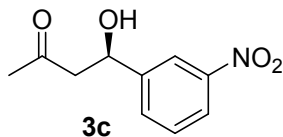

ADH, 95:5 (Hx:iPrOH), 1 mL/min, GPC

```

=====
Injection Date   : 02/02/2015 16:15:32
Sample Name      : RG1510BIS
Location         : Vial 2
Acq. Operator    : RG
Acq. Instrument  : HPLC-GPC
Acq. Method      : C:\HPCHEM\1\METHODS\A0.M
Last changed     : 02/02/2015 16:16:26 by RG
                  (modified after loading)
Analysis Method  : C:\HPCHEM\1\METHODS\RG.M
Last changed     : 23/07/2015 18:37:52 by PZ
=====
  
```

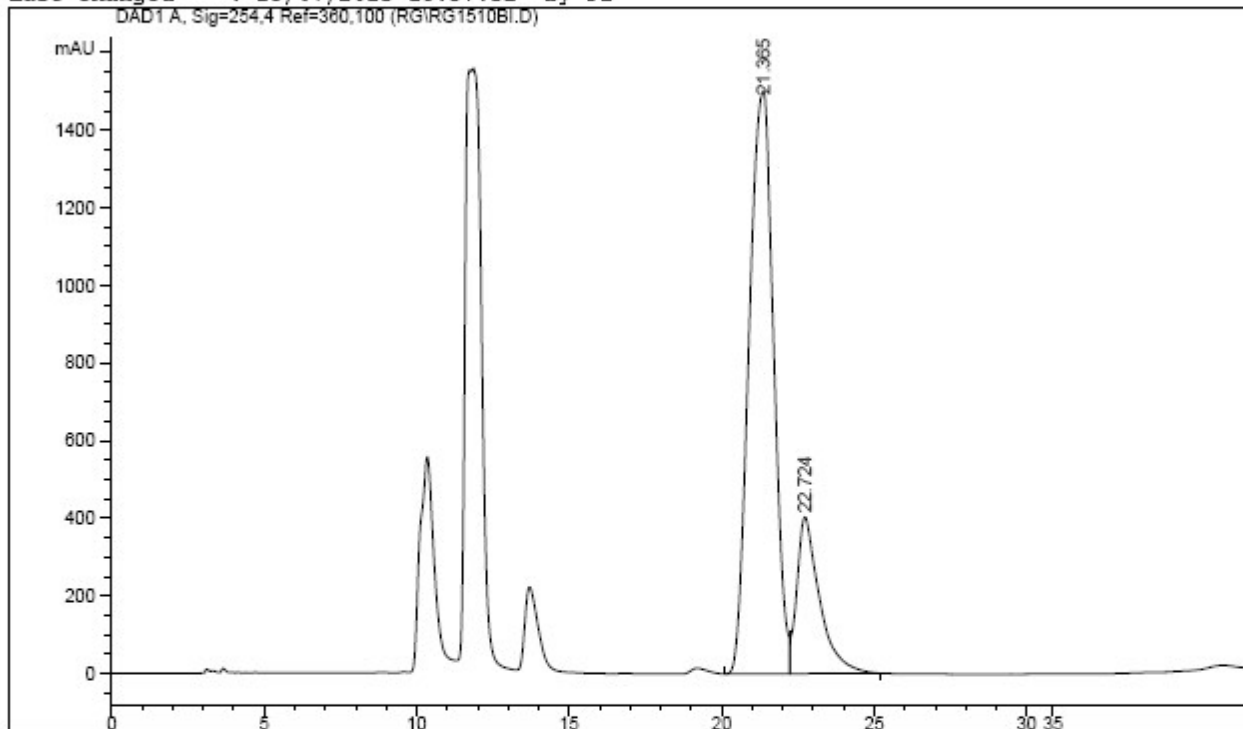

=====  
 Area Percent Report  
 =====

```

Sorted By      :      Signal
Multiplier     :      1.0000
Dilution       :      1.0000
Use Multiplier & Dilution Factor with ISTDs
  
```

Signal 1: DAD1 A, Sig=254,4 Ref=360,100

| Peak # | RetTime [min] | Type | Width [min] | Area [mAU*s] | Height [mAU] | Area %  |
|--------|---------------|------|-------------|--------------|--------------|---------|
| 1      | 21.365        | VV   | 0.7080      | 8.34426e4    | 1502.34717   | 79.9436 |
| 2      | 22.724        | VB   | 0.7256      | 2.09342e4    | 403.30258    | 20.0564 |

Totals :                    1.04377e5   1905.64975

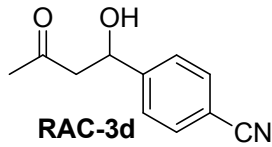

ODH1 95/05 1 ml/min HPLC2

```

=====
Injection Date   : 15/09/2015 10:22:53
Sample Name     : RG1513BI
Acq. Operator   : RG
Acq. Instrument : HPLC 2
Acq. Method     : C:\HPCHEM\2\METHODS\C1.M
Last changed    : 15/09/2015 10:10:31 by RG
                  (modified after loading)
Analysis Method : C:\HPCHEM\2\METHODS\C1.M
Last changed    : 14/09/2015 16:24:05 by JW
=====

```

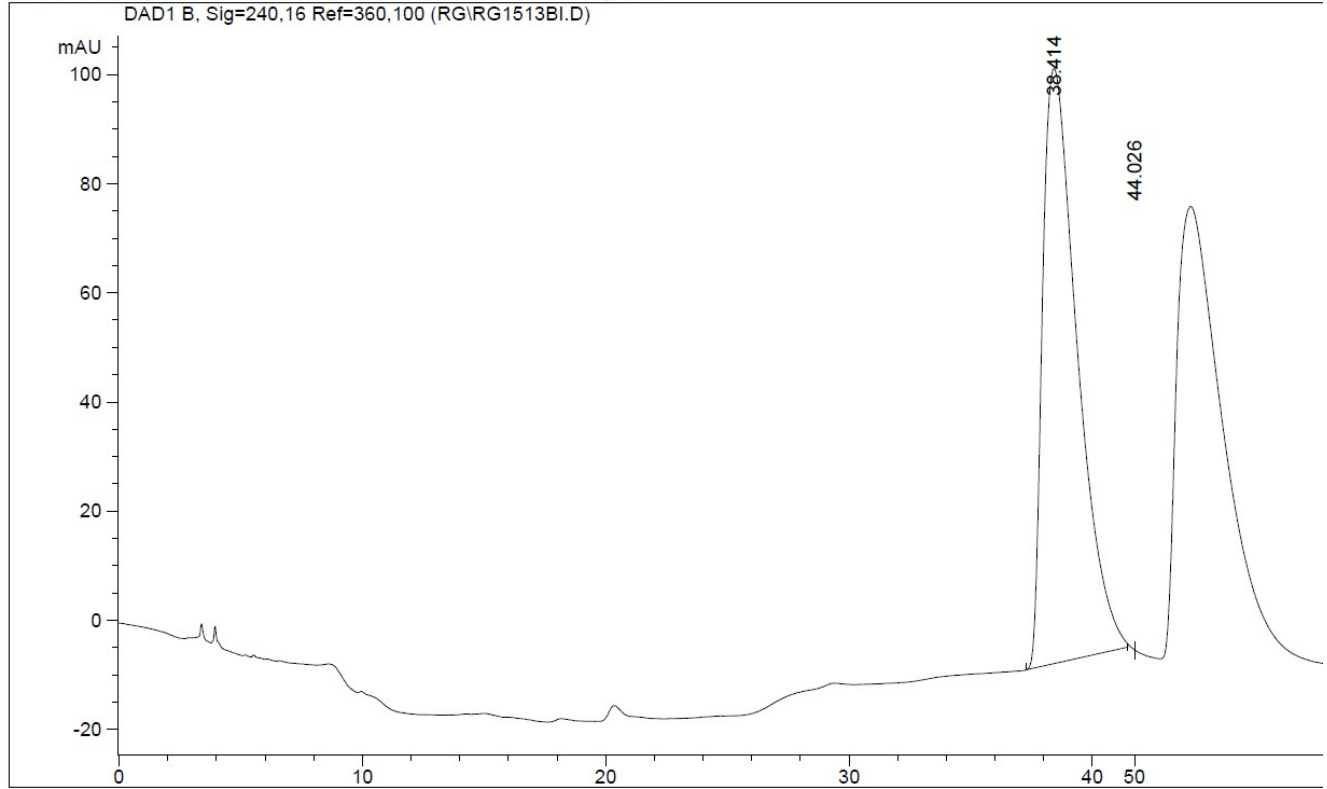

=====  
Area Percent Report  
=====

```

Sorted By      :      Signal
Multiplier    :      1.0000
Dilution      :      1.0000
Sample Amount  :      1.00000 [ng/ul] (not used in calc.)
Use Multiplier & Dilution Factor with ISTDs

```

Signal 1: DAD1 B, Sig=240,16 Ref=360,100

| Peak # | RetTime [min] | Type | Width [min] | Area [mAU*s] | Height [mAU] | Area %  |
|--------|---------------|------|-------------|--------------|--------------|---------|
| 1      | 38.414        | PB   | 1.4302      | 1.08117e4    | 109.09745    | 50.9591 |
| 2      | 44.026        | PB   | 1.5452      | 1.04047e4    | 82.28828     | 49.0409 |

Totals :                      2.12164e4    191.38573

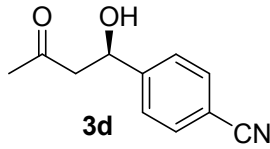

ODH1 95/05 1 ml/min HPLC2

```

=====
Injection Date   : 15/09/2015 11:18:15
Sample Name     : RG1781BI                      Location  : Vial 32
Acq. Operator   : RG
Acq. Instrument : HPLC 2                       Inj Volume: 5 µl
Acq. Method     : C:\HPCHEM\2\METHODS\C1.M
Last changed    : 15/09/2015 10:10:31 by RG
                  (modified after loading)
Analysis Method : C:\HPCHEM\2\METHODS\C1.M
Last changed    : 14/09/2015 16:24:05 by JW
  
```

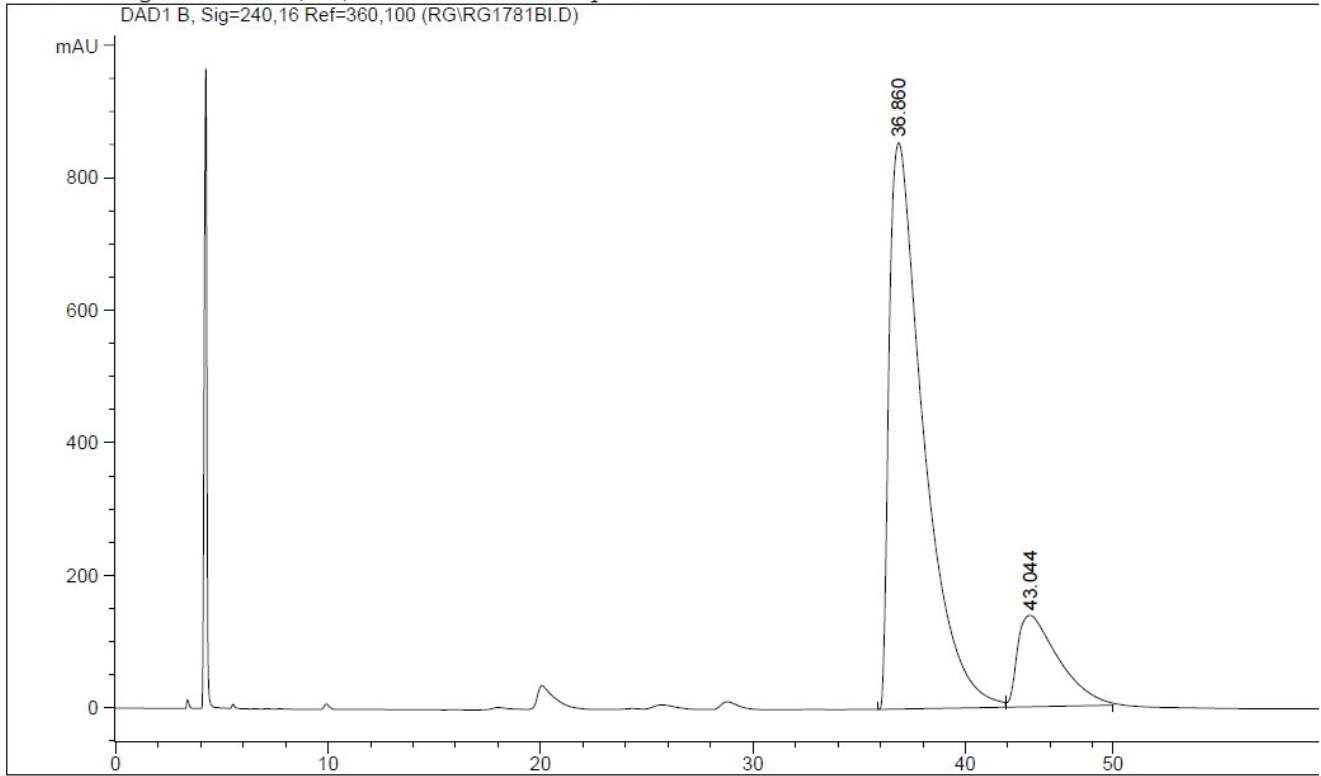

=====  
 Area Percent Report  
 =====

```

Sorted By       : Signal
Multiplier      : 1.0000
Dilution       : 1.0000
Sample Amount   : 1.00000 [ng/ul] (not used in calc.)
Use Multiplier & Dilution Factor with ISTDs
  
```

Signal 1: DAD1 B, Sig=240,16 Ref=360,100

| Peak # | RetTime [min] | Type | Width [min] | Area [mAU*s] | Height [mAU] | Area %  |
|--------|---------------|------|-------------|--------------|--------------|---------|
| 1      | 36.860        | PB   | 1.5239      | 9.61367e4    | 854.92126    | 83.7728 |
| 2      | 43.044        | BB   | 1.8415      | 1.86222e4    | 138.07594    | 16.2272 |

Totals :                                    1.14759e5    992.99721

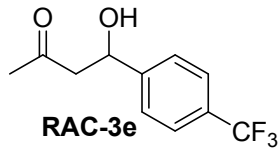

AS, 92:08 (Hx:iPrOH), 1 mL/min, GPC

```

=====
Injection Date   : 06/02/2015 17:30:47
Sample Name      : RG151592
Acq. Operator    : RG
Acq. Instrument  : HPLC-GPC
Acq. Method      : C:\HPCHEM\1\METHODS\RG.M
Last changed     : 06/02/2015 17:08:29 by RG
                  (modified after loading)
Analysis Method  : C:\HPCHEM\1\METHODS\RG.M
Last changed     : 23/07/2015 18:37:52 by PZ
DAD1 D, Sig=230,16 Ref=360,100 (RG\RG151592.D)
=====

```

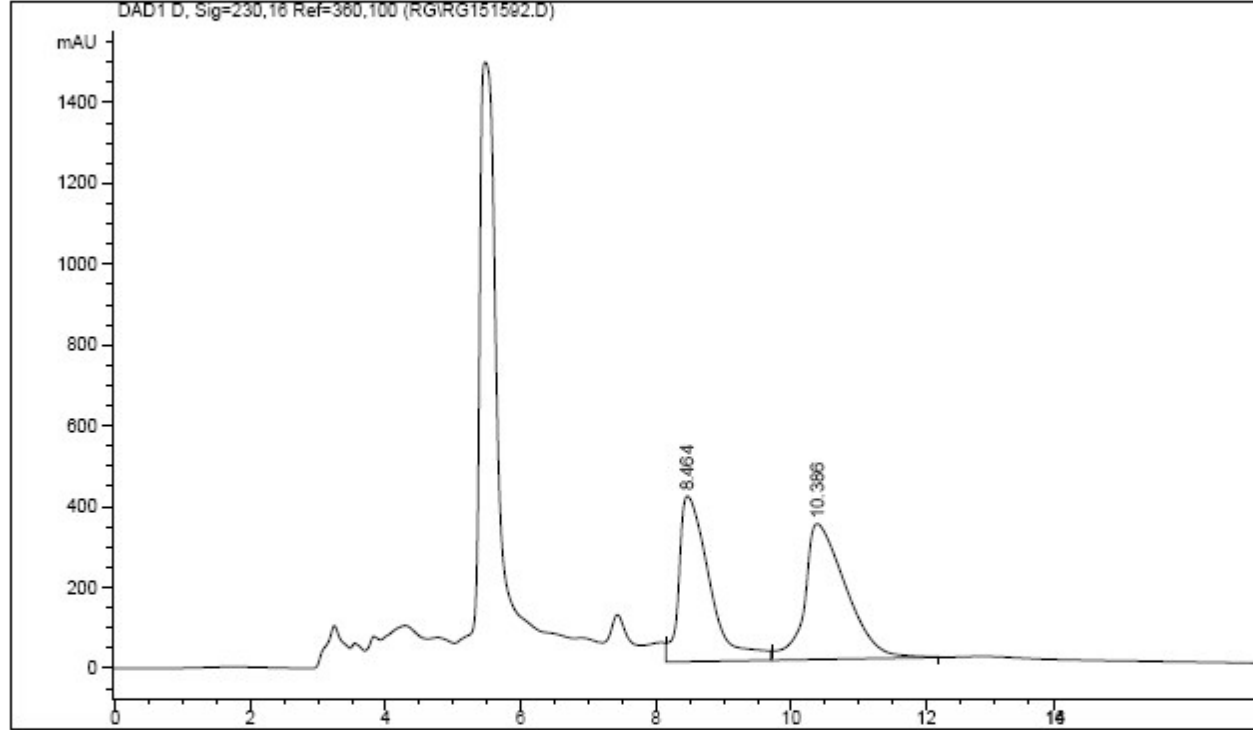

```

=====
                          Area Percent Report
=====

```

```

Sorted By      : Signal
Multiplier     : 1.0000
Dilution      : 1.0000
Use Multiplier & Dilution Factor with ISTDs

```

Signal 1: DAD1 D, Sig=230,16 Ref=360,100

| Peak # | RetTime [min] | Type | Width [min] | Area [mAU*s] | Height [mAU] | Area %  |
|--------|---------------|------|-------------|--------------|--------------|---------|
| 1      | 8.464         | VV   | 0.4901      | 1.28705e4    | 410.17987    | 47.3647 |
| 2      | 10.386        | VB   | 0.5589      | 1.43026e4    | 335.82611    | 52.6353 |

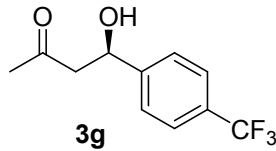

AS, 92:08 (Hx:iPrOH), 1 mL/min, GPC

```

=====
Injection Date   : 06/02/2015 17:52:42
Sample Name     : RG151492
Acq. Operator   : RG
Acq. Instrument : HPLC-GPC
Acq. Method     : C:\HPCHEM\1\METHODS\RG.M
Last changed    : 06/02/2015 17:08:29 by RG
                  (modified after loading)
Analysis Method : C:\HPCHEM\1\METHODS\RG.M
Last changed    : 23/07/2015 18:37:52 by PZ
=====
  
```

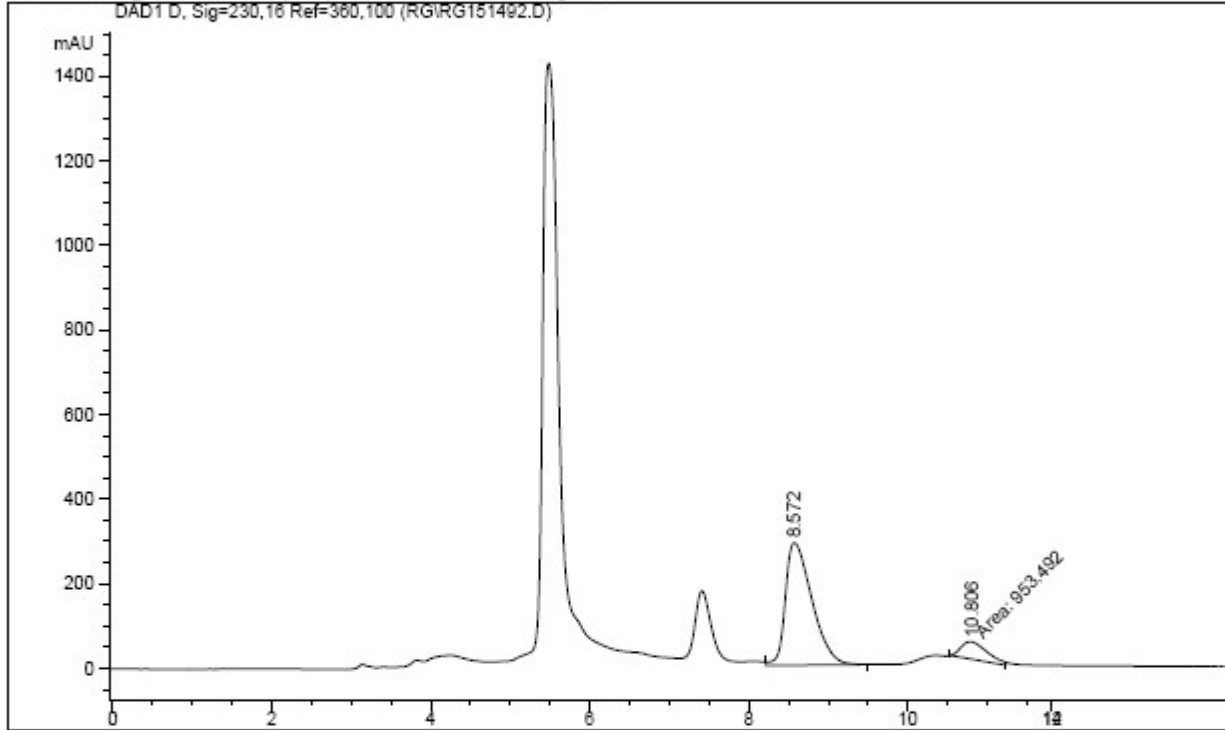

=====  
 Area Percent Report  
 =====

```

Sorted By       :      Signal
Multiplier      :      1.0000
Dilution        :      1.0000
Use Multiplier & Dilution Factor with ISTDs
  
```

Signal 1: DAD1 D, Sig=230,16 Ref=360,100

| Peak # | RetTime [min] | Type | Width [min] | Area [mAU*s] | Height [mAU] | Area %  |
|--------|---------------|------|-------------|--------------|--------------|---------|
| 1      | 8.572         | VB   | 0.3595      | 6739.86865   | 289.59125    | 87.6063 |
| 2      | 10.806        | MM   | 0.3857      | 953.49225    | 41.20644     | 12.3937 |

Totals :                                    7693.36090    330.79769



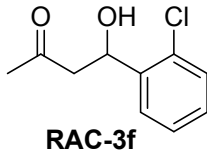

AS, 98:02 (Hx:iPrOH), 1 mL/min, GPC

```

=====
Injection Date   : 09/02/2015 16:27:59
Sample Name     : RG152798
Acq. Operator   : RG
Acq. Instrument : HPLC-GPC
Acq. Method     : C:\HPCHEM\1\METHODS\RG.M
Last changed    : 09/02/2015 16:25:03 by RG
                  (modified after loading)
Analysis Method : C:\HPCHEM\1\METHODS\RG.M
Last changed    : 23/07/2015 18:37:52 by PZ
=====
  
```

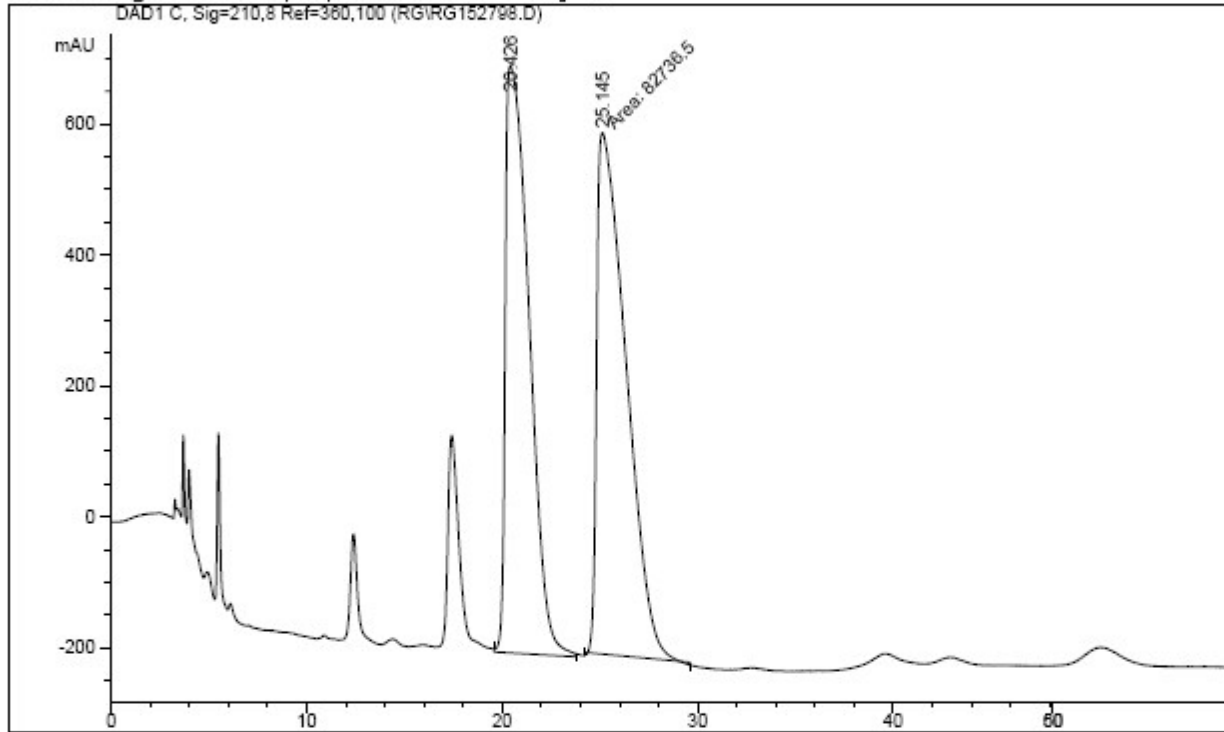

=====  
**Area Percent Report**  
 =====

```

Sorted By      :      Signal
Multiplier     :      1.0000
Dilution       :      1.0000
Use Multiplier & Dilution Factor with ISTDs
  
```

Signal 1: DAD1 C, Sig=210,8 Ref=360,100

| Peak # | RetTime [min] | Type | Width [min] | Area [mAU*s] | Height [mAU] | Area %  |
|--------|---------------|------|-------------|--------------|--------------|---------|
| 1      | 20.426        | BV   | 0.9955      | 7.57014e4    | 897.97900    | 47.7798 |
| 2      | 25.145        | MM   | 1.7307      | 8.27365e4    | 796.77527    | 52.2202 |

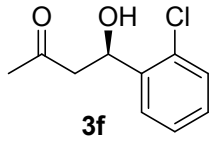

AS, 98:02 (Hx:iPrOH), 1 mL/min, GPC

```

=====
Injection Date   : 09/02/2015 17:31:34
Sample Name      : RG152598                      Location   : Vial 2
Acq. Operator   : RG
Acq. Instrument  : HPLC-GPC                      Inj Volume : 4 µl
Acq. Method     : C:\HPCHEM\1\METHODS\RG.M
Last changed    : 09/02/2015 16:25:03 by RG
                  (modified after loading)
Analysis Method : C:\HPCHEM\1\METHODS\RG.M
Last changed    : 23/07/2015 18:37:52 by PZ
DAD1 A, Sig=254,4 Ref=360,100 (RG1RG152598.D)
  
```

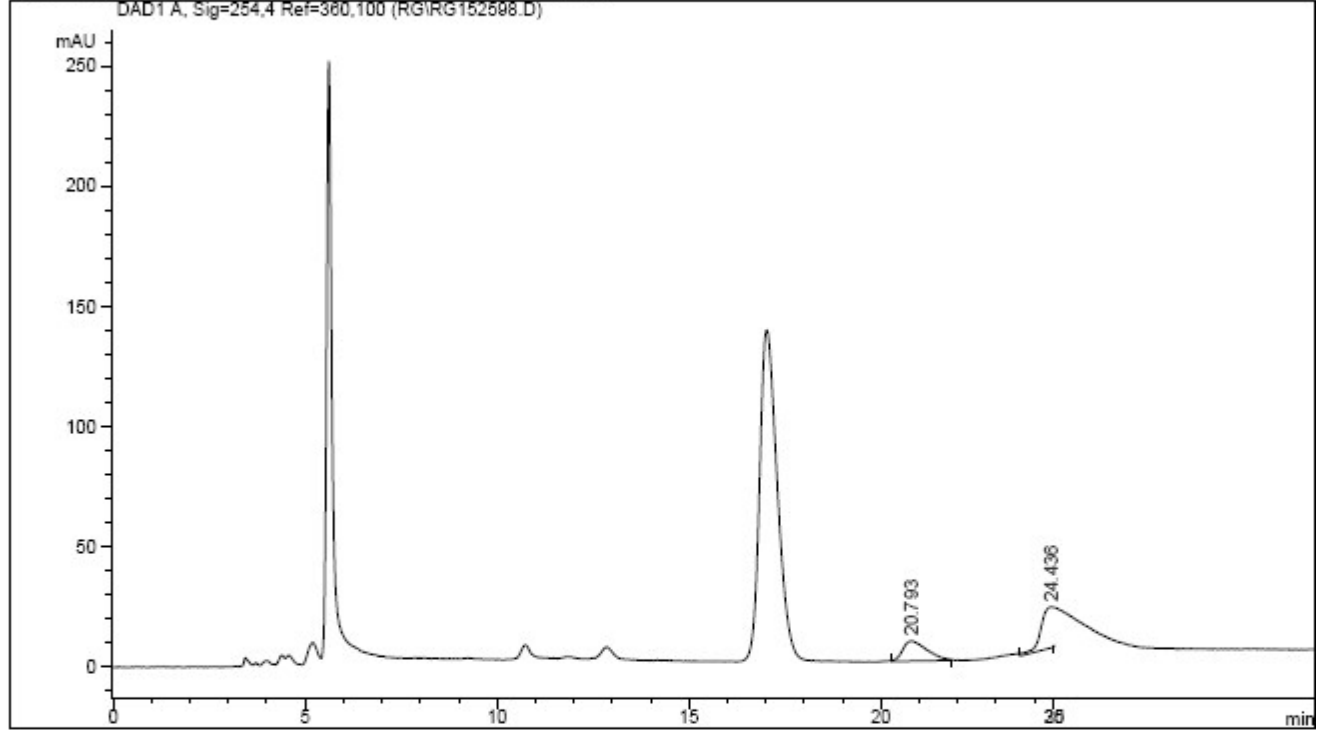

```

=====
                          Area Percent Report
=====
  
```

```

Sorted By      :      Signal
Multiplier     :      1.0000
Dilution       :      1.0000
Use Multiplier & Dilution Factor with ISTDs
  
```

Signal 1: DAD1 A, Sig=254,4 Ref=360,100

| Peak # | RetTime [min] | Type | Width [min] | Area [mAU*s] | Height [mAU] | Area %  |
|--------|---------------|------|-------------|--------------|--------------|---------|
| 1      | 20.793        | BB   | 0.5280      | 369.73752    | 8.39188      | 19.2121 |
| 2      | 24.436        | BB   | 0.9408      | 1554.76221   | 19.40345     | 80.7879 |

Totals :                                    1924.49973    27.79534

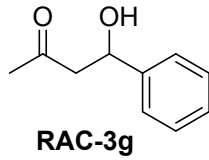

AS, 90:10, 1

```

=====
Injection Date   : 02/09/2015 14:04:14
Sample Name     : RG1532F                               Location : Vial 2
Acq. Operator  : RG
Acq. Instrument : HPLC 2                                Inj Volume : 4 µl
Acq. Method    : C:\HPCHEM\2\METHODS\C5.M
Last changed   : 02/09/2015 14:03:00 by RG
                (modified after loading)
Analysis Method : C:\HPCHEM\2\METHODS\C5.M
Last changed   : 21/04/2015 18:07:24 by JW
=====
  
```

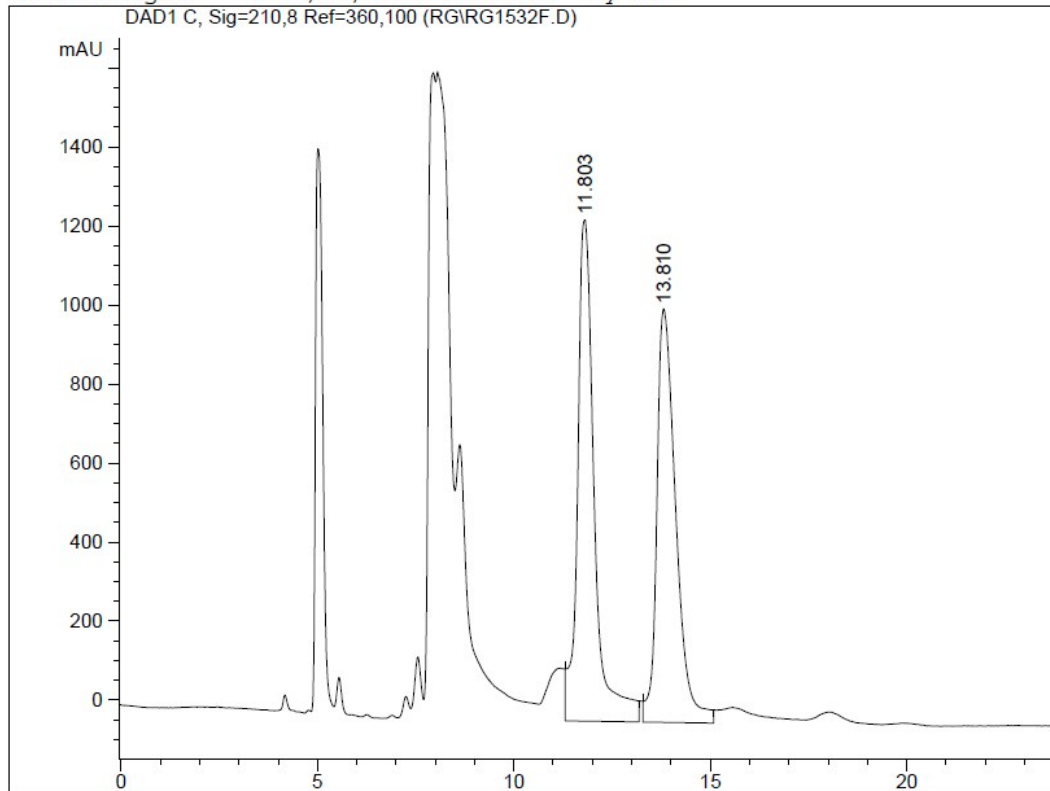

=====  
 Area Percent Report  
 =====

```

Sorted By      :      Signal
Multiplier     :      1.0000
Dilution      :      1.0000
Sample Amount  :      1.00000 [ng/ul]  (not used in calc.)
Use Multiplier & Dilution Factor with ISTDs
  
```

Signal 1: DAD1 C, Sig=210,8 Ref=360,100

| Peak # | RetTime [min] | Type | Width [min] | Area [mAU*s] | Height [mAU] | Area %  |
|--------|---------------|------|-------------|--------------|--------------|---------|
| 1      | 11.803        | VV   | 0.4351      | 3.77797e4    | 1269.69678   | 51.8064 |
| 2      | 13.810        | VB   | 0.4934      | 3.51451e4    | 1047.60461   | 48.1936 |

Totals :                                      7.29248e4    2317.30139

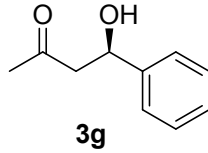

AS 90/10 HEX/IPA 1ml/min HPLC2

```

=====
Injection Date   : 11/02/2015 16:41:58
Sample Name     : RG1531                      Location  : Vial 41
Acq. Operator  : RG
Acq. Instrument : HPLC 2                      Inj Volume: 8 µl
Acq. Method    : C:\HPCHEM\2\METHODS\C6_1_60.M
Last changed   : 11/02/2015 16:29:08 by RG
                (modified after loading)
Analysis Method : C:\HPCHEM\1\METHODS\RG.M
Last changed   : 23/07/2015 18:37:52 by PZ
=====

```

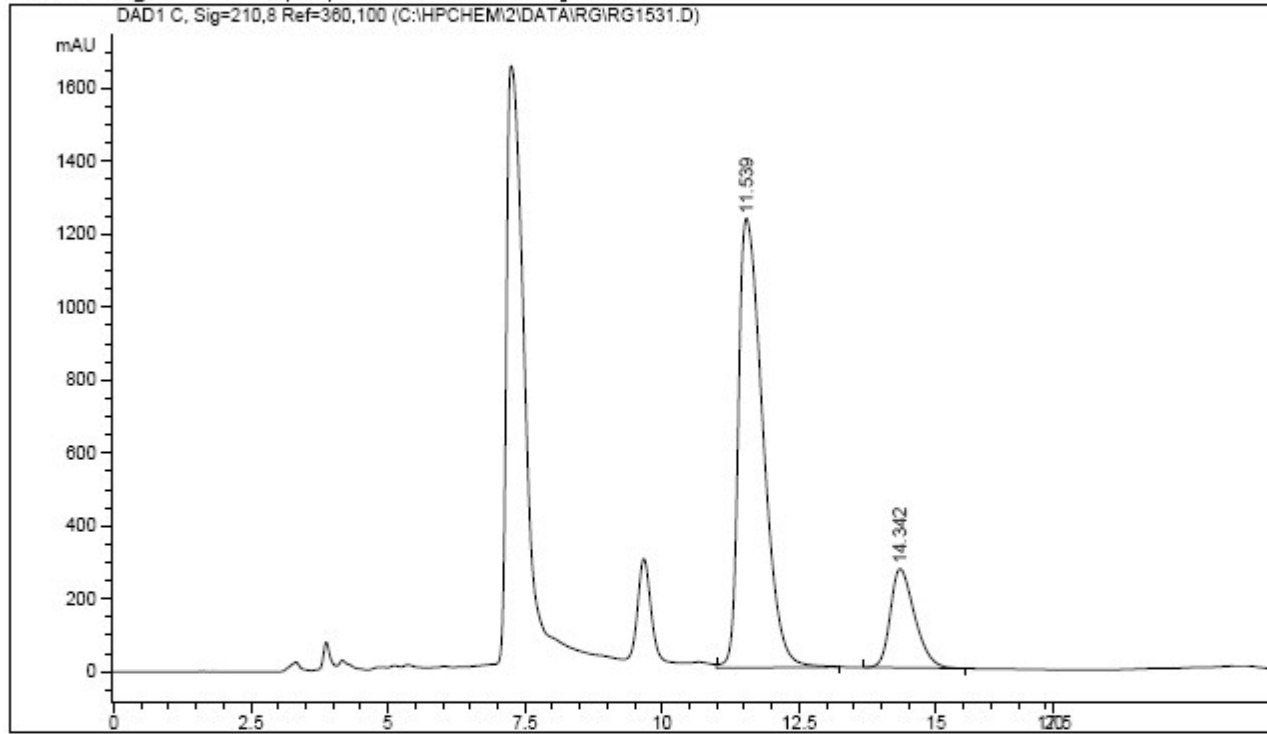

```

=====
                          Area Percent Report
=====

```

```

Sorted By      :      Signal
Multiplier    :      1.0000
Dilution      :      1.0000
Sample Amount  :      1.00000 [ng/ul]   (not used in calc.)
Use Multiplier & Dilution Factor with ISTDs

```

Signal 1: DAD1 C, Sig=210,8 Ref=360,100

| Peak # | RetTime [min] | Type | Width [min] | Area [mAU*s] | Height [mAU] | Area %  |
|--------|---------------|------|-------------|--------------|--------------|---------|
| 1      | 11.539        | VB   | 0.4608      | 3.81708e4    | 1234.12549   | 81.9351 |
| 2      | 14.342        | BV   | 0.4740      | 8415.80859   | 271.20303    | 18.0649 |

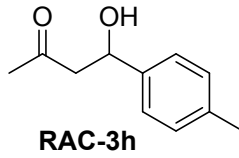

IA 95/05 1.0 ml/min HPLC2

```

=====
Injection Date   : 08/09/2015 10:36:56
Sample Name     : RG1539HY                      Location  : Vial 1
Acq. Operator  : RG
Acq. Instrument : HPLC 2                        Inj Volume: 8 µl
Acq. Method    : C:\HPCHEM\2\METHODS\C1.M
Last changed   : 08/09/2015 10:35:54 by RG
                (modified after loading)
Analysis Method: C:\HPCHEM\2\METHODS\C1.M
Last changed   : 03/06/2015 20:03:47 by RG
=====

```

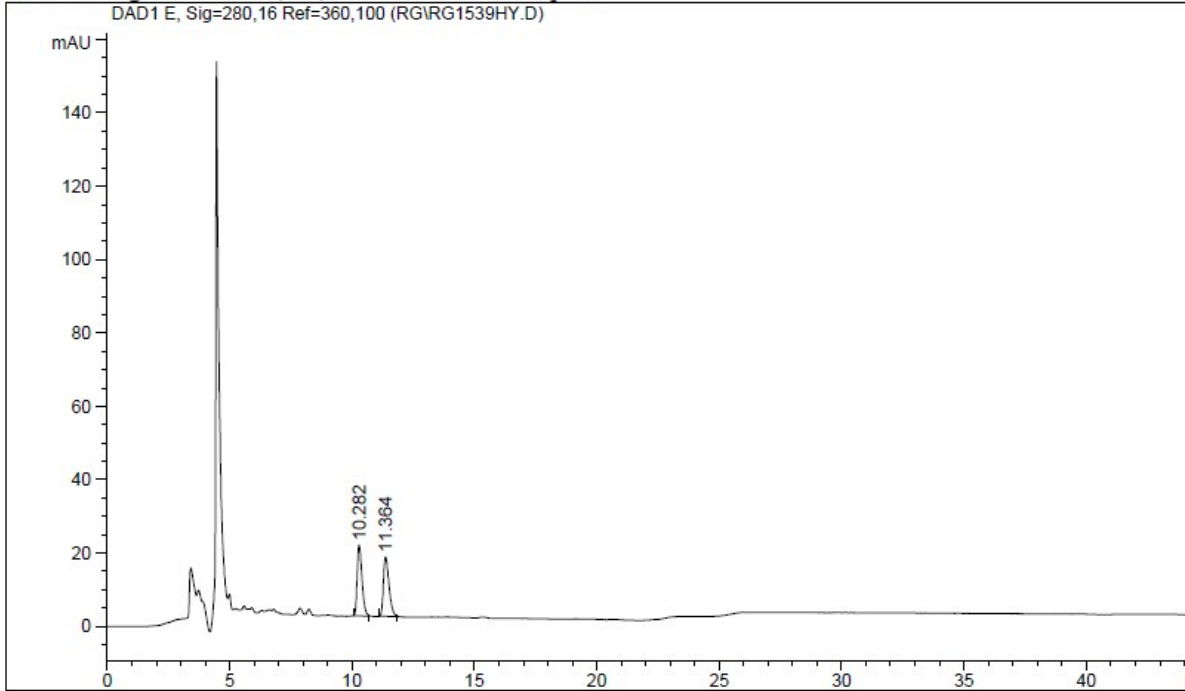

=====  
Area Percent Report  
=====

```

Sorted By      :      Signal
Multiplier    :      1.0000
Dilution      :      1.0000
Sample Amount  :      1.00000 [ng/ul]   (not used in calc.)
Use Multiplier & Dilution Factor with ISTDs

```

Signal 1: DAD1 E, Sig=280,16 Ref=360,100

| Peak # | RetTime [min] | Type | Width [min] | Area [mAU*s] | Height [mAU] | Area %  |
|--------|---------------|------|-------------|--------------|--------------|---------|
| 1      | 10.282        | BB   | 0.2108      | 267.14706    | 19.38325     | 50.6868 |
| 2      | 11.364        | BB   | 0.2484      | 259.90768    | 16.26430     | 49.3132 |

Totals :                                   527.05475   35.64755

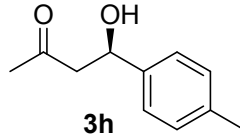

IA 95/05 1.0 ml/min HPLC2

```

=====
Injection Date   : 08/09/2015 12:25:55
Sample Name     : RG1542HY
Acq. Operator   : RG
Acq. Instrument : HPLC 2
Acq. Method    : C:\HPCHEM\2\METHODS\C1.M
Last changed   : 08/09/2015 11:55:25 by RG
                  (modified after loading)
Analysis Method : C:\HPCHEM\2\METHODS\C1.M
Last changed   : 03/06/2015 20:03:47 by RG
Location       : Vial 3
Inj Volume    : 15 µl
  
```

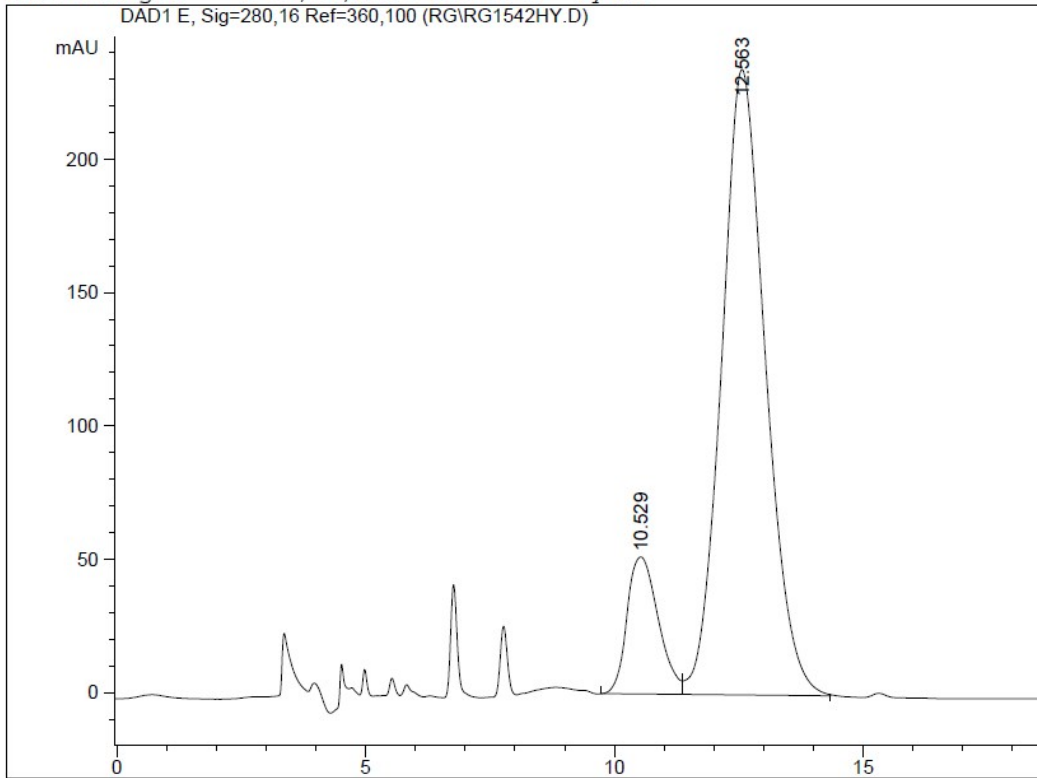

=====  
 Area Percent Report  
 =====

```

Sorted By      : Signal
Multiplier    : 1.0000
Dilution      : 1.0000
Sample Amount  : 1.00000 [ng/ul] (not used in calc.)
Use Multiplier & Dilution Factor with ISTDs
  
```

Signal 1: DAD1 E, Sig=280,16 Ref=360,100

| Peak # | RetTime [min] | Type | Width [min] | Area [mAU*s] | Height [mAU] | Area %  |
|--------|---------------|------|-------------|--------------|--------------|---------|
| 1      | 10.529        | PV   | 0.6806      | 2249.93433   | 51.40871     | 13.4973 |
| 2      | 12.563        | VB   | 0.9250      | 1.44195e4    | 234.62718    | 86.5027 |

Totals : 1.66695e4 286.03589

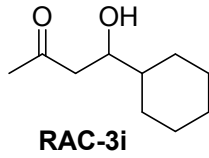

AS, 90:10, 1

```

=====
Injection Date   : 02/09/2015 13:04:28
Sample Name     : RG1534
Acq. Operator   : RG
Acq. Instrument : HPLC 2
Acq. Method     : C:\HPCHEM\2\METHODS\C5.M
Last changed    : 02/09/2015 13:02:08 by RG
                  (modified after loading)
Analysis Method : C:\HPCHEM\2\METHODS\C5.M
Last changed    : 21/04/2015 18:07:24 by JW
=====
  
```

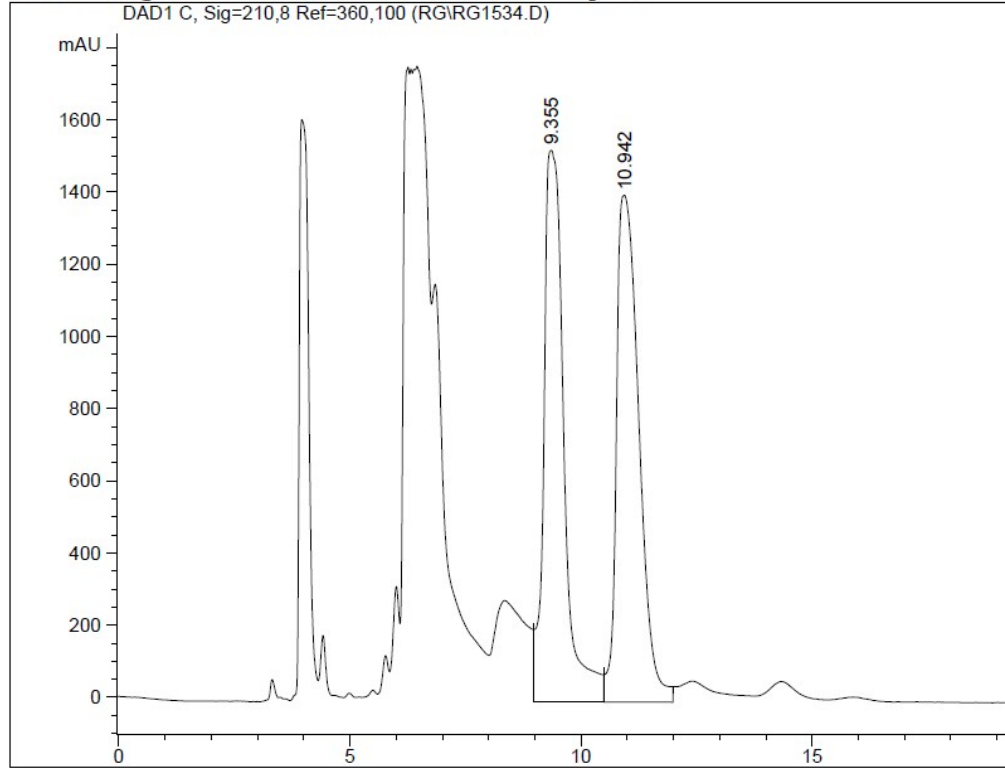

=====  
 Area Percent Report  
 =====

```

Sorted By      : Signal
Multiplier     : 1.0000
Dilution       : 1.0000
Sample Amount  : 1.00000 [ng/ul] (not used in calc.)
Use Multiplier & Dilution Factor with ISTDs
  
```

Signal 1: DAD1 C, Sig=210,8 Ref=360,100

| Peak # | RetTime [min] | Type | Width [min] | Area [mAU*s] | Height [mAU] | Area %  |
|--------|---------------|------|-------------|--------------|--------------|---------|
| 1      | 9.355         | VV   | 0.3687      | 4.62299e4    | 1529.21277   | 49.3111 |
| 2      | 10.942        | VB   | 0.4105      | 4.75216e4    | 1405.33533   | 50.6889 |

Totals : 9.37515e4 2934.54810

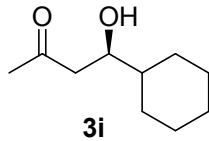

50% ee

AS 90/10 1.0 ml/min HPLC2

```

=====
Injection Date   : 04/09/2015 12:35:15
Sample Name     : RG1533Q                               Location  : Vial 1
Acq. Operator   : RG
Acq. Instrument : HPLC 2                               Inj Volume: 8 µl
Acq. Method     : C:\HPCHEM\2\METHODS\C5.M
Last changed    : 04/09/2015 12:28:11 by JW
                  (modified after loading)
Analysis Method : C:\HPCHEM\2\METHODS\C5.M
Last changed    : 02/09/2015 14:39:07 by RG
=====
  
```

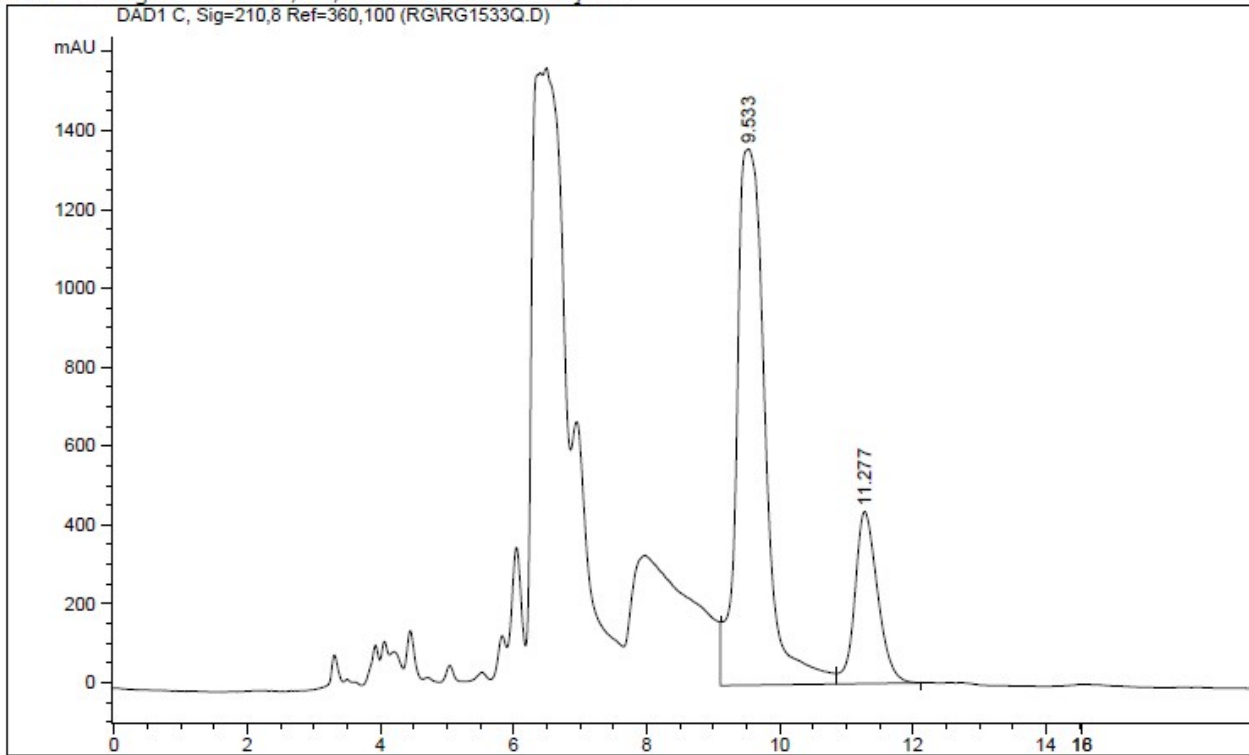

=====  
 Area Percent Report  
 =====

```

Sorted By      :      Signal
Multiplier     :      1.0000
Dilution       :      1.0000
Sample Amount  :      1.00000 [ng/ul]   (not used in calc.)
Use Multiplier & Dilution Factor with ISTDs
  
```

Signal 1: DAD1 C, Sig=210,8 Ref=360,100

| Peak # | RetTime [min] | Type | Width [min] | Area [mAU*s] | Height [mAU] | Area %  |
|--------|---------------|------|-------------|--------------|--------------|---------|
| 1      | 9.533         | VV   | 0.3671      | 4.04648e4    | 1360.06921   | 79.5326 |
| 2      | 11.277        | VB   | 0.3642      | 1.04134e4    | 436.62479    | 20.4674 |

Totals :                                    5.08783e4  1796.69400



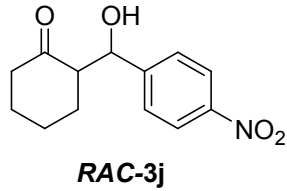

HPLC 2 ADH 90/10 1.0ml/min

```

=====
Injection Date   : 23/06/2014 10:35:13
Sample Name     : lsrac
Acq. Operator   : ls
Acq. Instrument : HPLC 2
Acq. Method     : C:\HPCHEM\2\METHODS\C5.M
Last changed    : 23/06/2014 10:10:06 by ls
                  (modified after loading)
Analysis Method : C:\HPCHEM\2\METHODS\C4.M
Last changed    : 30/07/2015 14:54:31 by RG
=====
  
```

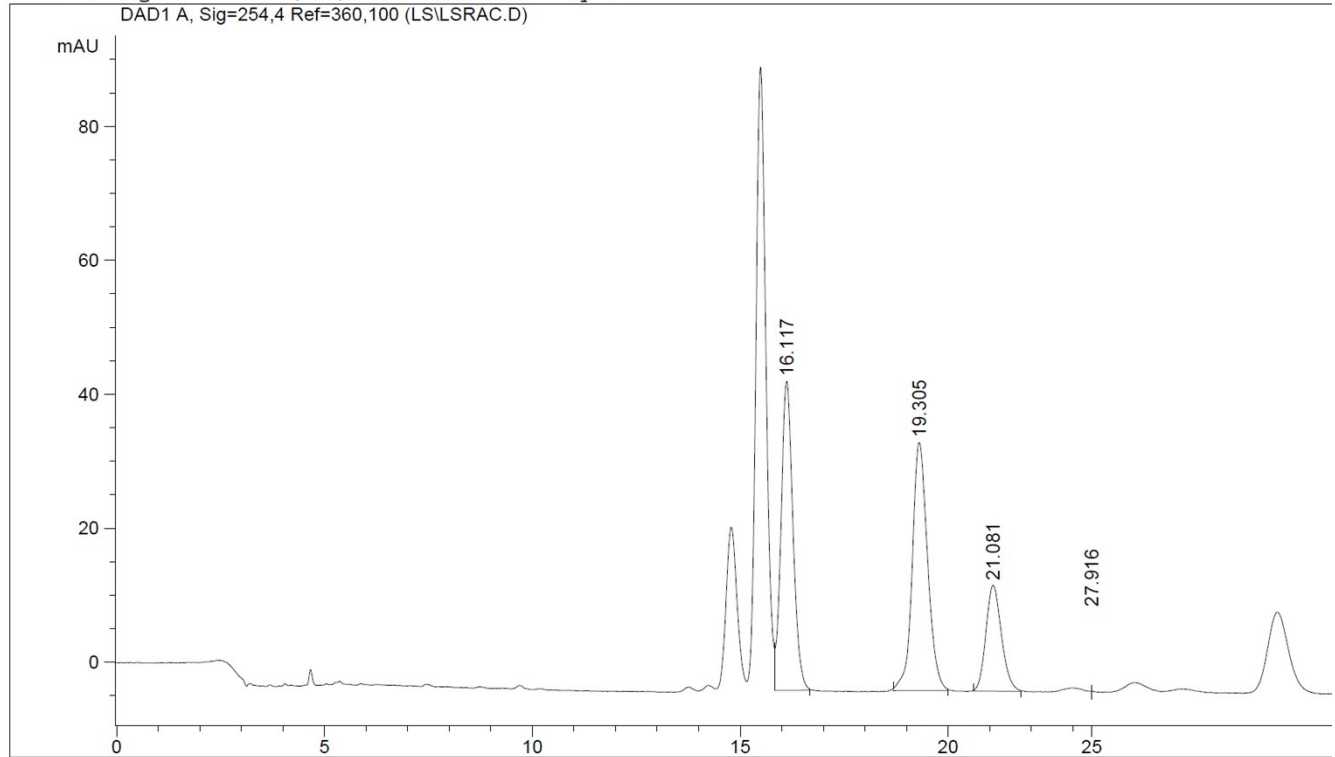

=====  
 Area Percent Report  
 =====

```

Sorted By       : Signal
Multiplier      : 1.0000
Dilution       : 1.0000
Sample Amount   : 1.00000 [ng/ul] (not used in calc.)
Use Multiplier & Dilution Factor with ISTDs
  
```

Signal 1: DAD1 A, Sig=254,4 Ref=360,100

| Peak # | RetTime [min] | Type | Width [min] | Area [mAU*s] | Height [mAU] | Area %  |
|--------|---------------|------|-------------|--------------|--------------|---------|
| 1      | 16.117        | VB   | 0.3040      | 917.96014    | 46.17144     | 34.0357 |
| 2      | 19.305        | BB   | 0.3866      | 948.96857    | 37.07191     | 35.1854 |
| 3      | 21.081        | BB   | 0.3955      | 411.67584    | 15.82568     | 15.2639 |
| 4      | 27.916        | BB   | 0.4854      | 418.44864    | 12.10217     | 15.5150 |

Totals : 2697.05319 111.17120

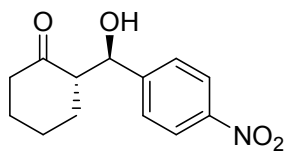

**anti-3j**

HPLC 2 ADH 90/10 1.0ml/min

```

=====
Injection Date   : 20/06/2014 14:44:49          Seq. Line :    5
Sample Name     : LS95                          Location  : Vial 41
Acq. Operator   : ls                            Inj       :    1
Acq. Instrument : HPLC 2                        Inj Volume: 3 µl
Acq. Method     : C:\HPCHEM\2\METHODS\C5.M
Last changed    : 20/06/2014 12:38:25 by ls
Analysis Method : C:\HPCHEM\2\METHODS\C4.M
Last changed    : 30/07/2015 14:54:31 by RG
=====

```

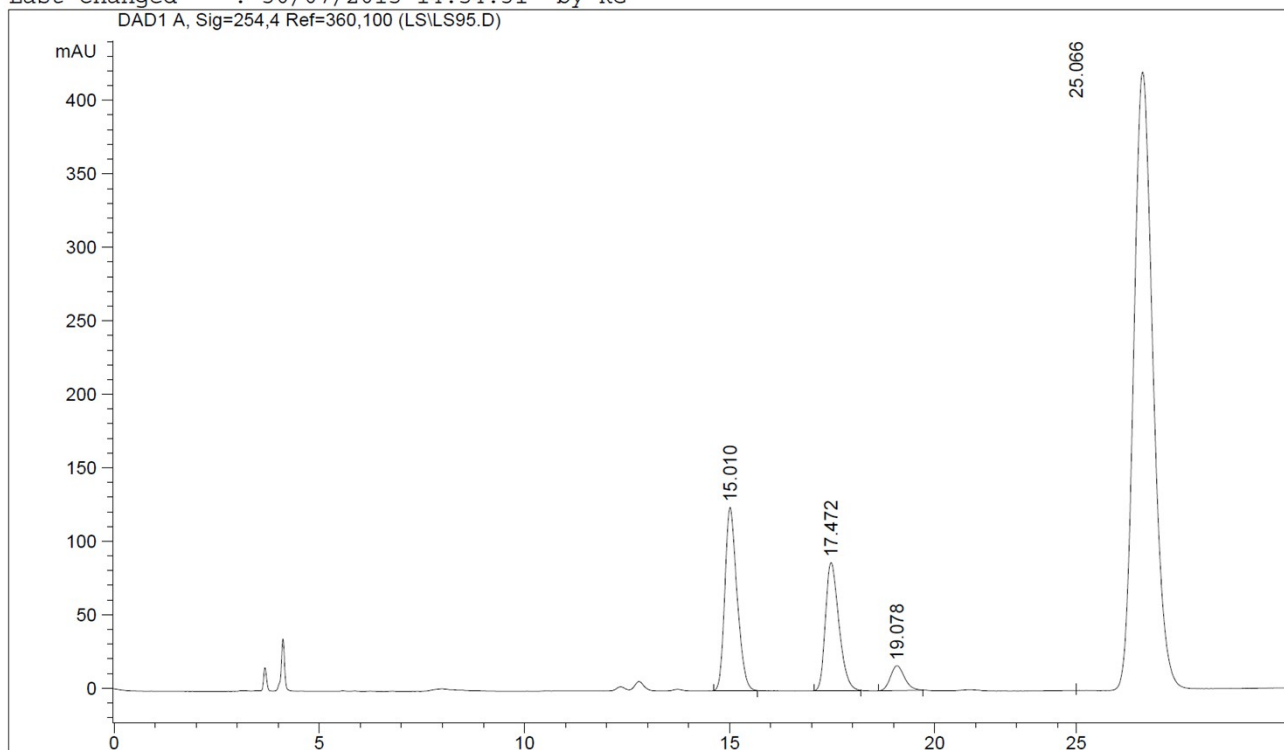

=====  
**Area Percent Report**  
=====

```

Sorted By      :      Signal
Multiplier     :      1.0000
Dilution      :      1.0000
Use Multiplier & Dilution Factor with ISTDs

```

Signal 1: DAD1 A, Sig=254,4 Ref=360,100

| Peak # | RetTime [min] | Type | Width [min] | Area [mAU*s] | Height [mAU] | Area %  |
|--------|---------------|------|-------------|--------------|--------------|---------|
| 1      | 15.010        | BB   | 0.3108      | 2576.81396   | 124.82218    | 13.8390 |
| 2      | 17.472        | BB   | 0.3487      | 1993.60449   | 87.22513     | 10.7068 |
| 3      | 19.078        | BB   | 0.3686      | 403.98499    | 16.91656     | 2.1696  |
| 4      | 25.066        | BB   | 0.5048      | 1.36455e4    | 420.21802    | 73.2845 |

Totals :                                    1.86199e4    649.18189

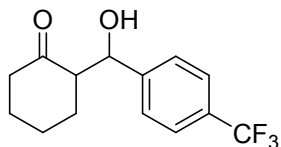

**RAC-3k**

AD, 90:10 (Hx:iPrOH), 0.5 mL/min, HPLC2

```

=====
Injection Date   : 06/03/2015 10:31:11
Sample Name     : RG1554
Acq. Operator   : RG
Acq. Instrument : HPLC 2
Acq. Method     : C:\HPCHEM\2\METHODS\C4.M
Last changed    : 06/03/2015 9:52:40 by RG
                  (modified after loading)
Analysis Method : C:\HPCHEM\1\METHODS\RG.M
Last changed    : 23/07/2015 18:37:52 by PZ
=====
  
```

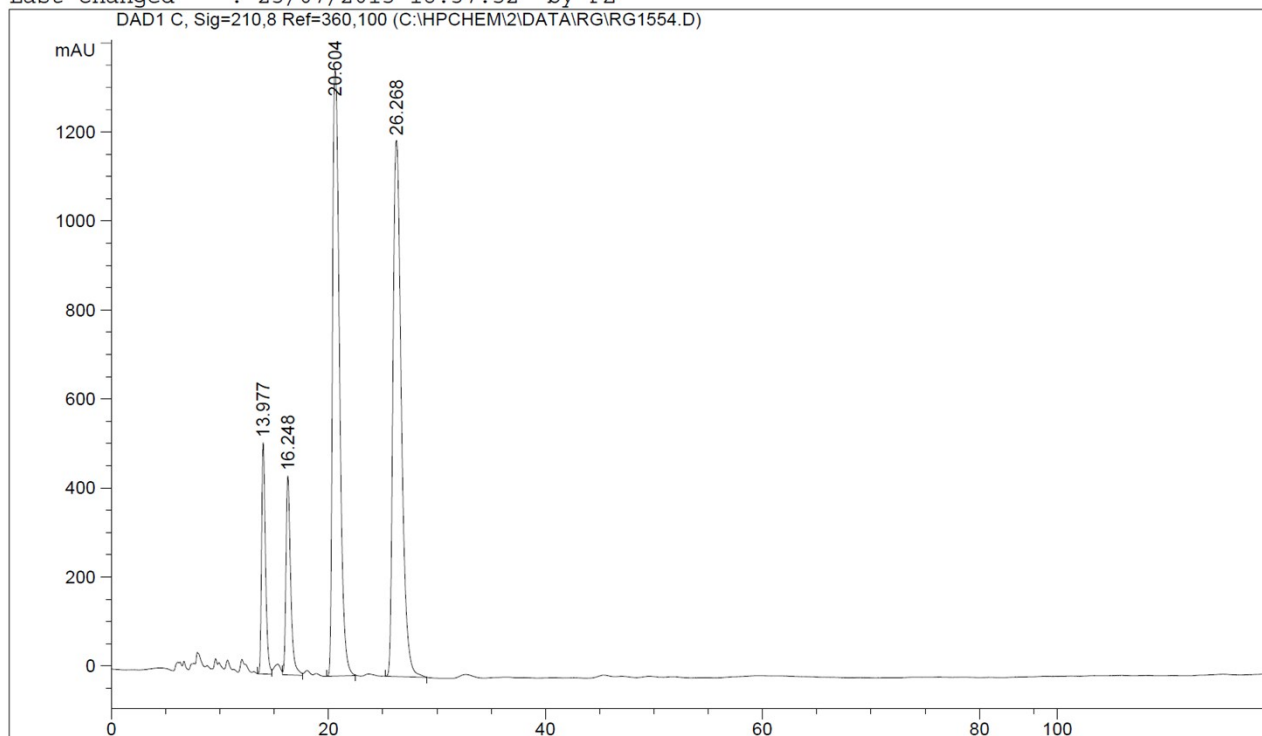

=====  
 Area Percent Report  
 =====

```

Sorted By       : Signal
Multiplier     : 1.0000
Dilution       : 1.0000
Sample Amount   : 1.00000 [ng/ul] (not used in calc.)
Use Multiplier & Dilution Factor with ISTDs
  
```

Signal 1: DAD1 C, Sig=210,8 Ref=360,100

| Peak # | RetTime [min] | Type | Width [min] | Area [mAU*s] | Height [mAU] | Area %  |
|--------|---------------|------|-------------|--------------|--------------|---------|
| 1      | 13.977        | VV   | 0.3773      | 1.28868e4    | 519.75317    | 8.5216  |
| 2      | 16.248        | VV   | 0.4459      | 1.34068e4    | 447.05405    | 8.8655  |
| 3      | 20.604        | VB   | 0.5956      | 6.03721e4    | 1360.78552   | 39.9222 |
| 4      | 26.268        | VB   | 0.7753      | 6.45588e4    | 1204.58386   | 42.6907 |

Totals : 1.51225e5 3532.17661

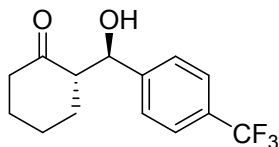

**anti-3k**

AD, 90:10 (Hx:iPrOH), 0.5 mL/min, HPLC2

```

=====
Injection Date   : 06/03/2015 12:25:55
Sample Name     : RG1555
Acq. Operator   : RG
Acq. Instrument : HPLC 2
Acq. Method     : C:\HPCHEM\2\METHODS\C4.M
Last changed    : 06/03/2015 9:52:40 by RG
                  (modified after loading)
Analysis Method : C:\HPCHEM\1\METHODS\RG.M
Last changed    : 23/07/2015 18:37:52 by PZ
=====
  
```

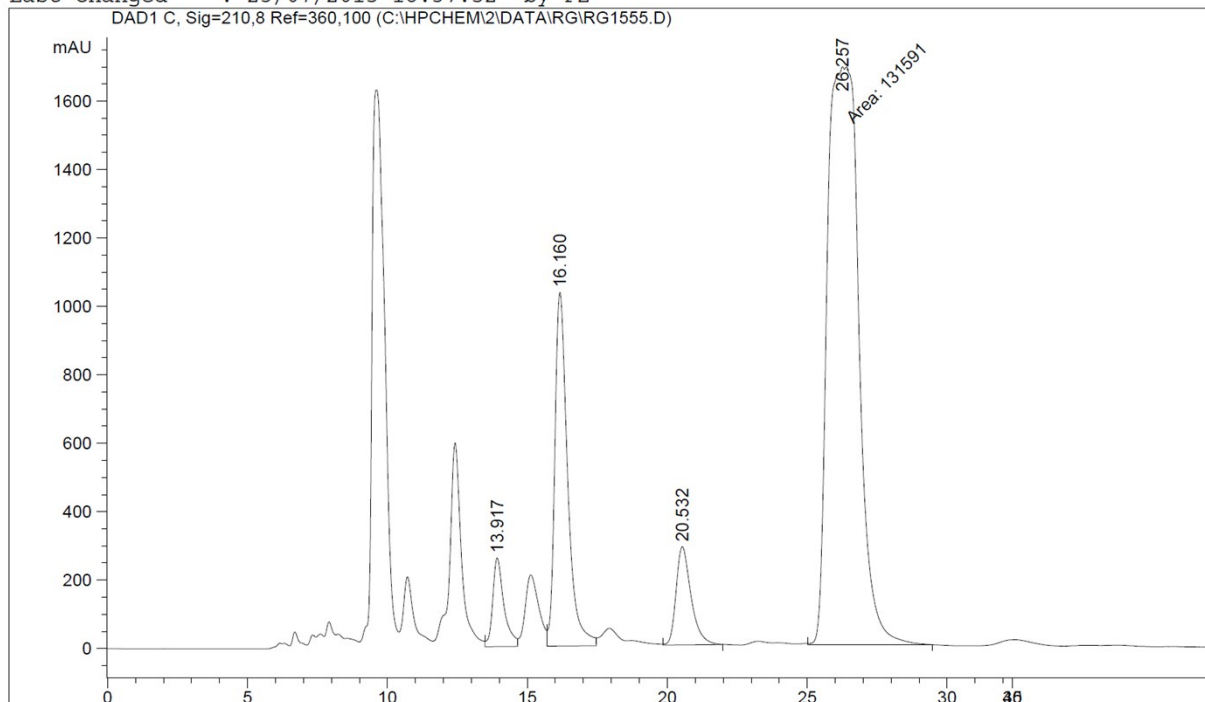

=====  
 Area Percent Report  
 =====

```

Sorted By      :      Signal
Multiplier     :      1.0000
Dilution       :      1.0000
Sample Amount  :      1.00000 [ng/ul] (not used in calc.)
Use Multiplier & Dilution Factor with ISTDs
  
```

Signal 1: DAD1 C, Sig=210,8 Ref=360,100

| Peak # | RetTime [min] | Type | Width [min] | Area [mAU*s] | Height [mAU] | Area %  |
|--------|---------------|------|-------------|--------------|--------------|---------|
| 1      | 13.917        | VV   | 0.4083      | 7262.95410   | 259.68967    | 3.9818  |
| 2      | 16.160        | VV   | 0.4792      | 3.28922e4    | 1033.71313   | 18.0327 |
| 3      | 20.532        | VB   | 0.5588      | 1.06572e4    | 287.26599    | 5.8426  |
| 4      | 26.257        | MM   | 1.2976      | 1.31591e5    | 1690.16077   | 72.1428 |

Totals : 1.82403e5 3270.82956

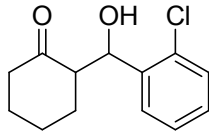

**RAC-3I**

ODH, 95:05 (Hx:iPrOH), 1 mL/min, HPLC2

```

=====
Injection Date   : 06/03/2015 18:38:54
Sample Name     : RG1556                               Location : Vial 1
Acq. Operator   : RG
Acq. Instrument : HPLC 2                               Inj Volume : 7 µl
Acq. Method     : C:\HPCHEM\2\METHODS\C6_1_60.M
Last changed    : 06/03/2015 18:37:53 by RG
                  (modified after loading)
Analysis Method : C:\HPCHEM\2\METHODS\C4.M
Last changed    : 30/07/2015 14:54:31 by RG
=====
  
```

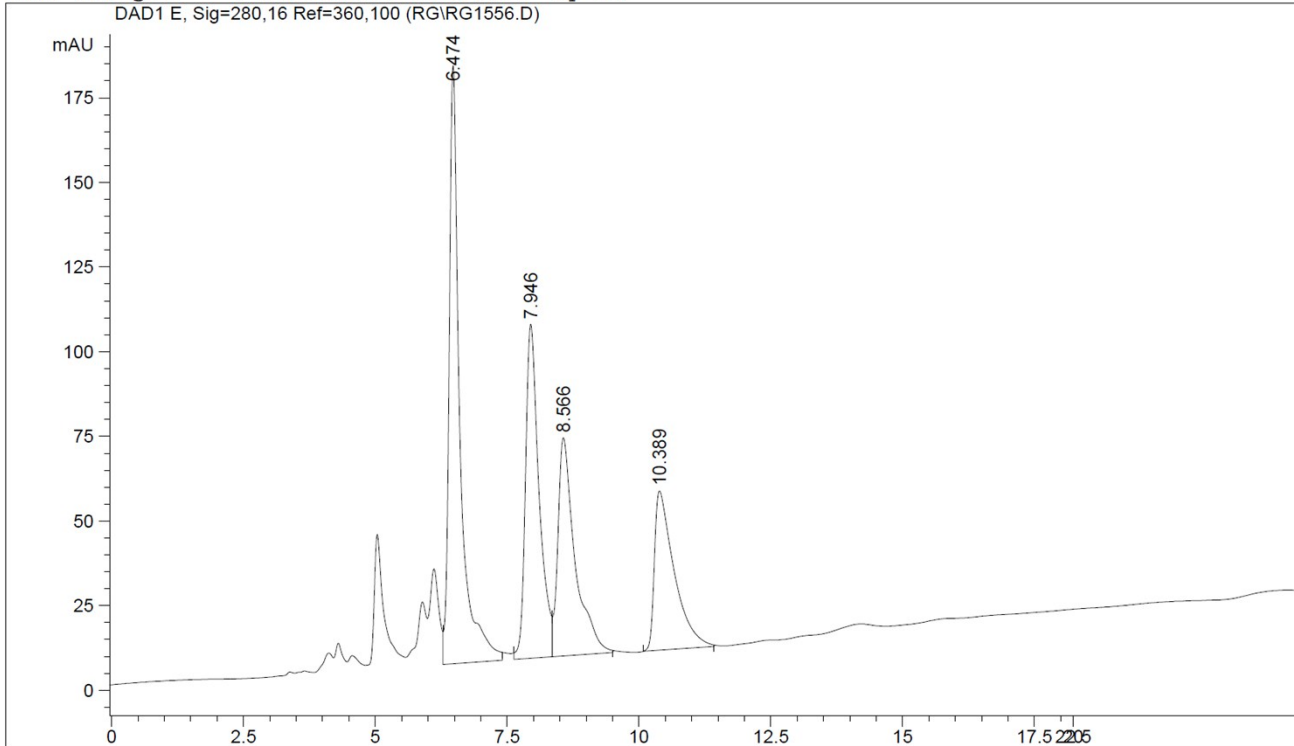

=====  
**Area Percent Report**  
=====

```

Sorted By      :      Signal
Multiplier     :      1.0000
Dilution       :      1.0000
Sample Amount  :      1.00000 [ng/ul]   (not used in calc.)
Use Multiplier & Dilution Factor with ISTDs
  
```

Signal 1: DAD1 E, Sig=280,16 Ref=360,100

| Peak # | RetTime [min] | Type | Width [min] | Area [mAU*s] | Height [mAU] | Area %  |
|--------|---------------|------|-------------|--------------|--------------|---------|
| 1      | 6.474         | VB   | 0.2046      | 2523.46802   | 176.75989    | 36.1548 |
| 2      | 7.946         | BV   | 0.2651      | 1768.99951   | 98.67942     | 25.3452 |
| 3      | 8.566         | VB   | 0.3247      | 1463.08948   | 64.48297     | 20.9623 |
| 4      | 10.389        | PB   | 0.3715      | 1224.06628   | 47.04834     | 17.5377 |

Totals :                            6979.62329   386.97062

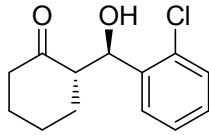

**anti-3I**

**55% ee**

ODH, 95:05 (Hx:iPrOH), 1 mL/min, HPLC2

```

=====
Injection Date   : 06/03/2015 19:03:48
Sample Name     : RG1557                      Location  : Vial 2
Acq. Operator  : RG
Acq. Instrument : HPLC 2                      Inj Volume: 7 µl
Acq. Method    : C:\HPCHEM\2\METHODS\C6_1_60.M
Last changed   : 06/03/2015 18:37:53 by RG
                  (modified after loading)
Analysis Method : C:\HPCHEM\1\METHODS\RG.M
Last changed   : 23/07/2015 18:37:52 by PZ
=====
  
```

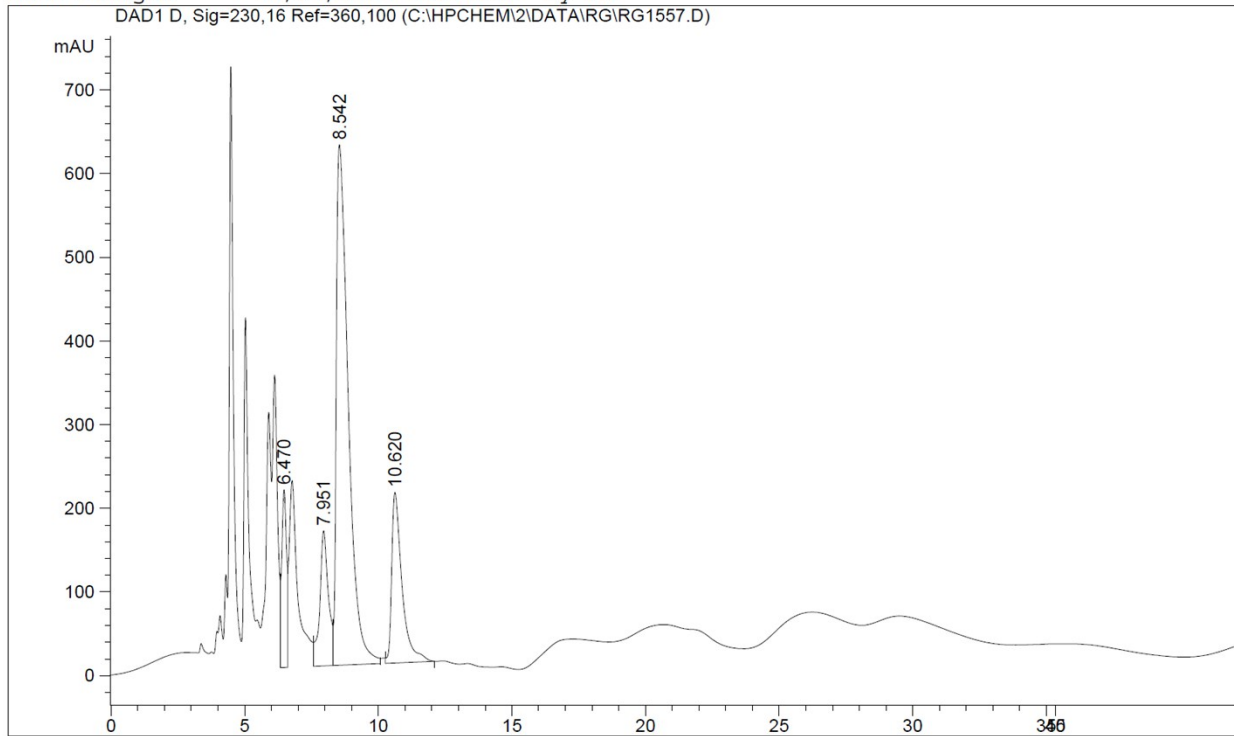

=====  
**Area Percent Report**  
 =====

```

Sorted By      : Signal
Multiplier    : 1.0000
Dilution      : 1.0000
Sample Amount  : 1.00000 [ng/ul] (not used in calc.)
Use Multiplier & Dilution Factor with ISTDs
  
```

Signal 1: DAD1 D, Sig=230,16 Ref=360,100

| Peak # | RetTime [min] | Type | Width [min] | Area [mAU*s] | Height [mAU] | Area %  |
|--------|---------------|------|-------------|--------------|--------------|---------|
| 1      | 6.470         | VV   | 0.1810      | 2644.22144   | 212.68977    | 8.5163  |
| 2      | 7.951         | VV   | 0.3194      | 3620.89087   | 161.58305    | 11.6618 |
| 3      | 8.542         | VB   | 0.4799      | 1.92941e4    | 621.99628    | 62.1406 |
| 4      | 10.620        | BB   | 0.3961      | 5489.87207   | 203.91116    | 17.6813 |

Totals : 3.10491e4 1200.18027

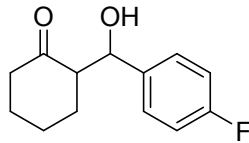

RAC-3m

ADH, 90:10 (Hx:iPrOH), 0.3 mL/min, HPLC2

```

=====
Injection Date   : 06/03/2015 13:26:27
Sample Name      : RG1558
Acq. Operator    : RG
Acq. Instrument  : HPLC 2
Acq. Method      : C:\HPCHEM\2\METHODS\C5.M
Last changed     : 06/03/2015 13:30:27 by RG
                  (modified after loading)
Analysis Method  : C:\HPCHEM\1\METHODS\RG.M
Last changed     : 23/07/2015 18:37:52 by PZ
=====
  
```

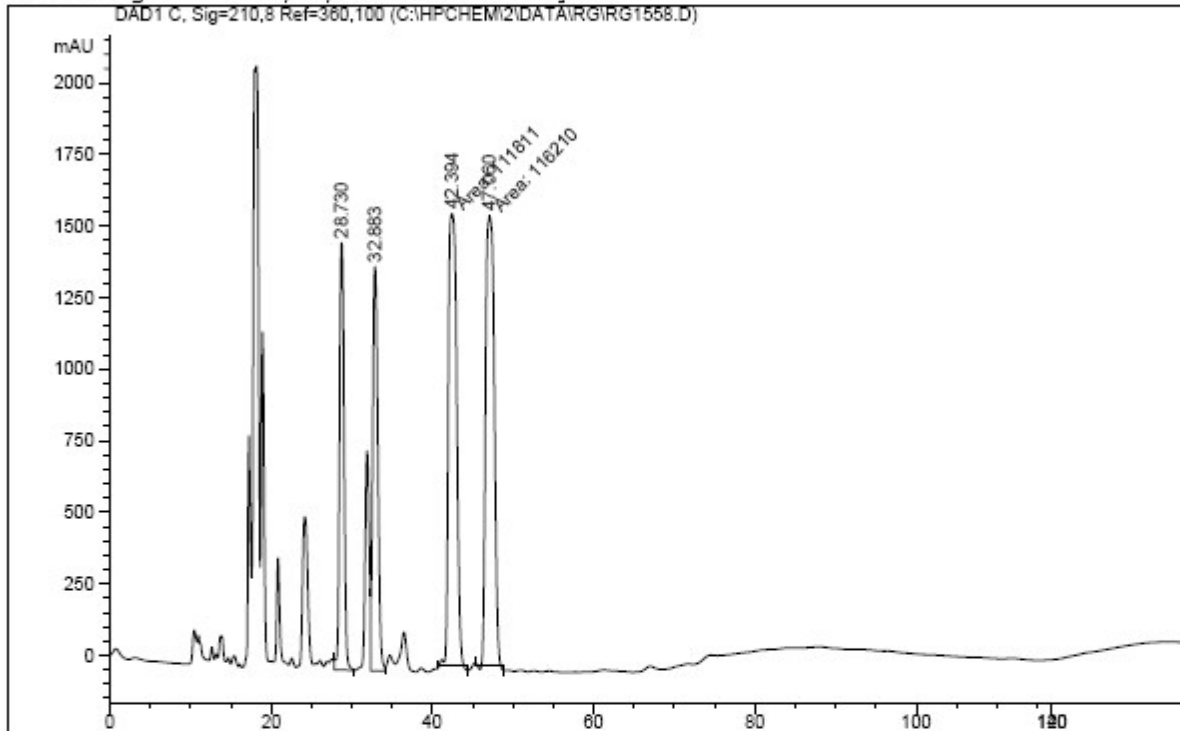

Area Percent Report

```

=====
Sorted By       : Signal
Multiplier      : 1.0000
Dilution        : 1.0000
Sample Amount   : 1.00000 [ng/ul] (not used in calc.)
Use Multiplier & Dilution Factor with ISTDs
  
```

Signal 1: DAD1 C, Sig=210,8 Ref=360,100

| Peak # | RetTime [min] | Type | Width [min] | Area [mAU*s] | Height [mAU] | Area %  |
|--------|---------------|------|-------------|--------------|--------------|---------|
| 1      | 28.730        | VP   | 0.4849      | 5.92133e4    | 1492.39417   | 16.9219 |
| 2      | 32.883        | VV   | 0.5320      | 6.26863e4    | 1411.87695   | 17.9144 |
| 3      | 42.394        | MM   | 1.1800      | 1.11811e5    | 1579.30969   | 31.9533 |
| 4      | 47.060        | MM   | 1.2313      | 1.16210e5    | 1573.00964   | 33.2103 |

Totals : 3.49921e5 6056.59045

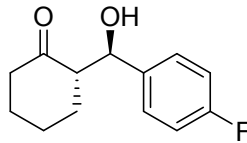

*anti-3m*

ADH, 90:10 (Hx:iPrOH), 0.3 mL/min, HPLC2

```

=====
Injection Date   : 06/03/2015 17:03:11
Sample Name     : RG1559
Acq. Operator   : RG
Acq. Instrument : HPLC 2
Acq. Method     : C:\HPCHEM\2\METHODS\C5.M
Last changed    : 06/03/2015 17:00:01 by RG
                  (modified after loading)
Analysis Method : C:\HPCHEM\1\METHODS\RG.M
Last changed    : 23/07/2015 18:37:52 by PZ
  
```

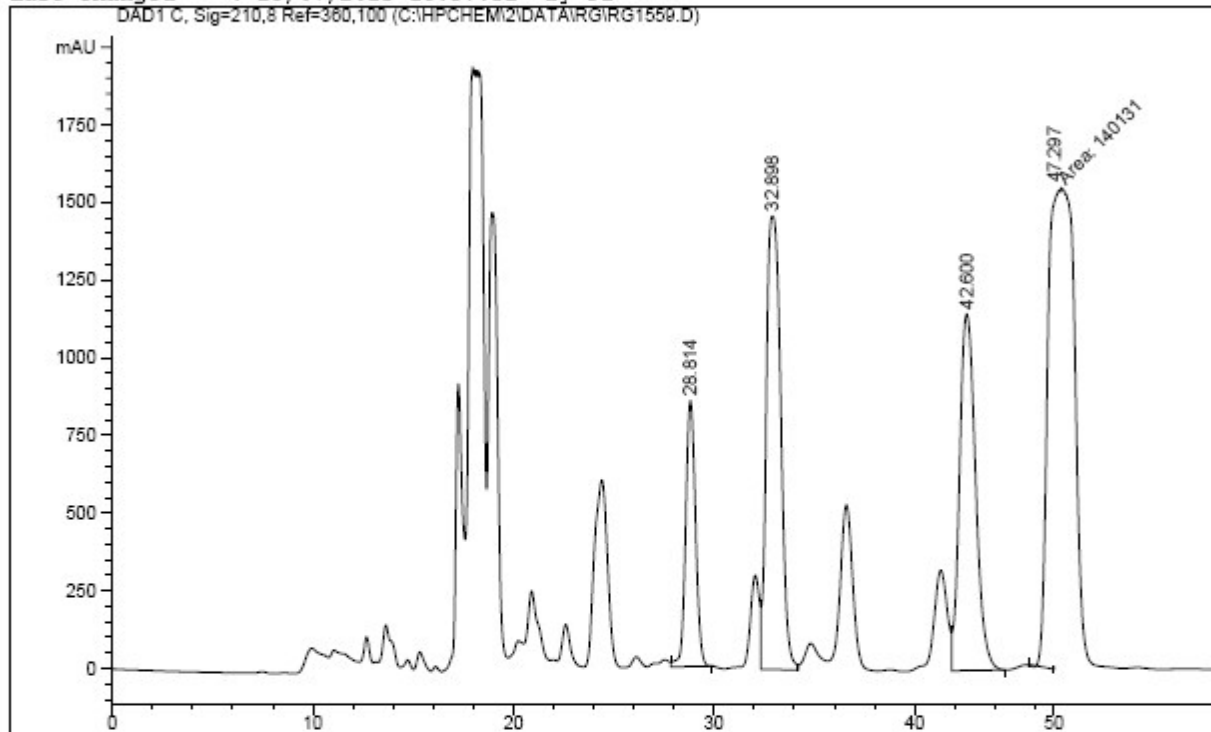

=====  
 Area Percent Report  
 =====

```

Sorted By       : Signal
Multiplier      : 1.0000
Dilution        : 1.0000
Sample Amount   : 1.00000 [ng/ul] (not used in calc.)
Use Multiplier & Dilution Factor with ISTDs
  
```

Signal 1: DAD1 C, Sig=210,8 Ref=360,100

| Peak # | RetTime [min] | Type | Width [min] | Area [mAU*s] | Height [mAU] | Area %  |
|--------|---------------|------|-------------|--------------|--------------|---------|
| 1      | 28.814        | VB   | 0.5289      | 2.92566e4    | 855.75427    | 9.5778  |
| 2      | 32.898        | VV   | 0.5943      | 7.24003e4    | 1460.62329   | 23.7018 |
| 3      | 42.600        | VB   | 0.7229      | 6.36760e4    | 1148.32288   | 20.8457 |
| 4      | 47.297        | MM   | 1.5151      | 1.40131e5    | 1541.51941   | 45.8748 |

Totals : 3.05464e5 5006.21985



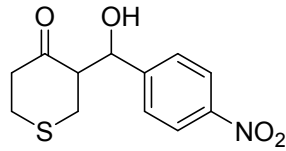

**RAC-3n**

ADH, 90:10, 1 mL/min, GPC

```

=====
Injection Date : 15/10/2015 10:12:05      Seq. Line : 1
Sample Name    : RGSV300RAC                Location  : Vial 1
Acq. Operator  : RG                       Inj      : 1
Acq. Instrument: HPLC-GPC                  Inj Volume: 8 µl
Method         : C:\HPCHEM\1\METHODS\STANDARD.M
Last changed   : 15/10/2015 10:11:15 by RG
=====
  
```

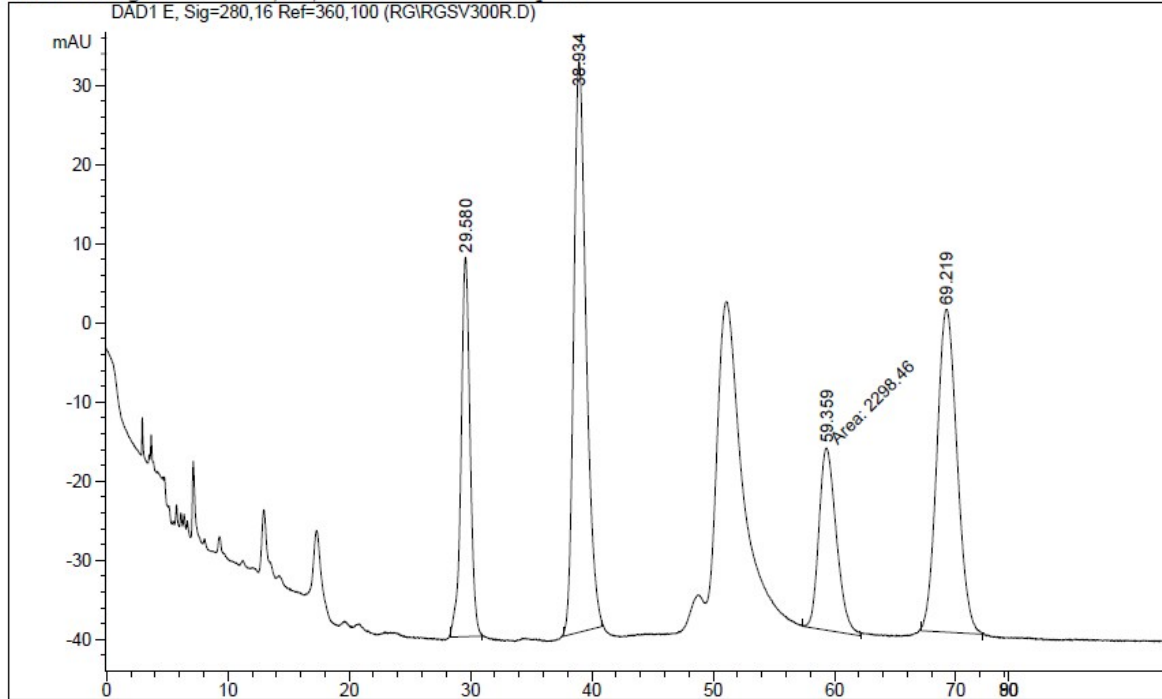

=====  
 Area Percent Report  
 =====

```

Sorted By      : Signal
Multiplier     : 1.0000
Dilution      : 1.0000
Use Multiplier & Dilution Factor with ISTDs
  
```

Signal 1: DAD1 E, Sig=280,16 Ref=360,100

| Peak # | RetTime [min] | Type | Width [min] | Area [mAU*s] | Height [mAU] | Area %  |
|--------|---------------|------|-------------|--------------|--------------|---------|
| 1      | 29.580        | BB   | 0.6447      | 2460.37231   | 47.94058     | 16.8474 |
| 2      | 38.934        | BB   | 0.9630      | 5125.66553   | 72.13313     | 35.0979 |
| 3      | 59.359        | MM   | 1.6634      | 2298.46167   | 23.02989     | 15.7387 |
| 4      | 69.219        | BB   | 1.3573      | 4719.40820   | 40.80551     | 32.3161 |

Totals :                                    1.46039e4    183.90912

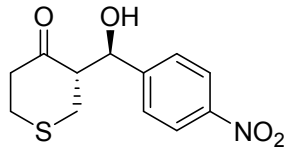

**anti-3n**

AD 90/10 , 1 ML/MIN GPC

```

=====
Injection Date   : 13/10/2015 12:08:17
Sample Name     : RG1793Q                               Location  : Vial 11
Acq. Operator   : RG
Acq. Instrument : HPLC-GPC                               Inj Volume: 8 µl
Acq. Method     : C:\HPCHEM\1\METHODS\STANDARD.M
Last changed    : 13/10/2015 12:07:19 by RG
                  (modified after loading)
Analysis Method : C:\HPCHEM\1\METHODS\STANDARD.M
Last changed    : 15/10/2015 10:11:15 by RG
=====
  
```

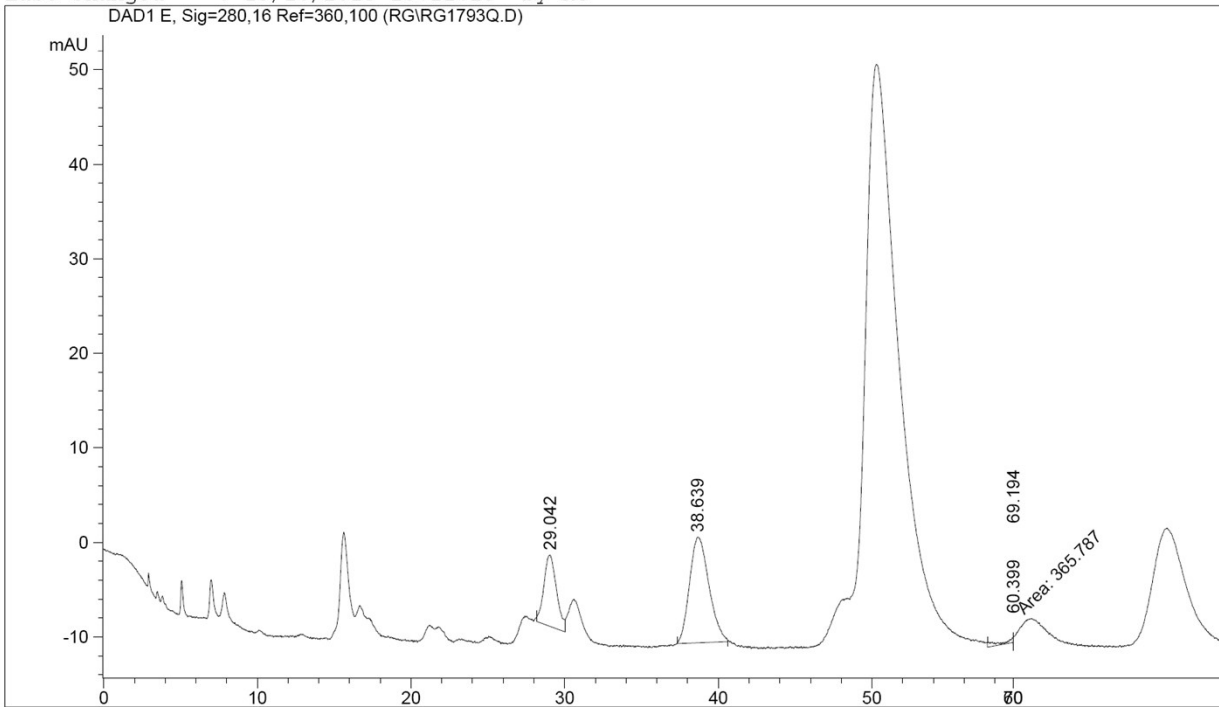

=====  
 Area Percent Report  
 =====

```

Sorted By      : Signal
Multiplier     : 1.0000
Dilution       : 1.0000
Use Multiplier & Dilution Factor with ISTDs
  
```

Signal 1: DAD1 E, Sig=280,16 Ref=360,100

| Peak # | RetTime [min] | Type | Width [min] | Area [mAU*s] | Height [mAU] | Area %  |
|--------|---------------|------|-------------|--------------|--------------|---------|
| 1      | 29.042        | BV   | 0.6801      | 431.04910    | 7.57268      | 12.6561 |
| 2      | 38.639        | BB   | 1.0294      | 981.55145    | 11.19002     | 28.8195 |
| 3      | 60.399        | MM   | 2.1645      | 365.78699    | 2.81652      | 10.7399 |
| 4      | 69.194        | BB   | 1.6194      | 1627.46692   | 11.76825     | 47.7844 |

Totals : 3405.85446 33.34747

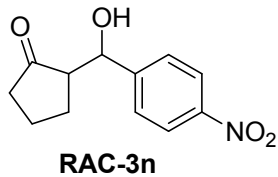

AD, 96/04-1ML/MIN, GPC

```

=====
Injection Date   : 23/01/2015 11:02:07           Seq. Line :    1
Sample Name     : RG1503                        Location  : Vial 1
Acq. Operator   : RG                           Inj       :    1
Acq. Instrument : HPLC-GPC                      Inj Volume: 8 µl
Acq. Method    : C:\HPCHEM\1\METHODS\AO.M
Last changed   : 23/01/2015 10:59:47 by RG
Analysis Method: C:\HPCHEM\1\METHODS\RG.M
Last changed   : 23/07/2015 18:37:52 by PZ
=====
  
```

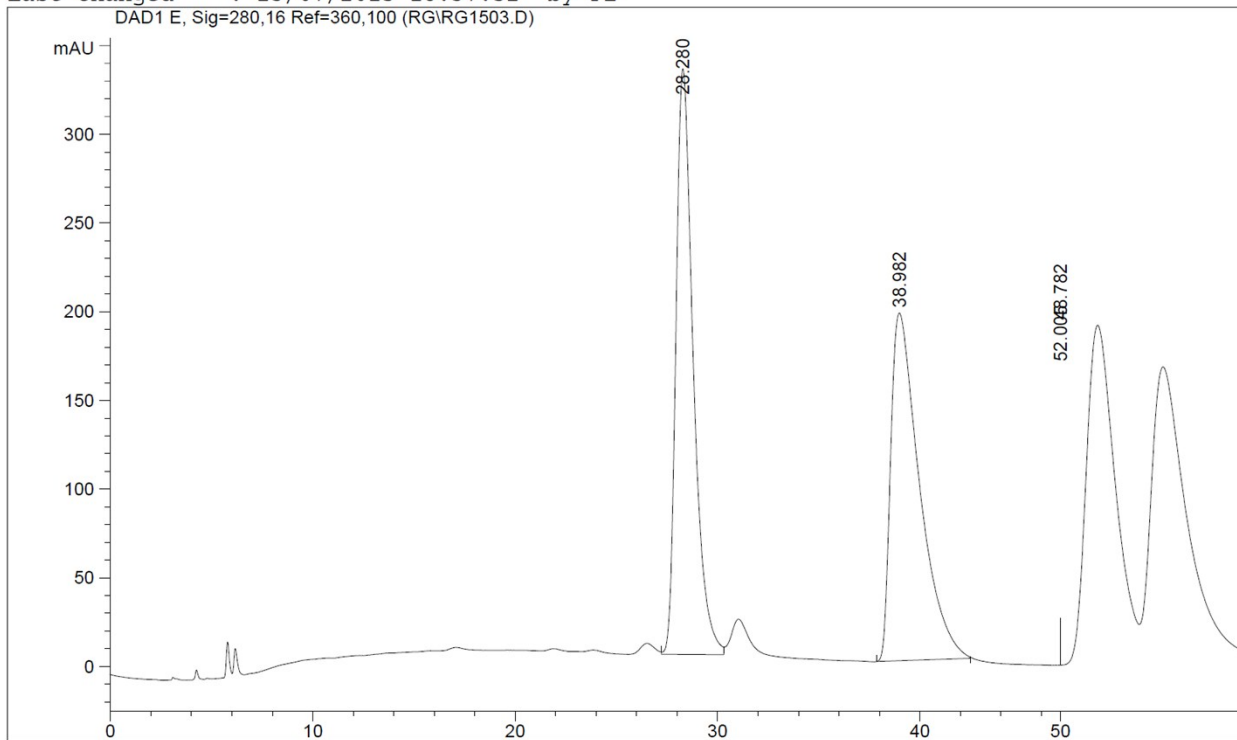

```

=====
                        Area Percent Report
=====
  
```

```

Sorted By          :      Signal
Multiplier         :      1.0000
Dilution          :      1.0000
Use Multiplier & Dilution Factor with ISTDs
  
```

Signal 1: DAD1 E, Sig=280,16 Ref=360,100

| Peak # | RetTime [min] | Type | Width [min] | Area [mAU*s] | Height [mAU] | Area %  |
|--------|---------------|------|-------------|--------------|--------------|---------|
| 1      | 28.280        | VB   | 0.8802      | 1.95906e4    | 330.19925    | 25.4740 |
| 2      | 38.982        | BB   | 1.3077      | 1.93565e4    | 196.08130    | 25.1695 |
| 3      | 48.782        | BV   | 1.3990      | 1.87075e4    | 189.95593    | 24.3257 |
| 4      | 52.005        | VB   | 1.5218      | 1.92498e4    | 163.46898    | 25.0308 |

Totals :                                    7.69045e4    879.70546

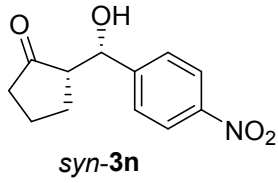

AD, 96:04 (Hx:iPrOH), 1 mL/min, HPLC2

```

=====
Injection Date  : 05/03/2015 13:33:06
Sample Name     : RG1561                      Location  : Vial 1
Acq. Operator  : RG
Acq. Instrument : HPLC 2                      Inj Volume: 7 µl
Acq. Method    : C:\HPCHEM\2\METHODS\C4.M
Last changed   : 05/03/2015 12:37:15 by JW
                (modified after loading)
Analysis Method: C:\HPCHEM\1\METHODS\RG.M
Last changed   : 23/07/2015 18:37:52 by PZ
  
```

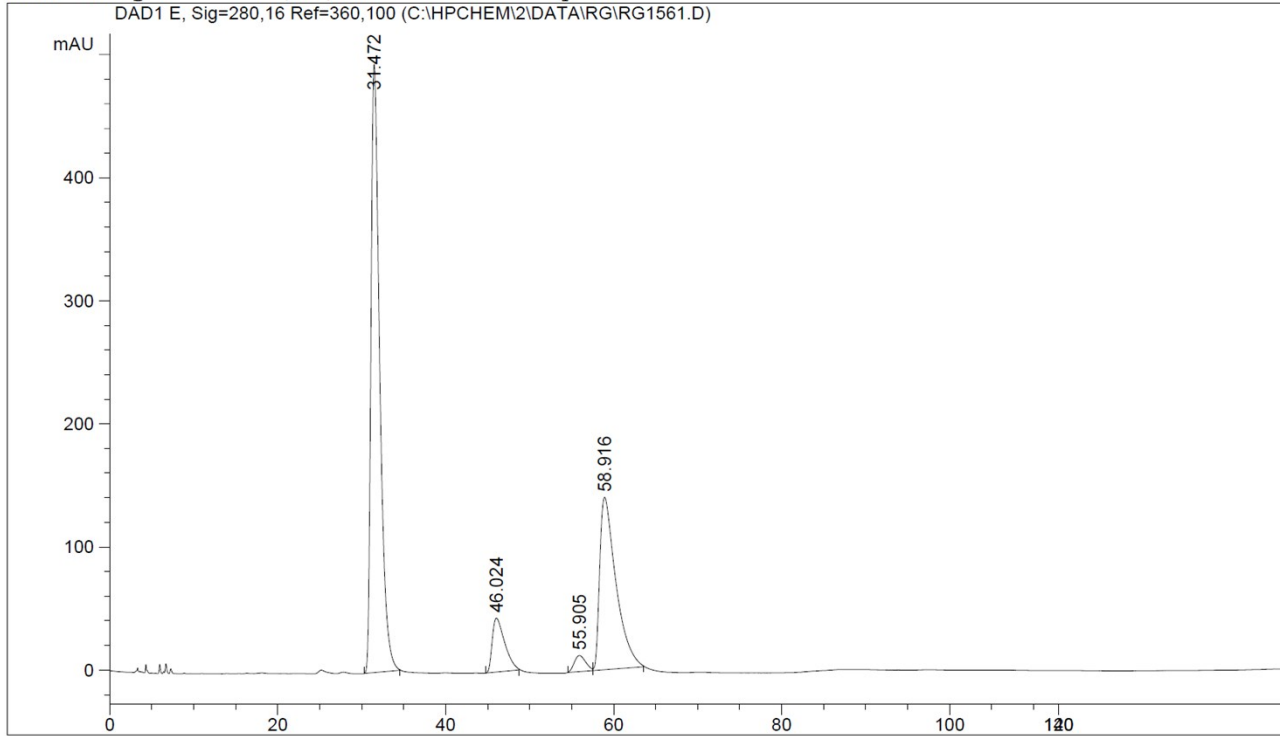

=====  
Area Percent Report  
=====

```

Sorted By           :      Signal
Multiplier          :      1.0000
Dilution            :      1.0000
Sample Amount       :      1.00000 [ng/ul]   (not used in calc.)
Use Multiplier & Dilution Factor with ISTDs
  
```

Signal 1: DAD1 E, Sig=280,16 Ref=360,100

| Peak # | RetTime [min] | Type | Width [min] | Area [mAU*s] | Height [mAU] | Area %  |
|--------|---------------|------|-------------|--------------|--------------|---------|
| 1      | 31.472        | BB   | 1.0905      | 3.56025e4    | 494.20834    | 59.1082 |
| 2      | 46.024        | BB   | 1.4078      | 4509.52588   | 43.84933     | 7.4868  |
| 3      | 55.905        | BV   | 1.1228      | 1242.34949   | 13.21519     | 2.0626  |
| 4      | 58.916        | VB   | 1.8951      | 1.88784e4    | 140.18692    | 31.3424 |

Totals : 6.02327e4 691.45979

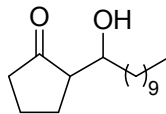

**RAC-3o**

IA, 99:01 (Hx.iPrOH), 1 mL/min, HPLC2

```

=====
Injection Date : 16/03/2015 17:28:18
Sample Name    : RG156699                      Location : Vial 11
Acq. Operator  : RG
Acq. Instrument : HPLC 2                       Inj Volume : 10 µl
Acq. Method    : C:\HPCHEM\2\METHODS\C5.M
Last changed   : 16/03/2015 17:27:19 by RG
                (modified after loading)
Analysis Method : C:\HPCHEM\2\METHODS\C4.M
Last changed   : 30/07/2015 14:54:31 by RG
=====
  
```

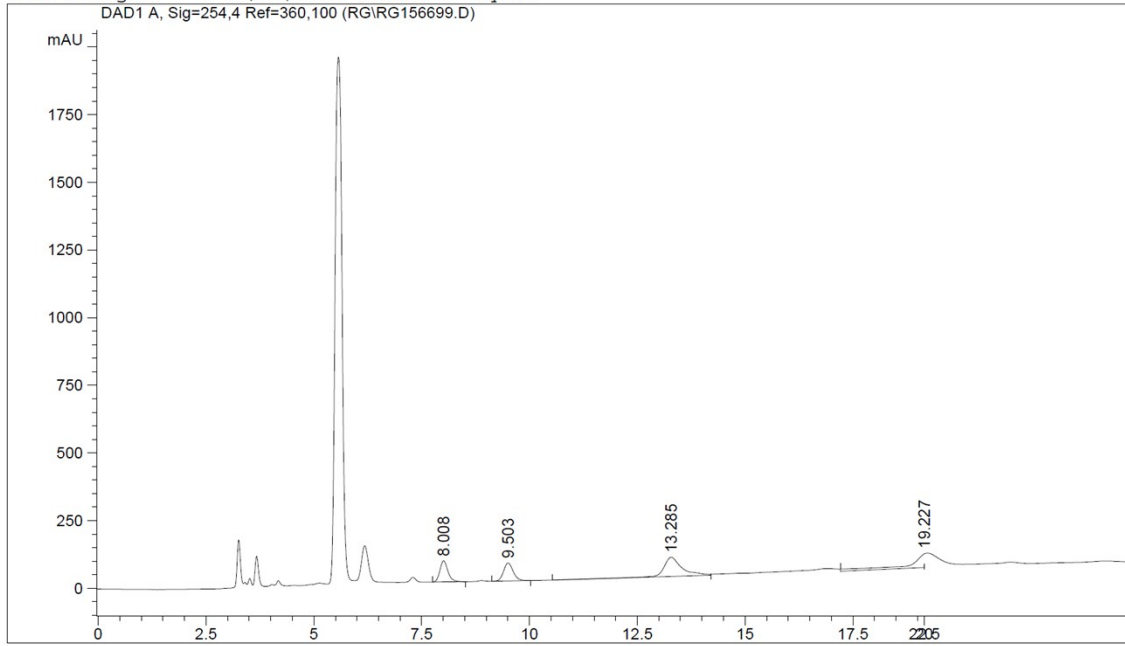

=====  
 Area Percent Report  
 =====

```

Sorted By      :      Signal
Multiplier     :      1.0000
Dilution       :      1.0000
Sample Amount  :      1.00000 [ng/ul]   (not used in calc.)
Use Multiplier & Dilution Factor with ISTDs
  
```

Signal 1: DAD1 A, Sig=254,4 Ref=360,100

| Peak # | RetTime [min] | Type | Width [min] | Area [mAU*s] | Height [mAU] | Area %  |
|--------|---------------|------|-------------|--------------|--------------|---------|
| 1      | 8.008         | PP   | 0.1992      | 1013.52234   | 78.19730     | 13.8518 |
| 2      | 9.503         | VB   | 0.2357      | 1029.51123   | 66.82724     | 14.0703 |
| 3      | 13.285        | PB   | 0.4177      | 2072.16748   | 71.17280     | 28.3202 |
| 4      | 19.227        | VV   | 0.7703      | 3201.72290   | 57.62107     | 43.7578 |

Totals :                                7316.92395    273.81840

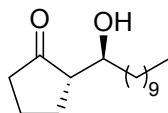

**anti-30**

IA, 99:01 (Hx:iPrOH), 1 mL/min, HPLC2

```

=====
Injection Date   : 16/03/2015 17:54:56
Sample Name     : RG156799                      Location  : Vial 12
Acq. Operator   : RG
Acq. Instrument : HPLC 2                        Inj Volume: 10 µl
Acq. Method     : C:\HPCHEM\2\METHODS\C5.M
Last changed    : 16/03/2015 17:27:19 by RG
                  (modified after loading)
Analysis Method : C:\HPCHEM\2\METHODS\C4.M
Last changed    : 30/07/2015 14:54:31 by RG
=====
  
```

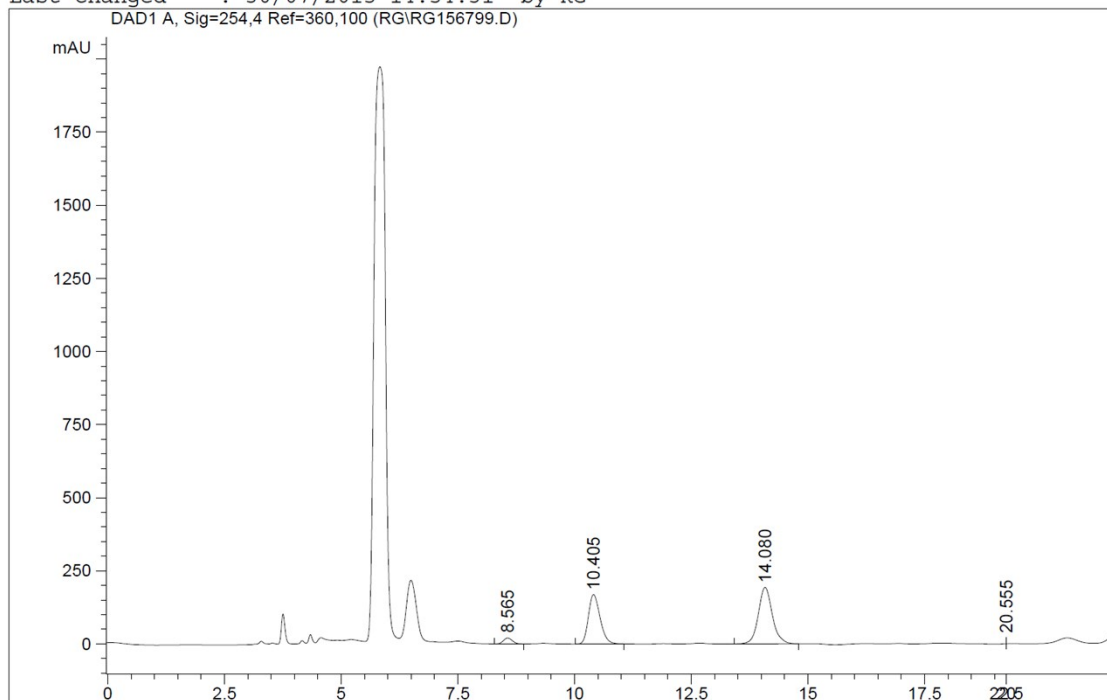

```

=====
                          Area Percent Report
=====
  
```

```

Sorted By           :      Signal
Multiplier          :      1.0000
Dilution            :      1.0000
Sample Amount       :      1.00000 [ng/ul]   (not used in calc.)
Use Multiplier & Dilution Factor with ISTDs
  
```

Signal 1: DAD1 A, Sig=254,4 Ref=360,100

| Peak # | RetTime [min] | Type | Width [min] | Area [mAU*s] | Height [mAU] | Area %  |
|--------|---------------|------|-------------|--------------|--------------|---------|
| 1      | 8.565         | VV   | 0.2084      | 275.17932    | 20.53255     | 3.4004  |
| 2      | 10.405        | VB   | 0.2716      | 2952.63647   | 169.17790    | 36.4863 |
| 3      | 14.080        | BB   | 0.3181      | 4049.59961   | 193.55028    | 50.0417 |
| 4      | 20.555        | BV   | 0.4899      | 815.03394    | 23.19522     | 10.0715 |

Totals : 8092.44934 406.45595

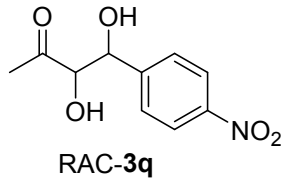

ADH 80/20 0.8 ml/min HPLC2

```

=====
Injection Date   : 22/09/2015 13:46:11
Sample Name     : RG1795RA                      Location : Vial 1
Acq. Operator  : RG
Acq. Instrument : HPLC 2                       Inj Volume : 5 µl
Acq. Method    : C:\HPCHEM\2\METHODS\C4.M
Last changed   : 22/09/2015 13:45:23 by RG
                (modified after loading)
Analysis Method : C:\HPCHEM\1\METHODS\CT100-C.M
Last changed   : 14/09/2015 11:40:40 by DA
  
```

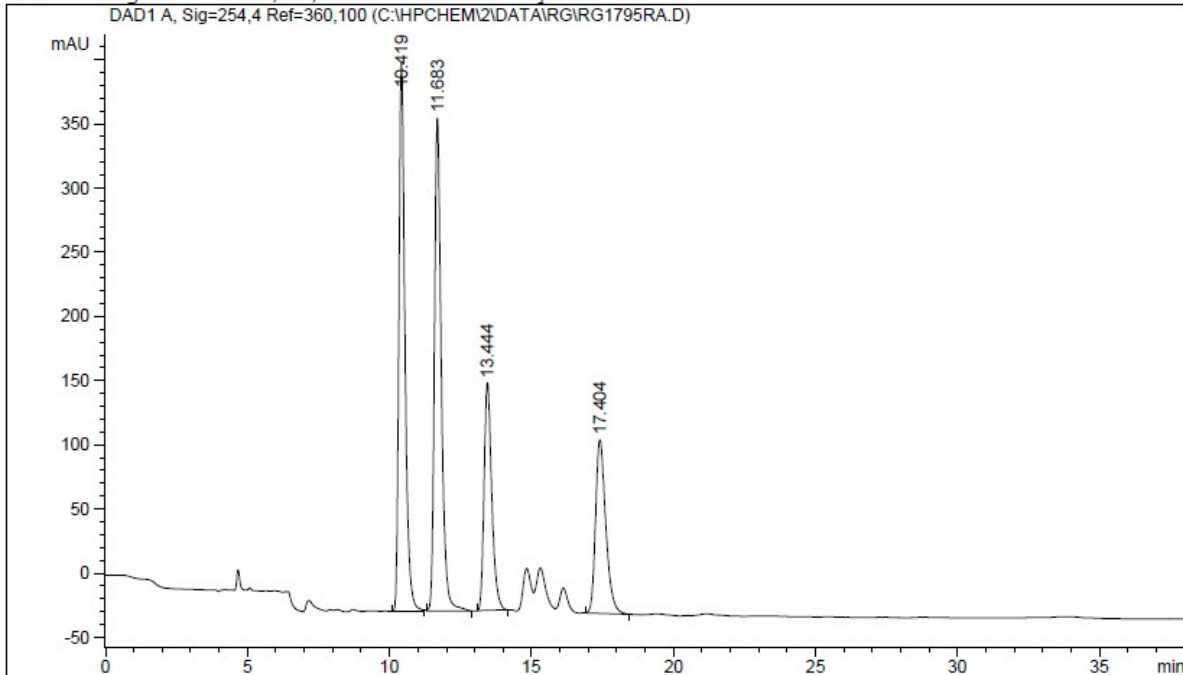

Area Percent Report

```

=====
Sorted By       : Signal
Multiplier     : 1.0000
Dilution       : 1.0000
Sample Amount  : 1.00000 [ng/ul] (not used in calc.)
Use Multiplier & Dilution Factor with ISTDs
  
```

Signal 1: DAD1 A, Sig=254,4 Ref=360,100

| Peak # | RetTime [min] | Type | Width [min] | Area [mAU*s] | Height [mAU] | Area %  |
|--------|---------------|------|-------------|--------------|--------------|---------|
| 1      | 10.419        | PB   | 0.2253      | 6352.77002   | 427.59421    | 32.5624 |
| 2      | 11.683        | BP   | 0.2536      | 6440.04395   | 384.06607    | 33.0097 |
| 3      | 13.444        | BB   | 0.2848      | 3326.01099   | 177.34363    | 17.0481 |
| 4      | 17.404        | BB   | 0.3821      | 3390.71191   | 135.43431    | 17.3798 |

Totals : 1.95095e4 1124.43822

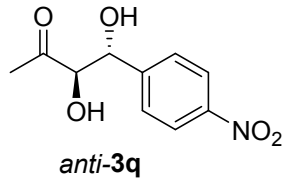

ADH (80:20 Hex/iPrOH), 0.8 mL/min, HPLC2

```

=====
Injection Date   : 07/10/2015 18:10:27
Sample Name     : RG1802QB                      Location : Vial 11
Acq. Operator  : RG
Acq. Instrument : HPLC 2                       Inj Volume : 5 µl
Acq. Method    : C:\HPCHEM\2\METHODS\C4.M
Last changed   : 07/10/2015 17:18:19 by RG
                (modified after loading)
Analysis Method : C:\HPCHEM\2\METHODS\C4.M
Last changed   : 17/09/2015 16:22:39 by RG
=====
  
```

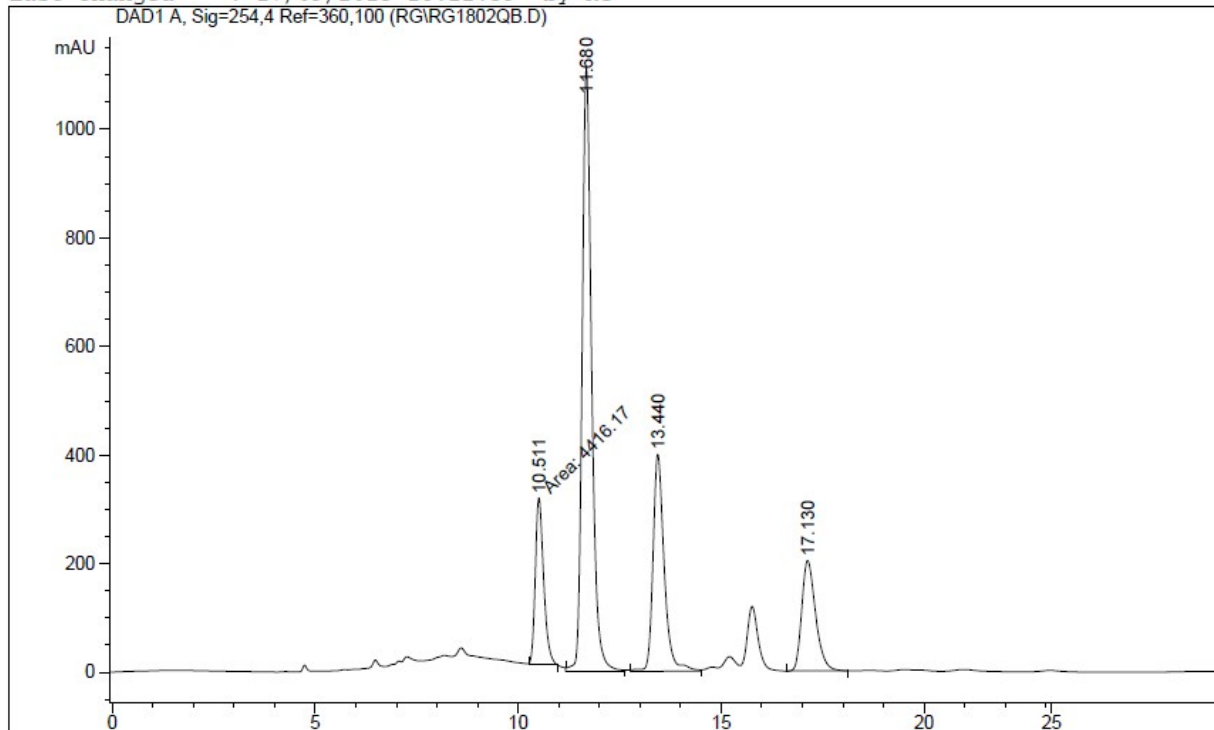

=====  
 Area Percent Report  
 =====

```

Sorted By      :      Signal
Multiplier    :      1.0000
Dilution      :      1.0000
Sample Amount  :      1.00000 [ng/ul]   (not used in calc.)
Use Multiplier & Dilution Factor with ISTDs
  
```

Signal 1: DAD1 A, Sig=254,4 Ref=360,100

| Peak # | RetTime [min] | Type | Width [min] | Area [mAU*s] | Height [mAU] | Area %  |
|--------|---------------|------|-------------|--------------|--------------|---------|
| 1      | 10.511        | MM   | 0.2390      | 4416.16992   | 308.00412    | 12.5918 |
| 2      | 11.680        | VB   | 0.2480      | 1.81144e4    | 1112.26611   | 51.6497 |
| 3      | 13.440        | BV   | 0.2889      | 7710.00830   | 399.91135    | 21.9836 |
| 4      | 17.130        | PP   | 0.3631      | 4831.07959   | 203.39536    | 13.7749 |

Totals :                                    3.50717e4    2023.57693



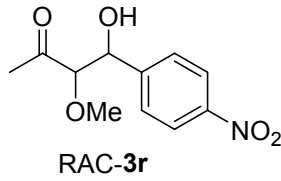

ODH 90/10 1ML

```

=====
Injection Date   : 02/10/2015 13:33:41
Sample Name     : RG1800R2                      Location : Vial 1
Acq. Operator  : RG
Acq. Instrument : HPLC 2                        Inj Volume : 8 µl
Acq. Method    : C:\HPCHEM\2\METHODS\C6_1_60.M
Last changed   : 02/10/2015 11:54:49 by RG
                (modified after loading)
Analysis Method : C:\HPCHEM\2\METHODS\C6_1_60.M
Last changed   : 15/09/2015 10:06:37 by JW
=====

```

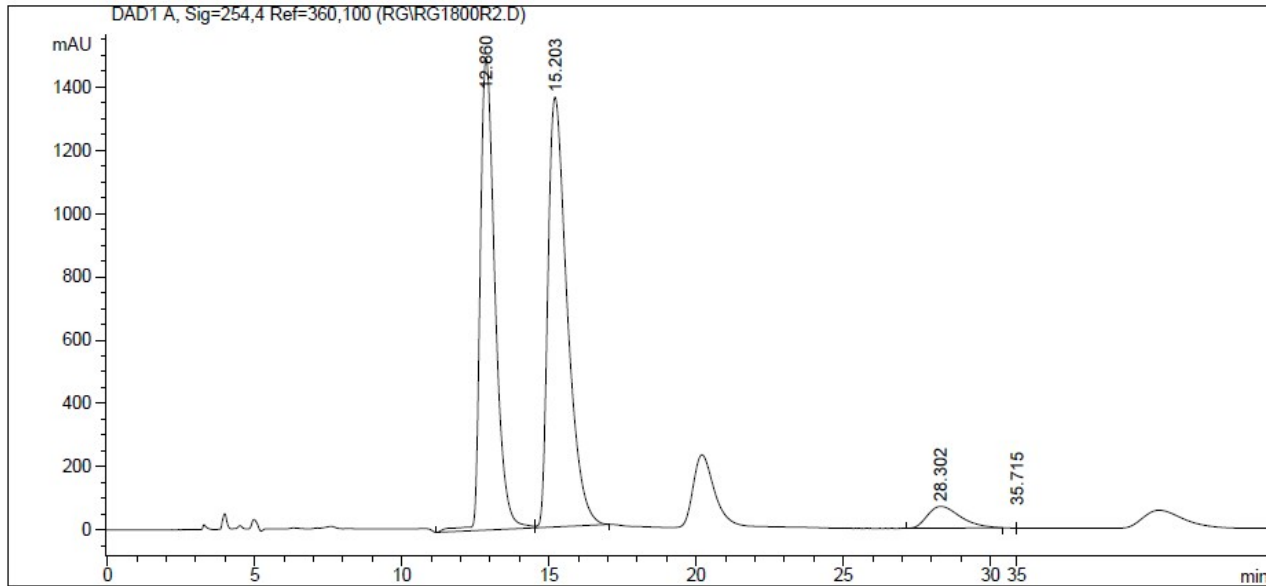

```

=====
                          Area Percent Report
=====

```

```

Sorted By      :      Signal
Multiplier    :      1.0000
Dilution      :      1.0000
Sample Amount  :      1.00000 [ng/ul]   (not used in calc.)
Use Multiplier & Dilution Factor with ISTDs

```

Signal 1: DAD1 A, Sig=254,4 Ref=360,100

| Peak # | RetTime [min] | Type | Width [min] | Area [mAU*s] | Height [mAU] | Area %  |
|--------|---------------|------|-------------|--------------|--------------|---------|
| 1      | 12.860        | PV   | 0.5412      | 5.22954e4    | 1490.80823   | 41.9507 |
| 2      | 15.203        | VB   | 0.6849      | 6.16034e4    | 1358.99268   | 49.4175 |
| 3      | 28.302        | BB   | 0.9628      | 5377.10107   | 69.02448     | 4.3134  |
| 4      | 35.715        | BB   | 1.1283      | 5383.29834   | 56.97568     | 4.3184  |

Totals : 1.24659e5 2975.80106

Results obtained with enhanced integrator!

```

=====
*** End of Report ***

```

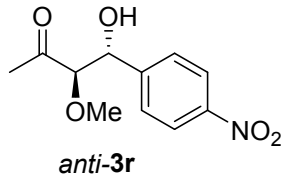

ODH 90/10 1ML

```

=====
Injection Date   : 02/10/2015 12:33:30
Sample Name     : RG1801Q                      Location  : Vial 2
Acq. Operator   : RG
Acq. Instrument : HPLC 2                      Inj Volume: 8 µl
Acq. Method     : C:\HPCHEM\2\METHODS\C6_1_60.M
Last changed    : 02/10/2015 11:54:49 by RG
                  (modified after loading)
Analysis Method : C:\HPCHEM\2\METHODS\C6_1_60.M
Last changed    : 15/09/2015 10:06:37 by JW
=====
  
```

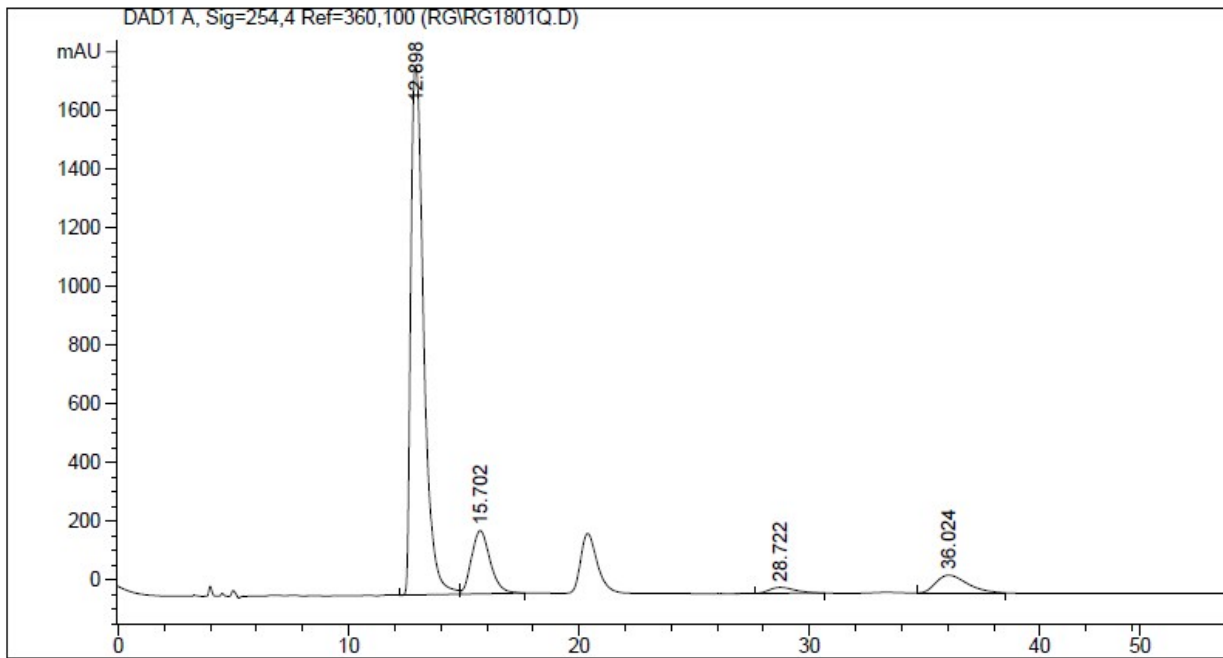

=====  
 Area Percent Report  
 =====

```

Sorted By      : Signal
Multiplier     : 1.0000
Dilution       : 1.0000
Sample Amount  : 1.00000 [ng/ul] (not used in calc.)
Use Multiplier & Dilution Factor with ISTDs
  
```

Signal 1: DAD1 A, Sig=254,4 Ref=360,100

| Peak # | RetTime [min] | Type | Width [min] | Area [mAU*s] | Height [mAU] | Area %  |
|--------|---------------|------|-------------|--------------|--------------|---------|
| 1      | 12.898        | BB   | 0.5977      | 7.02440e4    | 1798.39258   | 78.2572 |
| 2      | 15.702        | BB   | 0.8335      | 1.22000e4    | 215.81902    | 13.5917 |
| 3      | 28.722        | BB   | 0.9333      | 1601.35779   | 20.49984     | 1.7840  |
| 4      | 36.024        | PB   | 1.1219      | 5715.10986   | 60.62152     | 6.3671  |

Totals :                                    8.97605e4  2095.33296

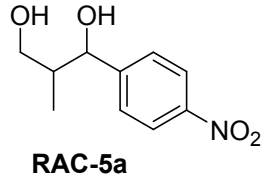

AD, 97:03 (Hx:iPrOH), 1 mL/min, HPLC2

```

=====
Injection Date   : 24/02/2015 13:47:02
Sample Name     : RG154097                      Location  : Vial 1
Acq. Operator   : RG
Acq. Instrument : HPLC 2                        Inj Volume: 7 µl
Acq. Method     : C:\HPCHEM\2\METHODS\C4.M
Last changed    : 24/02/2015 13:21:39 by RG
                  (modified after loading)
Analysis Method : C:\HPCHEM\1\METHODS\RG.M
Last changed    : 23/07/2015 18:37:52 by EZ
=====

```

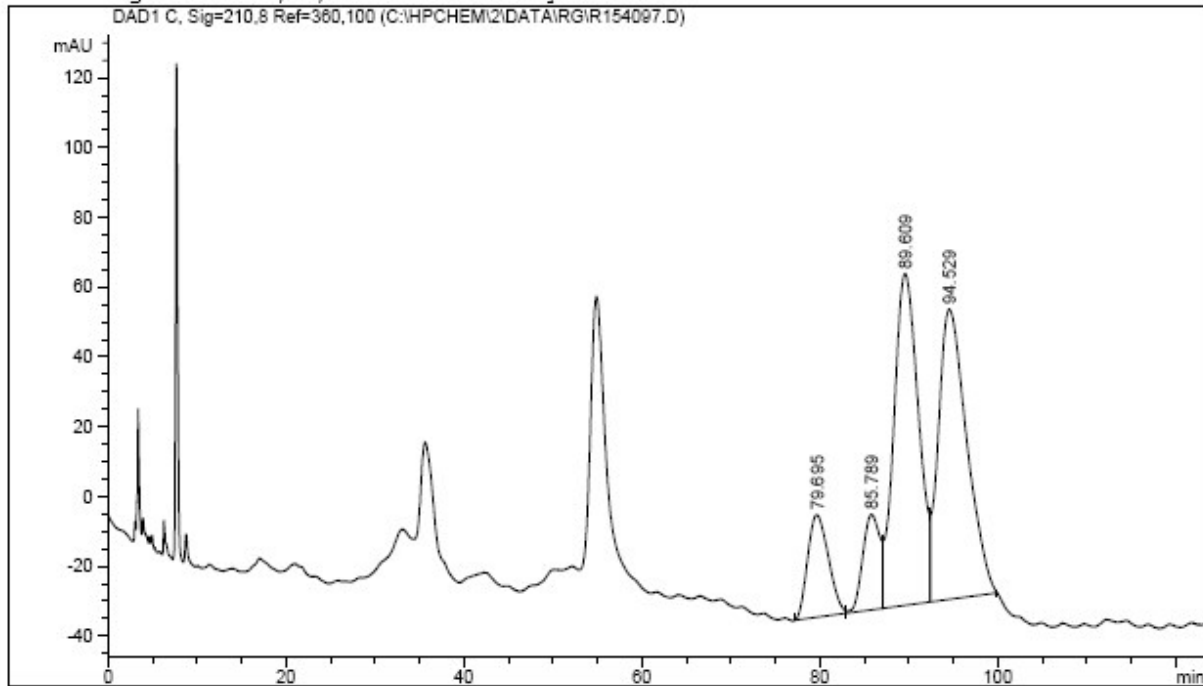

=====  
**Area Percent Report**  
=====

```

Sorted By      : Signal
Multiplier     : 1.0000
Dilution       : 1.0000
Sample Amount  : 1.00000 [ng/ul] (not used in calc.)
Use Multiplier & Dilution Factor with ISTDs

```

Signal 1: DAD1 C, Sig=210,8 Ref=360,100

| Peak # | RetTime [min] | Type | Width [min] | Area [mAU*s] | Height [mAU] | Area %  |
|--------|---------------|------|-------------|--------------|--------------|---------|
| 1      | 79.695        | BV   | 1.9132      | 4788.44092   | 29.41527     | 10.5679 |
| 2      | 85.789        | VV   | 1.5671      | 3659.98535   | 27.45716     | 8.0774  |
| 3      | 89.609        | VV   | 2.2634      | 1.83361e4    | 95.10253     | 40.4670 |
| 4      | 94.529        | VB   | 2.6083      | 1.85267e4    | 83.25191     | 40.8877 |

Totals :                                    4.53113e4    235.22688

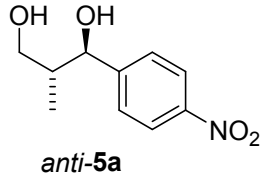

ADH, 97:03 (Hx:iPrOH), 1 mL/min, HPLC2

```

=====
Injection Date   : 24/02/2015 17:56:25
Sample Name     : RG1537ADH
Acq. Operator   : RG
Acq. Instrument : HPLC 2
Acq. Method    : C:\HPCHEM\2\METHODS\C5.M
Last changed   : 24/02/2015 17:55:18 by RG
                  (modified after loading)
Analysis Method : C:\HPCHEM\1\METHODS\RG.M
Last changed   : 23/07/2015 18:37:52 by PZ
=====
  
```

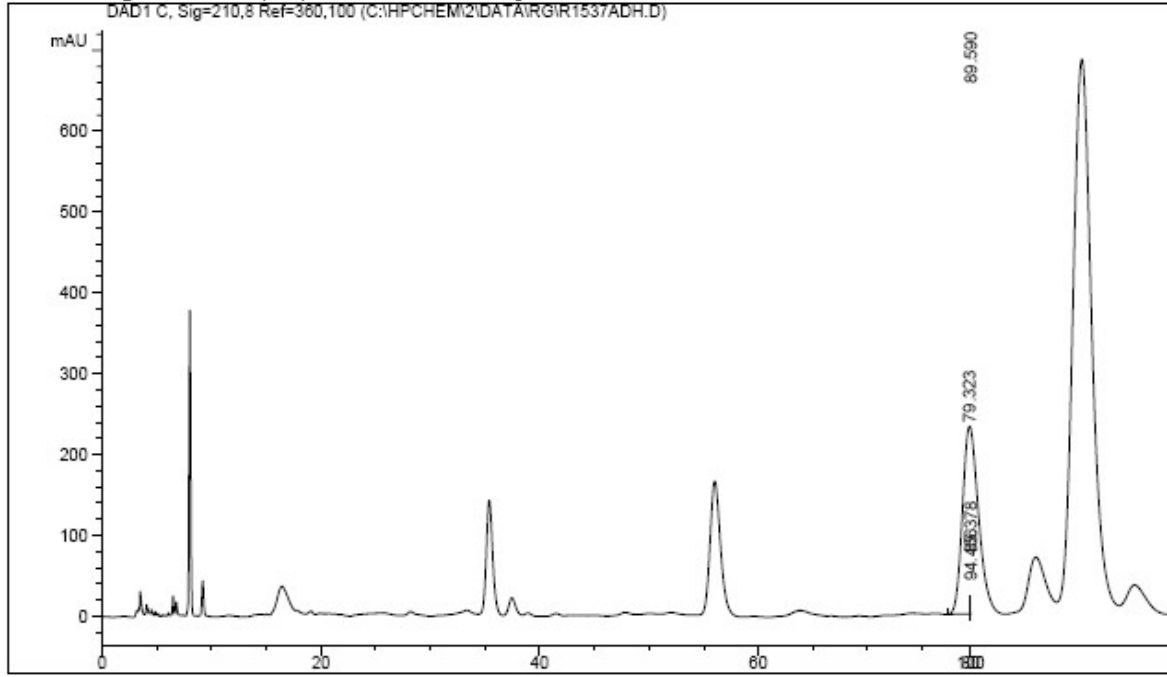

```

=====
                          Area Percent Report
=====
Sorted By      :      Signal
Multiplier    :      1.0000
Dilution      :      1.0000
Sample Amount  :      1.00000 [ng/ul] (not used in calc.)
Use Multiplier & Dilution Factor with ISTDs
  
```

Signal 1: DAD1 C, Sig=210,8 Ref=360,100

| Peak # | RetTime [min] | Type | Width [min] | Area [mAU*s] | Height [mAU] | Area %  |
|--------|---------------|------|-------------|--------------|--------------|---------|
| 1      | 79.323        | BB   | 1.2701      | 2.36037e4    | 232.55391    | 19.9112 |
| 2      | 85.378        | BV   | 1.3228      | 7902.76855   | 70.33704     | 6.6665  |
| 3      | 89.590        | VB   | 1.4855      | 8.25615e4    | 686.31848    | 69.6459 |
| 4      | 94.456        | BB   | 1.4584      | 4476.69727   | 36.10831     | 3.7764  |

Totals : 1.18545e5 1025.31775

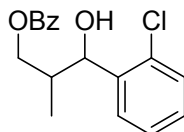

**RAC-5b'**

AD, 97:03, 1 mL/min, GPC

```

=====
Injection Date   : 09/03/2015 13:32:40      Seq. Line   :    1
Sample Name     : RG154997                 Location    : Vial 11
Acq. Operator  : RG                       Inj         :    1
Acq. Instrument : HPLC-GPC                 Inj Volume  : 7 µl
Different Inj Volume from Sequence !      Actual Inj Volume : 8 µl
Acq. Method    : C:\HPCHEM\1\METHODS\RG.M
Last changed   : 09/03/2015 13:31:32 by RG
Analysis Method : C:\HPCHEM\1\METHODS\RG.M
Last changed   : 23/07/2015 18:37:52 by PZ
=====

```

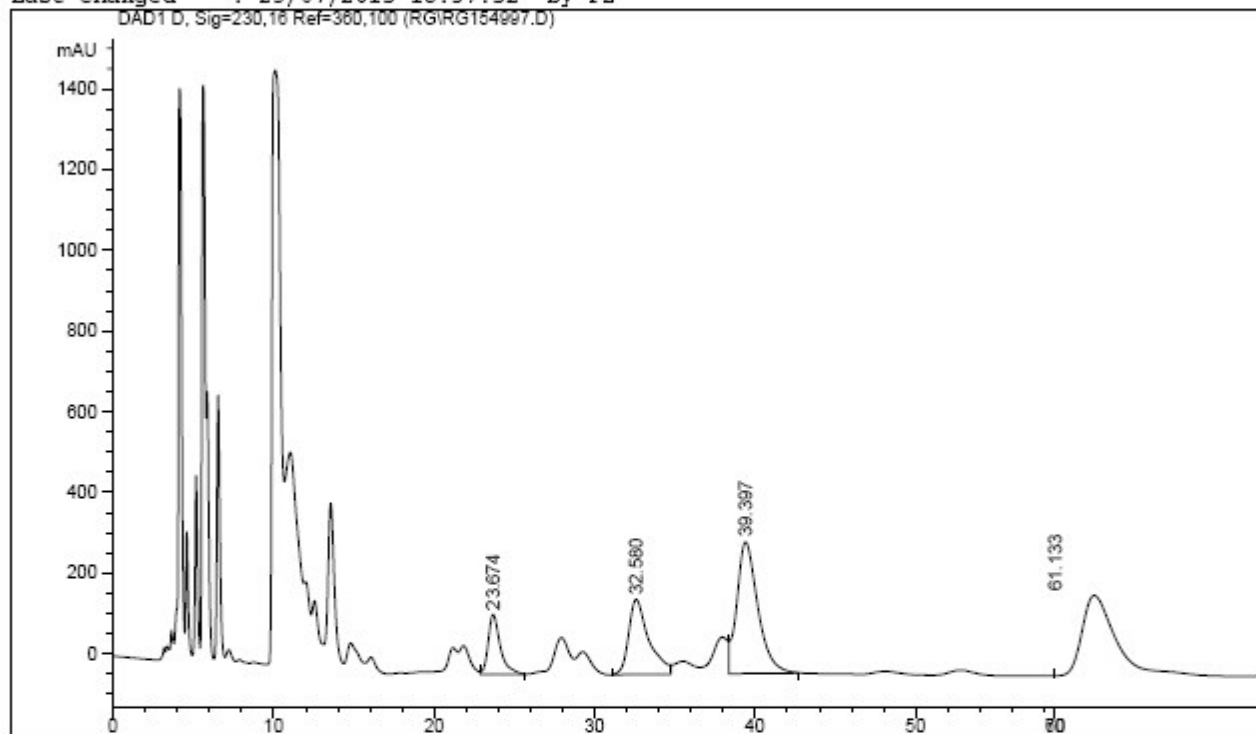

=====  
**Area Percent Report**  
=====

```

Sorted By      :      Signal
Multiplier    :      1.0000
Dilution      :      1.0000
Use Multiplier & Dilution Factor with ISTDs

```

Signal 1: DAD1 D, Sig=230,16 Ref=360,100

| Peak # | RetTime [min] | Type | Width [min] | Area [mAU*s] | Height [mAU] | Area %  |
|--------|---------------|------|-------------|--------------|--------------|---------|
| 1      | 23.674        | VB   | 0.7621      | 7822.98682   | 148.13287    | 9.8614  |
| 2      | 32.580        | BB   | 1.2633      | 1.63134e4    | 186.36140    | 20.5641 |
| 3      | 39.397        | VB   | 1.2937      | 2.97849e4    | 326.07205    | 37.5459 |
| 4      | 61.133        | BB   | 1.5638      | 2.54081e4    | 194.78745    | 32.0286 |

Totals :                                7.93293e4    855.35378

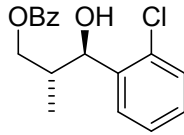

**anti-5b'**

AD, 97:03, 1 mL/min, GPC

```

=====
Injection Date   : 09/03/2015 16:31:40
Sample Name     : RG1548
Acq. Operator   : RG
Acq. Instrument : HPLC-GPC
Acq. Method    : C:\HPCHEM\1\METHODS\RG.M
Last changed   : 09/03/2015 13:31:32 by RG
Analysis Method: C:\HPCHEM\2\METHODS\C4.M
Last changed   : 30/07/2015 14:54:31 by RG
Location       : Vial 12
Inj Volume     : 7 µl
=====

```

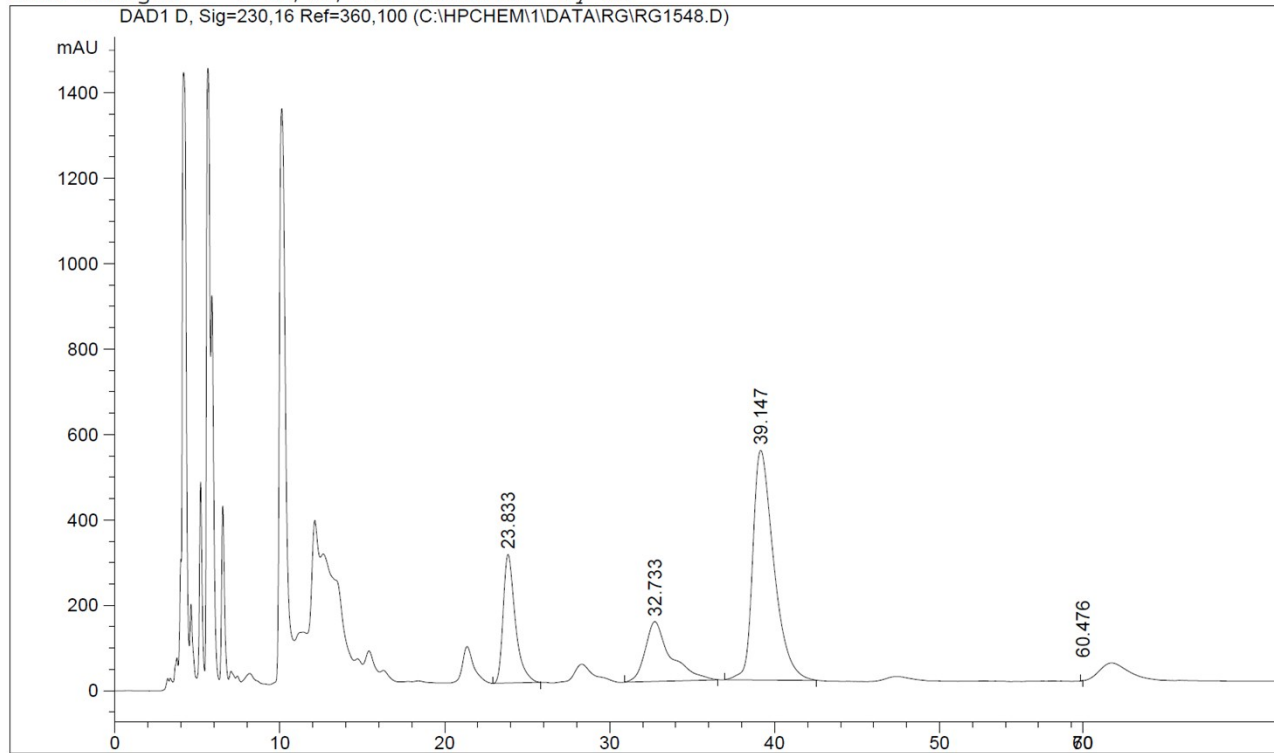

=====  
Area Percent Report  
=====

```

Sorted By      : Signal
Multiplier    : 1.0000
Dilution      : 1.0000
Use Multiplier & Dilution Factor with ISTDs

```

Signal 1: DAD1 D, Sig=230,16 Ref=360,100

| Peak # | RetTime [min] | Type | Width [min] | Area [mAU*s] | Height [mAU] | Area %  |
|--------|---------------|------|-------------|--------------|--------------|---------|
| 1      | 23.833        | VB   | 0.7498      | 1.53810e4    | 301.15872    | 18.4290 |
| 2      | 32.733        | BB   | 1.3732      | 1.50554e4    | 140.16357    | 18.0389 |
| 3      | 39.147        | BB   | 1.2436      | 4.78274e4    | 537.74420    | 57.3054 |
| 4      | 60.476        | BB   | 1.4577      | 5196.83545   | 42.05306     | 6.2267  |

Totals : 8 34606e4 1021 11956

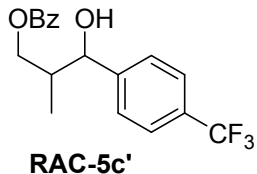

AD 97/03 1 ml/min HPLC2

```

=====
Injection Date   : 21/09/2015 12:51:28
Sample Name      : RG1551V8                      Location : Vial 51
Acq. Operator    : RG
Acq. Instrument  : HPLC 2                        Inj Volume : 7 µl
Acq. Method      : C:\HPCHEM\2\METHODS\C3_1_60.M
Last changed     : 21/09/2015 12:51:58 by RG
                  (modified after loading)
Analysis Method  : C:\HPCHEM\2\METHODS\C3_1_60.M
Last changed     : 30/03/2015 14:08:24 by RG
cOLUMNNA 2
=====

```

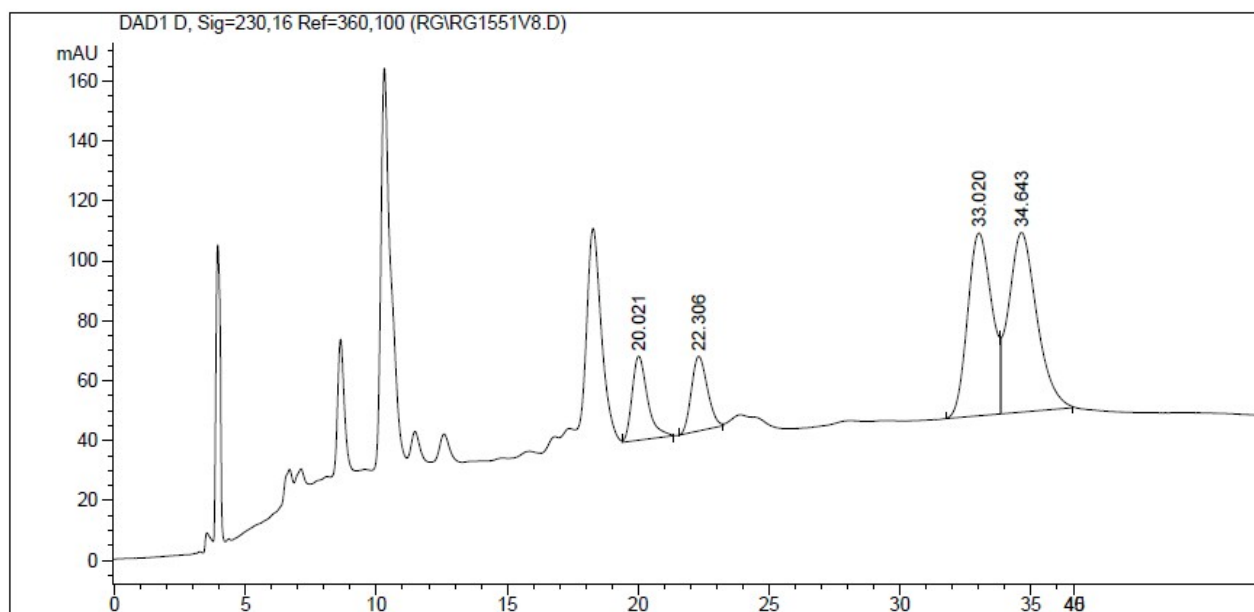

=====  
Area Percent Report  
=====

```

Sorted By       : Signal
Multiplier      : 1.0000
Dilution        : 1.0000
Sample Amount   : 1.00000 [ng/ul] (not used in calc.)
Use Multiplier & Dilution Factor with ISTDs

```

Signal 1: DAD1 D, Sig=230,16 Ref=360,100

| Peak # | RetTime [min] | Type | Width [min] | Area [mAU*s] | Height [mAU] | Area %  |
|--------|---------------|------|-------------|--------------|--------------|---------|
| 1      | 20.021        | VB   | 0.6149      | 1154.50525   | 28.12388     | 10.8056 |
| 2      | 22.306        | PV   | 0.6362      | 1061.09180   | 24.94789     | 9.9313  |
| 3      | 33.020        | BV   | 0.9216      | 3920.74097   | 61.02012     | 36.6962 |
| 4      | 34.643        | VB   | 1.0266      | 4547.98730   | 59.98472     | 42.5669 |

Totals : 1.06843e4 174.07660

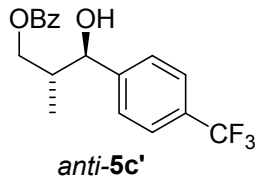

AD 97/03 1 ml/min HPLC2

```

=====
Injection Date   : 21/09/2015 13:58:09
Sample Name      : RG1550PURO-V7-20           Location   : Vial 52
Acq. Operator    : RG
Acq. Instrument  : HPLC 2                     Inj Volume : 7 µl
Acq. Method      : C:\HPCHEM\2\METHODS\C3_1_60.M
Last changed     : 21/09/2015 12:51:58 by RG
                  (modified after loading)
Analysis Method  : C:\HPCHEM\2\METHODS\C3_1_60.M
Last changed     : 30/03/2015 14:08:24 by RG
COLUMNA 2
=====

```

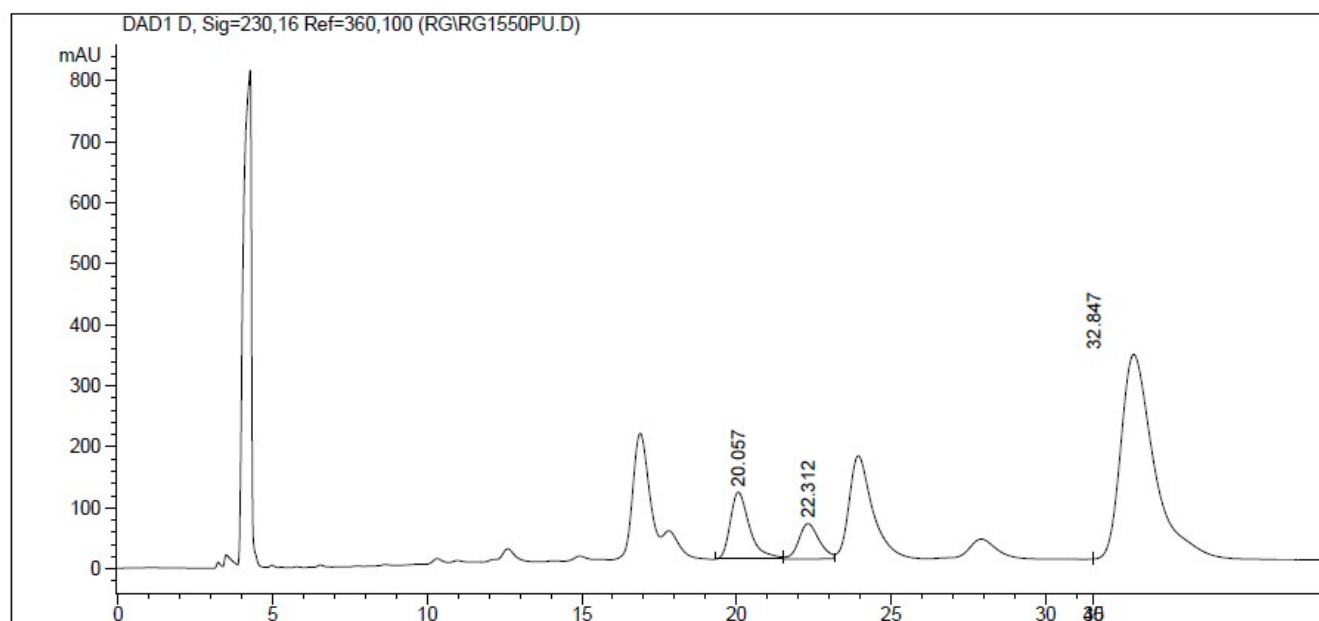

=====  
Area Percent Report  
=====

```

Sorted By       : Signal
Multiplier      : 1.0000
Dilution        : 1.0000
Sample Amount   : 1.00000 [ng/ul] (not used in calc.)
Use Multiplier & Dilution Factor with ISTDs

```

Signal 1: DAD1 D, Sig=230,16 Ref=360,100

| Peak # | RetTime [min] | Type | Width [min] | Area [mAU*s] | Height [mAU] | Area %  |
|--------|---------------|------|-------------|--------------|--------------|---------|
| 1      | 20.057        | PB   | 0.6536      | 4775.55615   | 109.76529    | 14.7372 |
| 2      | 22.312        | BV   | 0.6903      | 2654.88940   | 57.96550     | 8.1929  |
| 3      | 32.847        | BB   | 1.1166      | 2.49743e4    | 335.43155    | 77.0699 |

Totals :                                    3.24048e4    503.16233



## References

- [1] B. List, R. A. Lerner, C. F. Barbas III, *J. Am. Chem. Soc.* **2000**, *122*, 2395-2396.
- [2] P. Kotrusz, I. Kmentová, B. Gotov, S. Toma, E. Solčániová, *Chem. Commun.* **2002**, 2510-2511.
- [3] Z. Tang, Z.-H. Yang, X.-H. Chen, L.-F. Cun, A.-Q. Mi, Y.-Z. Jiang, L.-Z. Gong, *J. Am. Chem. Soc.* **2005**, *127*, 9285-9289.
- [4] L. He, J. Jiang, Z. Tang, X. Cui, A.-Q. Mi, Y.-Z. Jiang, Z. Gong, *Tetrahedron Asymmetry* **2007**, *18*, 265-270.
- [5] R. A. Flowers II, X. Xu, C. Timmons, G. Li, *Eur. J. Org. Chem.* **2004**, 2988-2990.
- [6] J. Chen, X. Li, X. Xing, W. Xiao, *J. Org. Chem.* **2006**, *71*, 8198-8202.
- [7] B. Sun, L. Peng, X. Chen, Y. Li, Y. Lia, K. Yamasaki, *Tetrahedron: Asymmetry* **2005**, *16*, 1305-1307.
- [8] G. Guillena, M. C. Hita, C. Nájera, S. F. Viózquez, *J. Org. Chem.* **2008**, *73*, 5933-5943
- [9] S. Zhang, W. Duan, W. Wang, *Adv. Synth. Catal.* **2006**, *348*, 1228-1234.
- [10] Y. Hayashi, S. Aratake, T. Itoh, T. Okano, T. Sumiya, M. Shoji, *Chem. Commun.* **2007**, 957-959.
